# Supplementary material for: Tandem reactions of cis-2-acyl-1-alkynyl-1-aryl cyclopropanes tuned by gold(i) and silver(i) catalysts: efficient synthesis of pyran-fused indene cores and 2,4,6-trisubstituted phenols
Source: Royal Society of Chemistry journal article supplement (doi:10.1039/b909181e), 2009-01-01
Supplement: b909181e.pdf [file b909181e.pdf]

*Supporting Information For*

**Tandem reactions of cis-2-acyl-1-alkynyl-1-aryl  
cyclopropanes tuned by gold(I) and silver(I) catalysts:  
Efficient synthesis of pyran-fused indene cores and  
2,4,6-trisubstitutedphenols**

Xiao-Ming Zhang, Yong-Qiang Tu,\* Yi-Jun Jiang, Yong-Qiang Zhang, Chun-An Fan  
and Fu-Min Zhang\*

*State Key Laboratory of Applied Organic Chemistry and Department of Chemistry, Lanzhou  
University, Lanzhou 730000, P. R. China*

( E-mail: [tuyq@lzu.edu.cn](mailto:tuyq@lzu.edu.cn) )

Contents

**1. Typical Experimental Procedures**

- 1.1 Typical experimental procedures to synthesize **(Z)-2-en-4-yn-1-ols** -----S2
- 1.2 Typical experimental procedures to synthesize compounds **cis-II** -----S3
- 1.3 Typical experimental procedures to synthesize compounds **cis-1** -----S3
- 1.4 Typical experimental procedures of gold(I) catalyzed reaction -----S4
- 1.5 Typical experimental procedures of silver(I) catalyzed reaction -----S4

**2. Spectroscopic and Analytical Data of the Products**

- 2.1 Spectroscopic and analytical data of the products **cis-IIa** to **cis-IIj** ----S4 - 6
- 2.2 Spectroscopic and analytical data of the products **cis-1a** to **cis-1j** --S6 - 10
- 2.3 Spectroscopic and analytical data of the products **2a** to **2i**, **4a**, **4i** --S10 - 13
- 2.4 Spectroscopic and analytical data of the products **3a** to **3j**, **5i** -----S14 - 17

**3. Copies of NMR Spectra of the Products**

- 3.1 <sup>1</sup>H NMR and <sup>13</sup>C NMR Spectra of compounds **cis-IIa** to **cis-IIj** ----S18 - 31
- 3.2 <sup>1</sup>H NMR and <sup>13</sup>C NMR Spectra of compounds **cis-1a** to **cis-1j** ----S32 - 51
- 3.3 <sup>1</sup>H NMR and <sup>13</sup>C NMR Spectra of compounds **2a** to **2i**, **4a**, **4i** -----S52 - 71
- 3.4 <sup>1</sup>H NMR and <sup>13</sup>C NMR Spectra of compounds **3a** to **3j**, **5i** -----S72 - 94

**General:** All chemicals were used as received, and the solvent dichloromethane was refluxed with CaH<sub>2</sub> and freshly distilled prior to use. All reactions under standard conditions were monitored by thin-layer chromatography (TLC) on gel F254 plates. The silica gel (200-300 meshes) is used for column chromatography, and the distillation range of petroleum is 60-90°C. <sup>1</sup>H and <sup>13</sup>C NMR spectra were recorded in CDCl<sub>3</sub> solution on Bruker AM-400 MHz instruments. The MS data were obtained with EI (70 eV), and the relative intensity (%) is given in brackets. High-resolution mass spectral analysis (HRMS) data were measured on the Bruker Apex II by means of the ESI, APCI and ESI negative techniques.

## 1. Typical Experimental Procedures

### 1.1 Typical experimental procedures to synthesize (Z)-2-en-4-yn-1-ols

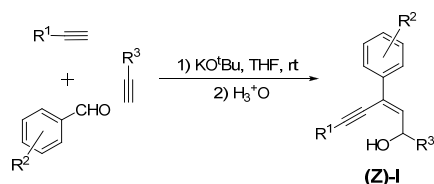

(Z)-2-en-4-yn-1-ols **la** to **le** and **lj** were prepared through a one-pot three-component coupling which was reported by our group.<sup>1</sup>

Aldehyde (2 mmol) was added to the mixture of alkyne (4.4 mmol) and KO<sup>t</sup>Bu (3.6 mmol) in freshly distilled solvent at rt under argon atmosphere. After the reaction was stirred for 3 min, it was cooled to 0°C and neutralized with H<sub>2</sub>SO<sub>4</sub> (10% in water) to acidity. After the product formed in the first step disappeared by TLC, the organic layer was separated followed by the extraction of the aqueous layer with Et<sub>2</sub>O. The combined organic extracts were washed with a saturated solution of NaHCO<sub>3</sub> and brine and dried over anhydrous Na<sub>2</sub>SO<sub>4</sub>. After removal of the solvent, the residue was purified by the column chromatography on silica gel (petroleum/ethyl acetate = 16/1) to furnish the expected product.

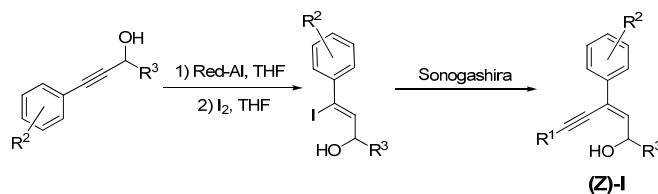

(Z)-2-en-4-yn-1-ols **lf** to **li** were prepared by the Sonogashira coupling reaction of iodinated allylic alcohols with terminal alkynes. The iodide precursors were conveniently synthesized from the corresponding propargylic alcohols by their reaction with Red-Al (Red-Al = sodium bis(2-methoxyethoxy)aluminumhydride) followed by iodination of the organoaluminum intermediate.<sup>2</sup>

Under an argon atmosphere, to a solution of propargylic alcohols (5 mmol) in dry THF (15 ml) was added Red-Al (8 mmol, 65% w/w in toluene) at 0°C, then the mixture was warmed to room temperature and stirred for 3 h. A solution of I<sub>2</sub> in THF (40 mmol) was added dropwise at -78°C. Then the mixture was warmed up to room temperature and stirred for 1

h. The mixture was treated with saturated  $\text{Na}_2\text{S}_2\text{O}_3$  and extracted with ethyl acetate. The extract was washed with saturated  $\text{Na}_2\text{S}_2\text{O}_3$ , brine, dried over anhydrous  $\text{Na}_2\text{SO}_4$  and evaporated. Chromatography on silica gel (petroleum ether/ethyl acetate = 15/1) afforded the iodide precursor.

To a solution of the iodide precursor (3 mmol) in THF (12 ml) was added alkyne (3 mmol),  $\text{PdCl}_2(\text{PPh}_3)_2$  (0.03 mmol),  $\text{CuI}$  (0.06 mmol) and  $(i\text{Pr})_2\text{NH}$  (9 mmol) at room temperature. Then the mixture was stirred at rt for 3h. The reaction was quenched with 5M HCl solution. The residue was extracted with ethyl acetate, washed with brine, dried over anhydrous  $\text{Na}_2\text{SO}_4$ . Chromatography on silica gel (petroleum ether/ethyl acetate = 16/1) afforded the expected product.

## 1.2 Typical experimental procedures to synthesize compounds cis-II

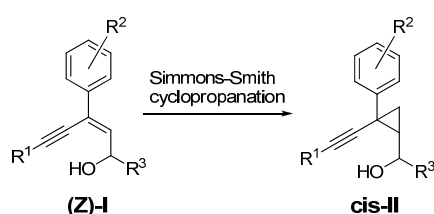

A 25 mL round-bottom flask that contained 3 mL of  $\text{CH}_2\text{Cl}_2$  was cooled to  $-30^\circ\text{C}$ , and 4.3 mL (2.2 equiv, 3.72 mmol) of a 15w/w% solution of diethyl zinc in hexane was added under argon atmosphere. This solution was treated with 0.61 mL (4.4 equiv, 7.44 mmol) of methylene iodide, and the reaction was stirred for 30 min at  $-30^\circ\text{C}$ . To this solution was added 2 mL of a methylene chloride solution that contained 577 mg (1 equiv, 1.86 mmol) 2-en-4-yn-1-ols **Ia**. The reaction mixture was allowed to stir at  $-30^\circ\text{C}$  for 1 day, then  $-20^\circ\text{C}$  for 1 day. The reaction was quenched with saturated  $\text{NH}_4\text{Cl}$  solution, and the aqueous portion was extracted with  $\text{Et}_2\text{O}:\text{CH}_2\text{Cl}_2 = 5:1$ . The combined organic solutions were dried over  $\text{Na}_2\text{SO}_4$ , concentrated to give a crude oil, which was purified on silica gel (petroleum: ethyl acetate 16:1 to 8:1) to give **IIa** (422 mg 70%).

## 1.3 Typical experimental procedures to synthesize compounds cis-1

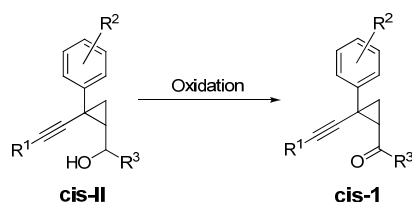

A solution of **IIa** (434 mg, 1.34 mmol) in dry  $\text{CH}_2\text{Cl}_2$  (3 mL) was added the PCC (434 mg, 2.01 mmol) and silica gel (434 mg) mixtures at  $0^\circ\text{C}$ . After stirring at room temperature for 5 hours, the reaction mixture was purified through column chromatography first on  $\text{Al}_2\text{O}_3$  (ethyl acetate) then on silica gel (petroleum: ethyl acetate 40:1) to afford **1a** (280 mg 65%).

## 1.4 Typical experimental procedures of gold(I) catalyzed reaction

A solution of **1a** (33 mg, 0.10 mmol) in dry CH<sub>2</sub>Cl<sub>2</sub> (1 mL) was added a solution of Ph<sub>3</sub>AuOTf (generated by mixing equal equivalents of PPh<sub>3</sub>AuCl and AgOTf, with AgCl filtered off) in CH<sub>2</sub>Cl<sub>2</sub> (0.02 M, 0.5 mL, 0.01 mmol) under argon atmosphere. The mixture was stirred for 2h at room temperature. After evaporation of the solvent, the residue was purified by column chromatography on silica gel (petroleum: ethyl acetate 100:1) to afford **2a** (28 mg 85%).

## 1.5 Typical experimental procedures of silver(I) catalyzed reaction

A solution of **1a** (33 mg, 0.10 mmol) in dry CH<sub>2</sub>Cl<sub>2</sub> (1 mL) was added NaHCO<sub>3</sub> (9 mg, 0.10 mmol), then AgOTf (5 mg, 0.02mmol) under argon atmosphere. The mixture was stirred for 50 min at room temperature. After evaporation of the solvent, the residue was purified by column chromatography on silica gel (petroleum: ethyl acetate 60:1) to afford **3a** (26.5 mg, 80%).

## 2. Spectroscopic and Analytical Data of the Products

### 2.1 Spectroscopic and analytical data of the products cis-IIa to cis-IIj

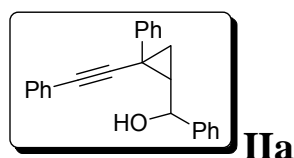

**<sup>1</sup>H NMR** (400 MHz, CDCl<sub>3</sub>): δ = 7.52-7.60 (d, 2H, *J* = 7.2 Hz), 7.39-7.45 (m, 2H), 7.31-7.38 (dd, 2H, *J* = 7.2 Hz and 7.2 Hz), 7.20-7.31 (m, 8H), 7.14-7.20 (dd, 1H, *J* = 6.8 Hz and 6.8 Hz), 4.88-4.94 (d, 1H, *J* = 8.0 Hz), 2.24 (s, b, 1H), 1.83-1.92 (ddd, 1H, *J* = 8.8 Hz, 8.0 Hz and 6.4 Hz), 1.71-1.77 (dd, 1H, *J* = 6.4 Hz and 5.2 Hz), 1.65-1.71 ppm(dd, 1H, *J* = 8.8 Hz and 5.2 Hz); **<sup>13</sup>C NMR** (100 MHz, CDCl<sub>3</sub>): δ = 143.5, 141.2, 131.7, 128.5, 128.4, 128.3, 128.0, 127.6, 126.4, 126.0, 125.9, 123.2, 90.9, 82.2, 74.8, 37.6, 23.3, 22.1 ppm; **EI MS** (70 eV): *m/z* (%): 324 (1) [M]<sup>+</sup>, 228 (2), 122 (76), 120 (100), 91 (56), 77 (56).

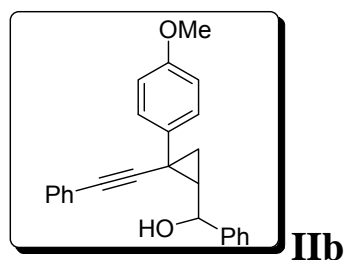

**<sup>1</sup>H NMR** (400 MHz, CDCl<sub>3</sub>): δ = 7.54-7.60 (d, 2H, *J* = 7.6 Hz), 7.38-7.44 (m, 2H), 7.30-7.38 (dd, 2H, *J* = 7.6 Hz and 7.6 Hz), 7.23-7.30 (m, 4H), 7.16-7.23 (d, 2H, *J* = 8.4 Hz), 6.75-6.81 (d, 2H, *J* = 8.4 Hz), 4.84-4.90 (d, 1H, *J* = 8.4 Hz), 3.73 (s, 3H), 2.30 (s, b, 1H),

1.76-1.85 (ddd, 1H,  $J = 8.4$  Hz, 8.4 Hz and 6.8 Hz), 1.64-1.70 (dd, 1H,  $J = 6.8$  Hz and 5.2 Hz), 1.57-1.64 ppm(dd, 1H,  $J = 8.4$  Hz and 5.2 Hz);  $^{13}\text{C NMR}$  (100 MHz,  $\text{CDCl}_3$ ):  $\delta = 158.2, 143.6, 133.4, 131.6, 128.5, 128.2, 127.9, 127.6, 127.4, 126.0, 123.3, 113.8, 91.4, 81.7, 74.9, 55.2, 37.0, 22.8, 21.6$  ppm; **EI MS** (70 eV):  $m/z$  (%): 354 (0.09)  $[\text{M}]^+$ , 236 (3), 247 (35), 234 (100), 91 (48), 77 (57).

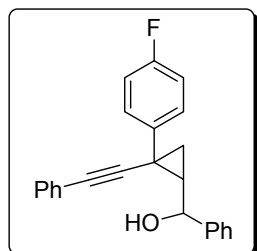

**IIId**

$^1\text{H NMR}$  (400 MHz,  $\text{CDCl}_3$ ):  $\delta = 7.53$ -7.60 (d, 2H,  $J = 7.2$  Hz), 7.38-7.45 (m, 2H), 7.32-7.38 (dd, 2H,  $J = 7.2$  Hz and 7.2 Hz), 7.25-7.32 (m, 4H), 7.19-7.25 (dd, 2H,  $J = 7.6$  Hz and 6.4 Hz), 6.90-6.99 (dd, 2H,  $J = 8.4$  Hz and 8.4 Hz), 4.85-4.92 (d, 1H,  $J = 8.0$  Hz), 2.27 (s, b, 1H), 1.77-1.86 (ddd, 1H,  $J = 8.4$  Hz, 8.0 Hz and 6.8 Hz), 1.68-1.75 (dd, 1H,  $J = 6.8$  Hz and 5.2 Hz), 1.60-1.68 ppm(dd, 1H,  $J = 8.4$  Hz and 5.2 Hz);  $^{13}\text{C NMR}$  (100 MHz,  $\text{CDCl}_3$ ):  $\delta = 162.7, 160.3, 143.5, 137.0, 137.0, 131.6, 128.5, 128.3, 128.1, 127.8, 127.7, 125.9, 123.1, 115.3, 115.1, 90.8, 82.1, 74.8, 37.4, 23.1, 21.6$  ppm; **EI MS** (70 eV):  $m/z$  (%): 342 (0.34)  $[\text{M}]^+$ , 251 (3), 222 (31), 120 (100), 91 (39), 77 (43).

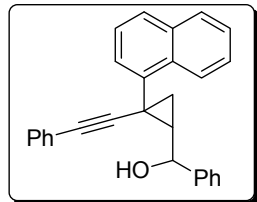

**IIe**

$^1\text{H NMR}$  (400 MHz,  $\text{CDCl}_3$ ):  $\delta = 7.90$ -7.98 (d, 1H,  $J = 8.4$  Hz), 7.75-7.80 (d, 1H,  $J = 8.0$  Hz), 7.65-7.72 (m, 3H), 7.36-7.46 (m, 5H), 7.25-7.36 (m, 3H), 7.18-7.25 (m, 4H), 4.95-5.05 (d, 1H,  $J = 8.4$  Hz), 2.33 (s, b, 1H), 1.87-1.95 (ddd, 1H,  $J = 8.4$  Hz, 8.4 Hz and 5.2 Hz), 1.76-1.82 (dd, 1H,  $J = 5.2$  Hz and 4.8 Hz), 1.66-1.73 ppm(dd, 1H,  $J = 8.4$  Hz and 4.8 Hz);  $^{13}\text{C NMR}$  (100 MHz,  $\text{CDCl}_3$ ):  $\delta = 143.5, 137.5, 133.8, 132.0, 131.6, 128.7, 128.3, 128.2, 128.1, 128.0, 127.8, 126.6, 126.3, 125.8, 125.6, 125.2, 125.1, 123.3, 91.9, 80.4, 75.8, 34.8, 21.5, 21.1$  ppm; **EI MS** (70 eV):  $m/z$  (%): 356 (2), 270 (13), 254 (92), 120 (100), 91 (75), 77 (73).

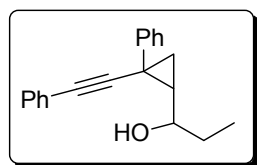

**IIh**

$^1\text{H NMR}$  (400 MHz,  $\text{CDCl}_3$ ):  $\delta = 7.41$ -7.46 (m, 2H), 7.35-7.41 (m, 2H), 7.26-7.35 (m, 5H), 7.18-7.25 (dd, 1H,  $J = 7.6$  Hz and 7.6 Hz), 3.68-3.78 (m, 1H), 1.80-1.90 (m, 2H), 1.67-1.80

(m, 1H), 1.50-1.63 (m, 3H), 1.03-1.11 ppm(t, 3H,  $J = 7.2$  Hz);  $^{13}\text{C NMR}$  (100 MHz,  $\text{CDCl}_3$ ):  $\delta = 141.6, 131.6, 128.4, 128.3, 127.9, 126.3, 125.7, 123.3, 90.6, 81.6, 74.7, 36.3, 30.1, 23.2, 21.4, 10.0$  ppm; **EI MS** (70 eV):  $m/z$  (%): 276 (3)  $[\text{M}]^+$ , 247 (22), 217 (54), 204 (100), 189 (33), 115 (24).

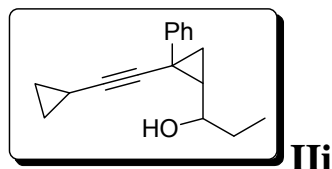

$^1\text{H NMR}$  (400 MHz,  $\text{CDCl}_3$ ):  $\delta = 7.25-7.32$  (m, 4H), 7.14-7.21 (m, 1H), 3.57-3.67 (m, 1H), 1.93 (s, b, 1H), 1.69-1.80 (m, 1H), 1.60-1.69 (m, 1H), 1.32-1.44 (m, 3H), 1.21-1.31 (m, 1H), 0.98-1.08 (t, 3H,  $J = 7.2$  Hz), 0.71-0.79 (m, 2H), 0.61-0.67 ppm(m, 2H);  $^{13}\text{C NMR}$  (100 MHz,  $\text{CDCl}_3$ ):  $\delta = 142.3, 128.3, 126.0, 125.5, 85.1, 75.9, 74.2, 35.7, 30.0, 22.5, 20.7, 9.9, 8.3, 8.2, 0.0$  ppm; **EI MS** (70 eV):  $m/z$  (%): 240 (0.36)  $[\text{M}]^+$ , 211 (15), 182 (24), 167 (100), 153 (74), 115 (50).

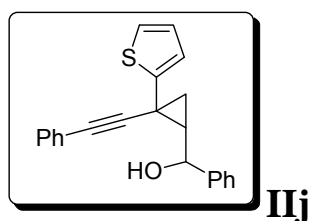

$^1\text{H NMR}$  (400 MHz,  $\text{CDCl}_3$ ):  $\delta = 7.55-7.60$  (d, 2H,  $J = 7.6$  Hz), 7.39-7.45 (m, 2H), 7.33-7.39 (dd, 2H,  $J = 7.6$  Hz and 7.6 Hz), 7.26-7.33 (m, 4H), 7.05-7.10 (dd, 1H,  $J = 3.2$  Hz and 3.2 Hz), 6.85-6.90 (d, 2H,  $J = 3.2$  Hz), 4.83-4.90 (d, 1H,  $J = 7.6$  Hz), 2.24 (s, b, 1H), 1.91-2.00 (ddd, 1H,  $J = 8.8$  Hz, 7.6 Hz and 6.8 Hz), 1.79-1.85 (dd, 1H,  $J = 6.8$  Hz and 5.2 Hz), 1.66-1.74 ppm(dd, 1H,  $J = 8.8$  Hz and 5.2 Hz);  $^{13}\text{C NMR}$  (100 MHz,  $\text{CDCl}_3$ ):  $\delta = 146.9, 143.2, 131.7, 128.5, 128.3, 128.2, 127.7, 126.8, 126.0, 123.2, 123.0, 122.9, 90.0, 81.9, 74.4, 39.0, 25.2, 19.0$  ppm; **EI MS** (70 eV):  $m/z$  (%): 255 (11), 223 (14), 192 (18), 84 (65), 64 (95), 41 (100).

## 2.2 Spectroscopic and analytical data of the products cis-1a to cis-1j

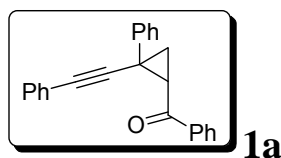

Following the typical experimental procedures **1a** was prepared in 52% yield over two steps from (Z)-2-en-4-yn-1-ol **1a**.  $^1\text{H NMR}$  (400 MHz,  $\text{CDCl}_3$ ):  $\delta = 7.92-8.00$  (d, 2H,  $J = 7.6$  Hz), 7.50-7.58 (m, 3H), 7.38-7.48 (m, 4H), 7.25-7.35 (m, 3H), 7.16-7.24 (m, 3H), 3.14-3.22 (dd, 1H,  $J = 7.6$  Hz and 7.2 Hz), 2.47-2.54 (dd, 1H,  $J = 7.2$  Hz and 5.2 Hz), 1.92-2.00 ppm(dd, 1H,  $J = 7.6$  Hz and 5.2 Hz);  $^{13}\text{C NMR}$  (100 MHz,  $\text{CDCl}_3$ ):  $\delta = 193.7, 140.2, 137.9, 132.9, 131.8, 128.8, 128.6, 128.3, 128.0, 127.8, 127.1, 125.8, 123.0, 88.0,$

82.2, 38.3, 27.6, 22.6 ppm; **EI MS** (70 eV):  $m/z$  (%): 322 (19)  $[M]^+$ , 217 (20), 189 (26), 105 (78), 77 (100), 51 (39); **HRMS** (ESI):  $m/z$  calcd for  $C_{24}H_{18}O$   $[M+H]^+$ : 323.1430; found: 323.1423.

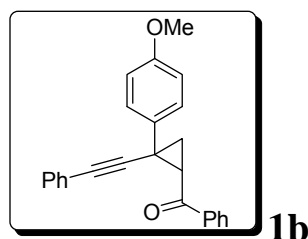

Following the typical experimental procedures **1b** was prepared in 50% yield over two steps from (Z)-2-en-4-yn-1-ol **1b**.  **$^1H$  NMR** (400 MHz, Acetone- $d_6$ ):  $\delta$  = 7.98-8.05 (d, 2H,  $J$  = 7.6 Hz), 7.58-7.65 (m, 1H), 7.49-7.57 (m, 4H), 7.25-7.30 (m, 5H), 6.97-7.02 (dd, 2H,  $J$  = 6.8 Hz and 2.0 Hz), 3.83 (s, 3H), 3.37-3.43 (dd, 1H,  $J$  = 7.6 Hz and 7.2 Hz), 2.32-2.37 (dd, 1H,  $J$  = 7.2 Hz and 4.8 Hz), 1.98-2.03 ppm(dd, 1H,  $J$  = 7.6 Hz and 4.8 Hz);  **$^{13}C$  NMR** (100 MHz, Acetone- $d_6$ ):  $\delta$  = 194.0, 160.0, 139.0, 133.9, 133.0, 132.4, 129.6, 129.2, 129.0, 128.9, 128.1, 124.2, 115.0, 90.0, 82.3, 55.7, 38.6, 27.6, 22.8 ppm; **EI MS** (70 eV):  $m/z$  (%): 352 (1)  $[M]^+$ , 247 (4), 236 (75), 208 (78), 129 (100), 77 (55). **HRMS** (APCI):  $m/z$  calcd for  $C_{25}H_{20}O_2$   $[M+H]^+$ : 353.1536; found: 353.1539.

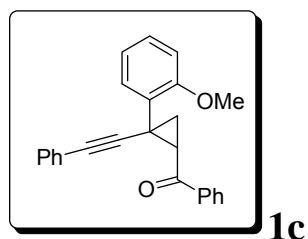

Following the typical experimental procedures **1c** was prepared in 45% yield over two steps from (Z)-2-en-4-yn-1-ol **1c**.  **$^1H$  NMR** (400 MHz,  $CDCl_3$ ):  $\delta$  = 8.15-8.20 (d, 2H,  $J$  = 8.0 Hz), 7.52-7.60 (dd, 1H,  $J$  = 7.2 Hz and 7.2 Hz), 7.40-7.52 (m, 3H), 7.20-7.32 (m, 3H), 7.12-7.18 (m, 3H), 6.90-7.00 (m, 2H), 3.80 (s, 3H), 3.16-3.22 (dd, 1H,  $J$  = 7.6 Hz and 6.4 Hz), 2.36-2.43 (dd, 1H,  $J$  = 6.4 Hz and 4.8 Hz), 1.80-2.87 ppm(dd, 1H,  $J$  = 7.6 Hz and 4.8 Hz);  **$^{13}C$  NMR** (100 MHz,  $CDCl_3$ ):  $\delta$  = 194.8, 158.3, 138.5, 132.5, 131.8, 129.9, 129.3, 129.0, 128.5, 128.3, 127.8, 127.4, 123.7, 120.6, 111.3, 89.4, 79.6, 55.2, 34.2, 26.1, 21.7 ppm; **EI MS** (70 eV):  $m/z$  (%): 352 (6)  $[M]^+$ , 247 (28), 135 (46), 105 (100), 77 (64), 51 (24); **HRMS** (ESI):  $m/z$  calcd for  $C_{25}H_{20}O_2$   $[M+H]^+$ : 353.1536; found: 353.1534.

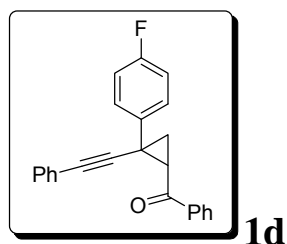

Following the typical experimental procedures **1d** was prepared in 53% yield over two steps from (Z)-2-en-4-yn-1-ol **1d**.  **$^1H$  NMR** (400 MHz,  $CDCl_3$ ):  $\delta$  = 7.92-8.00 (d, 2H,  $J$  =

7.2 Hz), 7.46-7.56 (m, 3H), 7.40-7.46 (m, 2H), 7.23-7.30 (m, 2H), 7.15-7.23 (m, 3H), 7.04-7.12 (dd, 2H,  $J = 8.4$  Hz and 8.4 Hz), 3.09-3.15 (dd, 1H,  $J = 8.0$  Hz and 6.8 Hz), 2.47-2.54 (dd, 1H,  $J = 6.8$  Hz and 5.2 Hz), 1.88-1.94 ppm(dd, 1H,  $J = 8.0$  Hz and 5.2 Hz);  $^{13}\text{C NMR}$  (100 MHz,  $\text{CDCl}_3$ ):  $\delta = 193.4, 163.1, 160.7, 137.7, 136.0, 135.9, 132.9, 131.7, 128.6, 128.2, 128.0, 127.9, 127.6, 127.5, 122.8, 115.7, 115.5, 87.8, 82.3, 38.1, 27.0, 22.5$  ppm; **EI MS** (70 eV):  $m/z$  (%): 340 (6)  $[\text{M}]^+$ , 233 (9), 207 (13), 105 (100), 77 (32), 51 (11); **HRMS** (ESI):  $m/z$  calcd for  $\text{C}_{24}\text{H}_{17}\text{FO}$   $[\text{M}+\text{H}]^+$ : 341.1336; found: 341.1336.

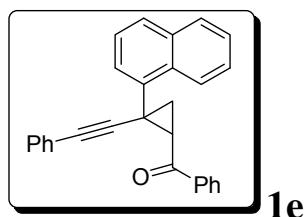

Following the typical experimental procedures **1e** was prepared in 50% yield over two steps from (Z)-2-en-4-yn-1-ol **1e**.  $^1\text{H NMR}$  (400 MHz,  $\text{CDCl}_3$ ):  $\delta = 8.35-8.44$  (d, 1H,  $J = 8.0$  Hz), 8.05-8.14 (d, 2H,  $J = 8.0$  Hz), 7.81-7.88 (d, 1H,  $J = 8.0$  Hz), 7.76-7.81 (d, 1H,  $J = 8.0$  Hz), 7.52-7.61 (m, 2H), 7.35-7.52 (m, 6H), 7.20-7.25 (m, 2H), 7.05-7.13 (m, 2H), 3.28-3.34 (m, 1H), 2.54-2.62 (m, 1H), 1.90-2.00 ppm(m, 1H);  $^{13}\text{C NMR}$  (100 MHz,  $\text{CDCl}_3$ ):  $\delta = 194.1, 138.0, 137.0, 134.0, 133.0, 131.9, 131.7, 128.6, 128.6, 128.5, 128.5, 127.9, 127.6, 126.2, 126.0, 125.7, 125.4, 125.3, 123.2, 89.1, 81.6, 34.0, 28.2, 22.4$  ppm; **EI MS** (70 eV):  $m/z$  (%): 372 (6)  $[\text{M}]^+$ , 267 (0.2), 239 (13), 105 (100), 77 (64), 51 (19); **HRMS** (ESI):  $m/z$  calcd for  $\text{C}_{28}\text{H}_{20}\text{O}$   $[\text{M}+\text{H}]^+$ : 373.1587; found: 373.1580.

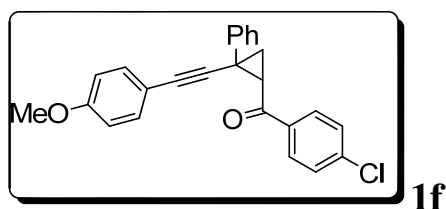

Following the typical experimental procedures **1f** was prepared in 27% yield over two steps from (Z)-2-en-4-yn-1-ol **1f**.  $^1\text{H NMR}$  (400 MHz,  $\text{CDCl}_3$ ):  $\delta = 7.87-7.92$  (d, 2H,  $J = 8.4$  Hz), 7.50-7.56 (d, 2H,  $J = 7.2$  Hz), 7.38-7.46 (m, 4H), 7.30-7.36 (dd, 1H,  $J = 7.2$  Hz and 7.2 Hz), 7.18-7.23 (d, 2H,  $J = 8.8$  Hz), 6.72-6.78 (d, 2H,  $J = 8.8$  Hz), 3.76 (s, 3H), 3.08-3.14 (dd, 1H,  $J = 7.6$  Hz and 6.8 Hz), 2.46-2.54 (dd, 1H,  $J = 6.8$  Hz and 5.2 Hz), 1.94-2.00 ppm(dd, 1H,  $J = 7.6$  Hz and 5.2 Hz);  $^{13}\text{C NMR}$  (100 MHz,  $\text{CDCl}_3$ ):  $\delta = 192.7, 159.4, 140.2, 139.3, 136.2, 133.2, 129.7, 128.9, 128.8, 127.2, 125.7, 115.0, 113.7, 86.1, 82.2, 55.2, 38.3, 27.7, 22.6$  ppm; **EI MS** (70 eV):  $m/z$  (%): 386 (7)  $[\text{M}]^+$ , 254 (12), 247 (73), 139 (100), 111 (77), 75 (36); **HRMS** (ESI):  $m/z$  calcd for  $\text{C}_{25}\text{H}_{19}\text{ClO}_2$   $[\text{M}+\text{H}]^+$ : 387.1146; found: 387.1145.



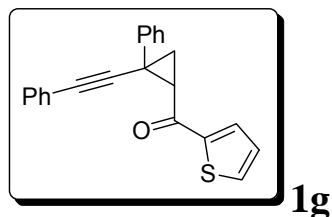

Following the typical experimental procedures **1g** was prepared in 17% yield over two steps from (Z)-2-en-4-yn-1-ol **1g**. **<sup>1</sup>H NMR** (400 MHz, CDCl<sub>3</sub>): δ = 7.67-7.73 (d, 1H, *J* = 3.2 Hz), 7.58-7.65 (d, 1H, *J* = 4.8 Hz), 7.48-7.55 (d, 2H, *J* = 7.6 Hz), 7.36-7.43 (m, 2H), 7.26-7.36 (m, 3H), 7.18-7.26 (m, 3H), 7.08-7.14 (dd, 1H, *J* = 4.4 Hz and 4.4 Hz), 3.06-3.14 (dd, 1H, *J* = 7.6 Hz and 6.8 Hz), 2.43-2.50 (dd, 1H, *J* = 6.8 Hz and 5.2 Hz), 1.92-1.98 ppm(dd, 1H, *J* = 7.6 Hz and 5.2 Hz); **<sup>13</sup>C NMR** (100 MHz, CDCl<sub>3</sub>): δ = 186.0, 145.1, 140.2, 133.4, 131.9, 131.8, 128.7, 128.1, 128.0, 127.8, 127.1, 126.0, 123.0, 88.0, 82.3, 38.4, 27.7, 22.3 ppm; **EI MS** (70 eV): *m/z* (%): 328 (10) [M]<sup>+</sup>, 226 (7), 215 (18), 202 (15), 189 (19), 111 (100); **HRMS** (ESI): *m/z* calcd for C<sub>22</sub>H<sub>16</sub>OS [M+H]<sup>+</sup>: 329.0995; found: 329.0991.

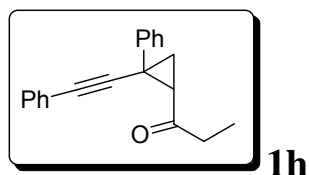

Following the typical experimental procedures **1h** was prepared in 61% yield over two steps from (Z)-2-en-4-yn-1-ol **1h**. **<sup>1</sup>H NMR** (400 MHz, CDCl<sub>3</sub>): δ = 7.46-7.51 (m, 2H), 7.41-7.46 (m, 2H), 7.35-7.41 (m, 2H), 7.26-7.32 (m, 4H), 2.63-2.71 (q, 2H, *J* = 7.2 Hz), 2.57-2.63 (dd, 1H, *J* = 8.0 Hz and 7.2 Hz), 2.27-2.32 (dd, 1H, *J* = 7.2 Hz and 5.2 Hz), 1.77-1.83 (dd, 1H, *J* = 8.0 Hz and 5.2 Hz), 1.15-1.20 ppm(t, 3H, *J* = 7.2 Hz); **<sup>13</sup>C NMR** (100 MHz, CDCl<sub>3</sub>): δ = 204.1, 140.4, 131.7, 128.6, 128.1, 127.9, 127.0, 125.9, 123.1, 88.2, 82.0, 40.2, 37.2, 26.8, 22.5, 7.9 ppm; **EI MS** (70 eV): *m/z* (%): 274 (12) [M]<sup>+</sup>, 245 (12), 217 (100), 202 (58), 189 (34), 57 (68); **HRMS** (ESI): *m/z* calcd for C<sub>20</sub>H<sub>18</sub>O [M+H]<sup>+</sup>: 275.1430; found: 275.1438.

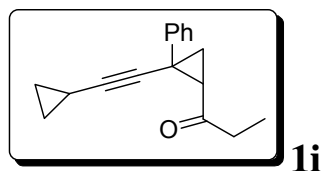

Following the typical experimental procedures **1i** was prepared in 64% yield over two steps from (Z)-2-en-4-yn-1-ol **1i**. **<sup>1</sup>H NMR** (400 MHz, CDCl<sub>3</sub>): δ = 7.34-7.39 (m, 2H), 7.29-7.39 (m, 2H), 7.20-7.26 (m, 1H), 2.53-2.61 (q, 2H, *J* = 7.2 Hz), 2.37-2.44 (dd, 1H, *J* = 7.6 Hz and 7.6 Hz), 2.05-2.10 (dd, 1H, *J* = 7.6 Hz and 5.2 Hz), 1.58-1.64 (dd, 1H, *J* = 7.6 Hz and 5.2 Hz), 1.18-1.26 (m, 1H), 1.09-1.15 (t, 3H, *J* = 7.2 Hz), 0.70-0.75 (m, 2H), 0.60-0.66 ppm(m, 2H); **<sup>13</sup>C NMR** (100 MHz, CDCl<sub>3</sub>): δ = 204.4, 141.1, 128.4, 126.7, 125.8, 85.6, 73.5, 39.9, 37.1, 26.4, 22.3, 8.4, 8.3, 7.8, 0.0 ppm; **EI MS** (70 eV): *m/z* (%):

238 (11)  $[M]^+$ , 237 (12), 209 (22), 181 (78), 165 (89), 57 (100); **HRMS** (ESI):  $m/z$  calcd for  $C_{17}H_{18}O$   $[M+H]^+$ : 239.1430; found: 239.1434.

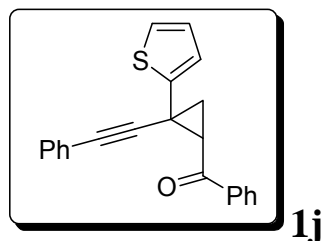

Following the typical experimental procedures **1j** was prepared in 54% yield over two steps from (Z)-2-en-4-yn-1-ol **1j**.  **$^1H$  NMR** (400 MHz,  $CDCl_3$ ):  $\delta$  = 7.98-8.03 (d, 2H,  $J$  = 7.6 Hz), 7.54-7.60 (m, 1H), 7.44-7.52 (m, 3H), 7.30-7.35 (m, 2H), 7.24-7.30 (m, 3H), 7.17-7.24 (m, 1H), 7.11-7.15 (m, 1H), 3.23-3.30 (dd, 1H,  $J$  = 7.6 Hz and 7.6 Hz), 2.54-2.60 (dd, 1H,  $J$  = 7.6 Hz and 5.2 Hz), 1.91-1.97 ppm (dd, 1H,  $J$  = 7.6 Hz and 5.2 Hz);  **$^{13}C$  NMR** (100 MHz,  $CDCl_3$ ):  $\delta$  = 193.2, 146.0, 137.7, 133.0, 131.8, 128.6, 128.4, 128.3, 128.0, 127.2, 123.9, 123.8, 122.7, 87.4, 81.7, 39.7, 24.6, 24.5 ppm; **EI MS** (70 eV):  $m/z$  (%): 328 (2)  $[M]^+$ , 255 (21), 223 (8), 192 (12), 160 (30), 43 (100); **HRMS** (ESI):  $m/z$  calcd for  $C_{22}H_{16}OS$   $[M+H]^+$ : 329.0995; found: 329.0989.

### 2.3 Spectroscopic and analytical data of the products **2a** to **2i**, **4a**, **4i**

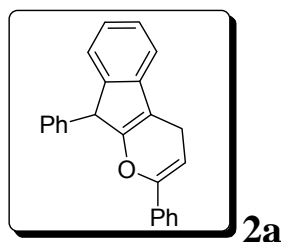

**$^1H$  NMR** (400 MHz,  $CDCl_3$ ):  $\delta$  = 7.48-7.55 (m, 2H), 7.22-7.36 (m, 9H), 7.17-7.22 (d, 1H,  $J$  = 7.2 Hz), 7.13-7.17 (d, 1H,  $J$  = 7.2 Hz), 7.08-7.13 (dd, 1H,  $J$  = 7.2 Hz and 7.2 Hz), 5.57-5.63 (dd, 1H,  $J$  = 3.2 Hz and 3.2 Hz), 4.66 (s, 1H), 3.33-3.39 ppm (dd, 2H,  $J$  = 5.6 Hz and 3.2 Hz);  **$^{13}C$  NMR** (100 MHz,  $CDCl_3$ ):  $\delta$  = 157.6, 149.9, 142.7, 141.7, 137.8, 134.3, 128.7, 128.3, 128.2, 128.1, 127.1, 127.0, 124.5, 124.1, 123.5, 117.7, 110.9, 97.3, 52.8, 20.2 ppm; **EI MS** (70 eV):  $m/z$  (%): 322 (18)  $[M]^+$ , 217 (14), 191 (18), 149 (70), 105 (100), 77 (49); **HRMS** (APCI):  $m/z$  calcd for  $C_{24}H_{18}O$   $[M+H]^+$ : 323.1430; found: 323.1431.

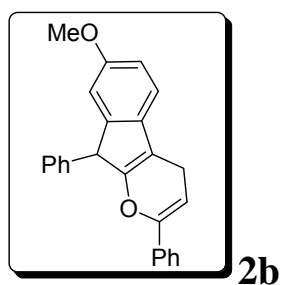

**$^1H$  NMR** (400 MHz,  $CDCl_3$ ):  $\delta$  = 7.47-7.52 (d, 2H,  $J$  = 6.4 Hz), 7.20-7.34 (m, 8H), 7.00-7.05 (d, 1H,  $J$  = 8.8 Hz), 6.78-6.83 (m, 2H), 5.53-5.58 (dd, 1H,  $J$  = 3.2 Hz and 3.2 Hz),

4.62 (s, 1H), 3.75 (s, 3H), 3.30-3.35 ppm(dd, 2H,  $J = 5.6$  Hz and 3.2 Hz);  $^{13}\text{C NMR}$  (100 MHz,  $\text{CDCl}_3$ ):  $\delta = 157.5, 155.7, 149.8, 143.4, 138.0, 135.5, 134.4, 128.7, 128.2, 128.1, 127.0, 124.5, 117.9, 111.7, 111.3, 110.5, 97.1, 55.6, 52.8, 20.3$  ppm; **EI MS** (70 eV):  $m/z$  (%): 352 (27)  $[\text{M}]^+$ , 247 (17), 222 (11), 179 (18), 149 (50), 105 (100); **HRMS** (APCI):  $m/z$  calcd for  $\text{C}_{25}\text{H}_{20}\text{O}_2$   $[\text{M}+\text{H}]^+$ : 353.1536; found: 353.1542.

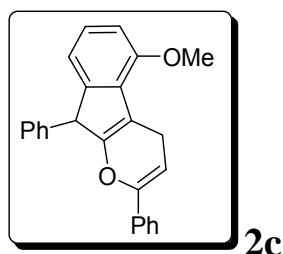

$^1\text{H NMR}$  (400 MHz,  $\text{CDCl}_3$ ):  $\delta = 7.46$ -7.50 (d, 2H,  $J = 7.2$  Hz), 7.20-7.33 (m, 8H), 6.98-7.04 (dd, 1H,  $J = 8.4$  Hz and 7.2 Hz), 6.76-6.83 (dd, 2H,  $J = 8.4$  Hz and 7.2 Hz), 5.48-5.55 (dd, 1H,  $J = 3.6$  Hz and 3.6 Hz), 4.56 (s, 1H), 3.83 (s, 3H), 3.59-3.63 ppm(m, 2H);  $^{13}\text{C NMR}$  (100 MHz,  $\text{CDCl}_3$ ):  $\delta = 155.9, 153.5, 149.3, 143.3, 138.0, 134.4, 130.5, 128.7, 128.2, 128.1, 127.0, 125.0, 124.4, 116.8, 110.5, 110.0, 98.2, 55.6, 53.1, 20.8$  ppm; **EI MS** (70 eV):  $m/z$  (%): 352 (17)  $[\text{M}]^+$ , 247 (17), 207 (26), 133 (24), 105 (100), 77 (38); **HRMS** (APCI):  $m/z$  calcd for  $\text{C}_{25}\text{H}_{20}\text{O}_2$   $[\text{M}+\text{H}]^+$ : 353.1536; found: 353.1540.

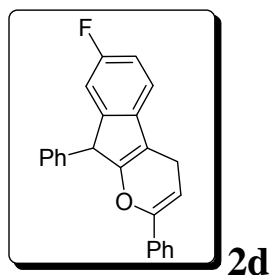

$^1\text{H NMR}$  (400 MHz,  $\text{CDCl}_3$ ):  $\delta = 7.46$ -7.51 (m, 2H), 7.25-7.35 (m, 4H), 7.18-7.25 (m, 4H), 7.00-7.05 (m, 1H), 6.95-7.00 (m, 1H), 6.88-6.95 (m, 1H), 5.53-5.58 (dd, 1H,  $J = 3.2$  Hz and 3.2 Hz), 4.61 (s, 1H), 3.29-3.34 ppm(dd, 2H,  $J = 6.0$  Hz and 3.2 Hz);  $^{13}\text{C NMR}$  (100 MHz,  $\text{CDCl}_3$ ):  $\delta = 162.1, 159.7, 156.9, 156.8, 149.8, 143.7, 143.6, 138.4, 138.4, 137.2, 134.2, 128.8, 128.3, 128.2, 128.1, 127.3, 124.5, 118.1, 118.0, 113.6, 113.4, 112.0, 111.7, 110.4, 97.1, 52.9, 52.8, 20.2$  ppm; **EI MS** (70 eV):  $m/z$  (%): 340 (40)  $[\text{M}]^+$ , 233 (16), 209 (37), 133 (23), 105 (100), 77 (72); **HRMS** (APCI):  $m/z$  calcd for  $\text{C}_{24}\text{H}_{17}\text{FO}$   $[\text{M}+\text{H}]^+$ : 341.1336; found: 341.1340.

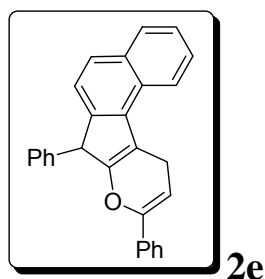

**<sup>1</sup>H NMR** (400 MHz, CDCl<sub>3</sub>): δ = 8.25-8.30 (d, 1H, *J* = 7.6 Hz), 7.80-7.88 (d, 1H, *J* = 8.0 Hz), 7.58-7.63 (d, 1H, *J* = 7.6 Hz), 7.49-7.58 (m, 3H), 7.39-7.49 (m, 3H), 7.20-7.39 (m, 7H), 5.59-5.64 (dd, 1H, *J* = 3.2 Hz and 3.2 Hz), 4.70 (s, 1H), 4.00-4.06 ppm(m, 2H); **<sup>13</sup>C NMR** (100 MHz, CDCl<sub>3</sub>): δ = 158.7, 149.4, 138.4, 138.3, 137.3, 134.1, 133.7, 128.9, 128.7, 128.6, 128.3, 128.2, 127.1, 126.7, 125.3, 125.0, 124.5, 124.2, 123.8, 122.0, 111.6, 97.3, 53.3, 24.3 ppm; **EI MS** (70 eV): *m/z* (%): 372 (9) [M]<sup>+</sup>, 241 (15), 180 (15), 165 (20), 105 (100), 77 (73); **HRMS** (APCI): *m/z* calcd for C<sub>28</sub>H<sub>20</sub>O [M+H]<sup>+</sup>: 373.1587; found: 373.1586.

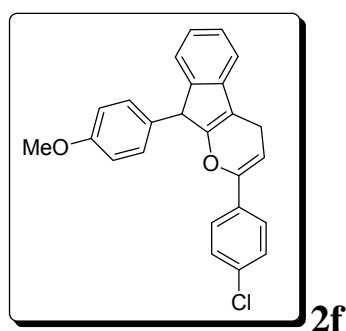

**<sup>1</sup>H NMR** (400 MHz, CDCl<sub>3</sub>): δ = 7.40-7.46 (d, 2H, *J* = 8.4 Hz), 7.23-7.30 (m, 2H), 7.08-7.20 (m, 6H), 6.82-6.88 (d, 2H, *J* = 8.4 Hz), 5.53-5.58 (dd, 1H, *J* = 3.2 Hz and 3.2 Hz), 4.59 (s, 1H), 3.78 (s, 3H), 3.27-3.35 ppm(m, 2H); **<sup>13</sup>C NMR** (100 MHz, CDCl<sub>3</sub>): δ = 158.7, 157.6, 149.0, 142.5, 141.9, 134.0, 132.8, 129.5, 129.1, 128.4, 127.1, 125.8, 124.2, 123.5, 117.7, 114.1, 110.6, 97.8, 55.2, 52.0, 20.1 ppm; **EI MS** (70 eV): *m/z* (%): 386 (29) [M]<sup>+</sup>, 276 (4), 247 (100), 178 (56), 136 (66); **HRMS** (APCI): *m/z* calcd for C<sub>25</sub>H<sub>19</sub>ClO<sub>2</sub> [M+H]<sup>+</sup>: 387.1146; found: 387.1150.

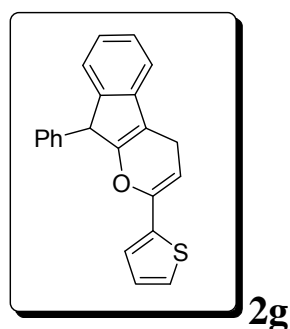

**<sup>1</sup>H NMR** (400 MHz, CDCl<sub>3</sub>): δ = 7.28-7.35 (m, 3H), 7.19-7.28 (m, 3H), 7.08-7.19 (m, 5H), 6.91-6.97 (dd, 1H, *J* = 4.0 Hz and 4.0 Hz), 5.42-5.52 (dd, 1H, *J* = 3.2 Hz and 3.2 Hz), 4.64 (s, 1H), 3.26-3.37 ppm(m, 2H); **<sup>13</sup>C NMR** (100 MHz, CDCl<sub>3</sub>): δ = 157.2, 145.8, 142.6, 141.5, 137.9, 137.6, 128.6, 128.1, 127.2, 127.1, 127.1, 124.6, 124.2, 123.6, 123.4, 117.7, 110.9, 96.7, 52.6, 20.0 ppm; **EI MS** (70 eV): *m/z* (%): 328 (81) [M]<sup>+</sup>, 217 (31), 191 (69), 165 (21), 111 (100); **HRMS** (APCI): *m/z* calcd for C<sub>22</sub>H<sub>16</sub>OS [M+H]<sup>+</sup>: 329.0995; found: 329.0993.

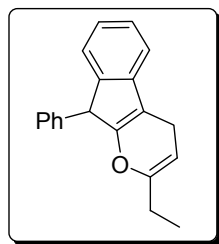

**2h**

**<sup>1</sup>H NMR** (400 MHz, CDCl<sub>3</sub>): δ = 7.20-7.31 (m, 4H), 7.14-7.20 (m, 2H), 7.10-7.14 (m, 1H), 7.01-7.09 (m, 2H), 4.74-4.80 (m, 1H), 4.51 (s, 1H), 3.11-3.19 (m, 2H), 2.07-2.15 (q, 2H, *J* = 7.6 Hz), 0.99-1.05 ppm(t, 3H, *J* = 7.6 Hz); **<sup>13</sup>C NMR** (100 MHz, CDCl<sub>3</sub>): δ = 157.6, 154.0, 142.9, 141.7, 138.0, 128.6, 128.1, 127.0, 126.9, 123.8, 123.3, 117.4, 111.1, 94.7, 52.6, 26.3, 19.7, 11.3 ppm; **EI MS** (70 eV): *m/z* (%): 274 (69) [M]<sup>+</sup>, 217 (100), 202 (31), 189 (21), 57 (87); **HRMS** (APCI): *m/z* calcd for C<sub>20</sub>H<sub>18</sub>O [M+H]<sup>+</sup>: 275.1430; found: 275.1428.

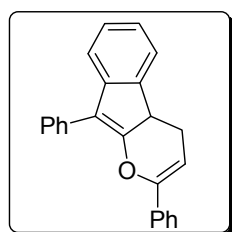

**4a**

**<sup>1</sup>H NMR** (400 MHz, CDCl<sub>3</sub>): δ = 7.77-7.82 (d, 2H, *J* = 8.0 Hz), 7.64-7.70 (d, 2H, *J* = 7.2 Hz), 7.55-7.60 (d, 1H, *J* = 7.6 Hz), 7.47-7.55 (dd, 2H, *J* = 7.6 Hz and 7.6 Hz), 7.42-7.47 (d, 1H, *J* = 7.6 Hz), 7.28-7.42 (m, 4H), 7.18-7.24 (dd, 1H, *J* = 7.6 Hz and 7.6 Hz), 5.62-5.68 (dd, 1H, *J* = 6.8 Hz and 2.4 Hz), 3.47-3.55 (dd, 1H, *J* = 12.8 Hz and 8.0 Hz), 2.97-3.08 (ddd, 1H, *J* = 16.8 Hz, 8.0 Hz and 6.8 Hz), 2.18-2.28 ppm(ddd, 1H, *J* = 16.8 Hz, 12.8 Hz and 2.4 Hz); **<sup>13</sup>C NMR** (100 MHz, CDCl<sub>3</sub>): δ = 156.3, 150.9, 143.2, 140.4, 134.1, 132.8, 128.6, 128.5, 128.4, 128.4, 127.2, 126.9, 124.6, 123.7, 122.9, 119.5, 116.8, 95.8, 39.6, 23.8 ppm; **EI MS** (70 eV): *m/z* (%): 322 (27) [M]<sup>+</sup>, 217 (13), 178 (17), 115 (25), 105 (100), 77 (45).

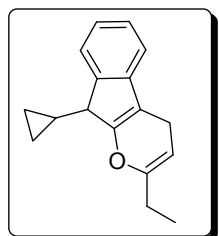

**2i and**

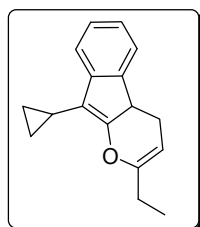

**4i**

**<sup>1</sup>H NMR** (400 MHz, CDCl<sub>3</sub>): δ = 7.20-7.45 (m, 7H), 7.06-7.18 (m, 2H), 6.98-7.06 (d, 1H, *J* = 7.6 Hz), 4.72-4.77 (m, 1H), 4.66-4.72 (m, 1H), 3.10-3.19 (dd, 1H, *J* = 12.4 Hz and 8.0 Hz), 3.03-3.10 (m, 2H), 2.78-2.83 (d, 1H, *J* = 8.4 Hz), 2.60-2.70 (m, 1H), 2.13-2.35 (m, 5H), 1.80-1.90 (m, 1H), 1.58-1.68 (m, 1H), 1.10-1.20 (m, 6H), 0.80-1.00 (m, 4H), 0.48-0.65 ppm(m, 4H); **<sup>13</sup>C NMR** (100 MHz, CDCl<sub>3</sub>): δ = 158.5, 155.6, 154.8, 153.7, 145.1, 142.9, 141.1, 140.3, 126.9, 126.9, 123.3, 123.0, 122.6, 122.2, 118.5, 117.1, 115.8, 109.6, 94.7,

92.8, 49.9, 39.4, 26.5, 26.4, 23.2, 19.5, 11.6, 11.6, 11.4, 5.5, 4.8, 4.7, 2.3, 2.3 ppm; **EI MS** (70 eV):  $m/z$  (%): 238 (82)  $[M]^+$ , 181 (53), 165 (24), 153 (20), 141 (29), 128 (14), 115 (26), 57 (100), 41 (64). **HRMS** (APCI):  $m/z$  calcd for  $C_{17}H_{18}O$   $[M+H]^+$ : 239.1430; found: 239.1425.

## 2.4 Spectroscopic and analytical data of the products 3a to 3j, 5i

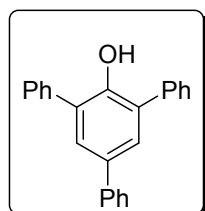

**3a**

**$^1H$  NMR** (400 MHz,  $CDCl_3$ ):  $\delta$  = 7.60-7.65 (m, 6H), 7.52-7.56 (m, 2H), 7.48-7.52 (m, 4H), 7.39-7.46 (m, 4H), 7.30-7.36 (dd, 1H,  $J$  = 7.2 Hz and 7.2 Hz), 5.45 ppm(s, 1H);  **$^{13}C$  NMR** (100 MHz,  $CDCl_3$ ):  $\delta$  = 148.9, 140.5, 137.5, 133.8, 129.4, 129.1, 128.9, 128.8, 128.6, 127.8, 126.9, 126.8 ppm; **EI MS** (70 eV):  $m/z$  (%): 322 (100)  $[M]^+$ , 215 (16), 149 (39), 129 (20), 105 (46), 57 (35); **HRMS** (ESI negative):  $m/z$  calcd for  $C_{24}H_{18}O$   $[M-H]^+$ : 321.1285; found: 321.1287. This known compound has been reported in reference 3.

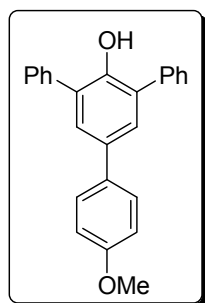

**3b**

**$^1H$  NMR** (400 MHz,  $CDCl_3$ ):  $\delta$  = 7.59-7.64 (d, 4H,  $J$  = 7.2 Hz), 7.53-7.58 (d, 2H,  $J$  = 8.8 Hz), 7.46-7.53 (m, 6H), 7.38-7.46 (dd, 2H,  $J$  = 7.6 Hz and 7.6 Hz), 6.95-7.00 (d, 2H,  $J$  = 8.4 Hz), 5.39 (s, 1H), 3.85 ppm(s, 3H);  **$^{13}C$  NMR** (100 MHz,  $CDCl_3$ ):  $\delta$  = 158.9, 148.5, 137.6, 133.5, 133.2, 129.4, 129.1, 128.9, 128.2, 127.8, 127.7, 114.2, 55.4 ppm; **EI MS** (70 eV):  $m/z$  (%): 352 (21)  $[M]^+$ , 236 (31), 208 (39), 193 (31), 129 (47), 41 (100); **HRMS** (ESI negative):  $m/z$  calcd for  $C_{25}H_{20}O_2$   $[M-H]^+$ : 351.1391; found: 351.1385. This known compound has been reported in reference 4.

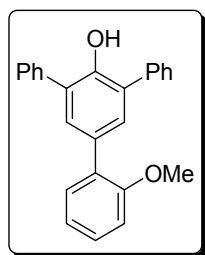

**3c**

**$^1H$  NMR** (400 MHz,  $CDCl_3$ ):  $\delta$  = 7.60-7.65 (d, 4H,  $J$  = 7.2 Hz), 7.46-7.52 (m, 6H),

7.37-7.43 (m, 3H), 7.28-7.34 (m, 1H), 6.97-7.06 (m, 2H), 5.46 (s, 1H), 3.84 ppm(s, 3H);  $^{13}\text{C NMR}$  (100 MHz,  $\text{CDCl}_3$ ):  $\delta$  = 156.4, 148.5, 137.7, 131.1, 130.9, 130.7, 129.9, 129.4, 128.8, 128.4, 128.3, 127.6, 120.8, 111.1, 55.6 ppm; **EI MS** (70 eV):  $m/z$  (%): 352 (52)  $[\text{M}]^+$ , 149 (100), 135 (76), 77 (51), 57 (83), 43 (75); **HRMS** (ESI negative):  $m/z$  calcd for  $\text{C}_{25}\text{H}_{20}\text{O}_2$   $[\text{M}-\text{H}]^+$ : 351.1391; found: 351.1384.

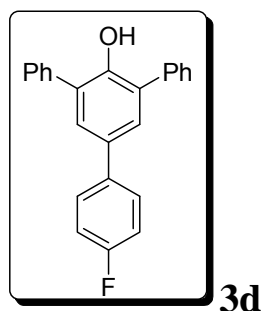

$^1\text{H NMR}$  (400 MHz,  $\text{CDCl}_3$ ):  $\delta$  = 7.60-7.65 (d, 4H,  $J$  = 7.6 Hz), 7.54-7.60 (m, 2H), 7.47-7.54 (m, 6H), 7.40-7.47 (m, 2H), 7.09-7.15 (dd, 2H,  $J$  = 8.8 Hz and 8.8 Hz), 5.45 ppm(s, 1H);  $^{13}\text{C NMR}$  (100 MHz,  $\text{CDCl}_3$ ):  $\delta$  = 163.4, 161.0, 148.9, 137.4, 136.7, 136.6, 132.9, 129.3, 129.2, 128.9, 128.5, 128.3, 128.2, 127.9, 115.7, 115.5 ppm; **EI MS** (70 eV):  $m/z$  (%): 340 (100)  $[\text{M}]^+$ , 149 (29), 133 (39), 105 (75), 77 (62), 41 (82); **HRMS** (ESI negative):  $m/z$  calcd for  $\text{C}_{24}\text{H}_{17}\text{FO}$   $[\text{M}-\text{H}]^+$ : 339.1191; found: 339.1186.

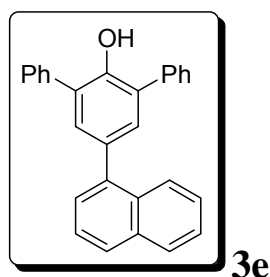

$^1\text{H NMR}$  (400 MHz,  $\text{CDCl}_3$ ):  $\delta$  = 8.09-8.14 (d, 1H,  $J$  = 8.0 Hz), 7.90-7.94 (m, 1H), 7.84-7.88 (m, 1H), 7.63-7.69 (m, 4H), 7.44-7.56 (m, 10H), 7.38-7.44 (m, 2H), 5.56 ppm(s, 1H);  $^{13}\text{C NMR}$  (100 MHz,  $\text{CDCl}_3$ ):  $\delta$  = 148.7, 139.5, 137.4, 133.9, 133.2, 131.7, 131.5, 129.4, 128.9, 128.6, 128.3, 127.8, 127.5, 127.0, 126.1, 126.0, 125.7, 125.4 ppm; **EI MS** (70 eV):  $m/z$  (%): 372 (32)  $[\text{M}]^+$ , 322 (21), 105 (92), 91 (32), 77 (53), 43 (100); **HRMS** (ESI negative):  $m/z$  calcd for  $\text{C}_{28}\text{H}_{20}\text{O}$   $[\text{M}-\text{H}]^+$ : 371.1441; found: 371.1437.

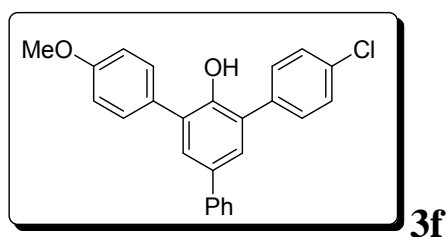

$^1\text{H NMR}$  (400 MHz,  $\text{CDCl}_3$ ):  $\delta$  = 7.55-7.63 (m, 4H), 7.39-7.53 (m, 8H), 7.29-7.35 (m, 1H), 7.03-7.08 (d, 2H,  $J$  = 8.8 Hz), 5.38 (s, 1H), 3.88 ppm(s, 3H);  $^{13}\text{C NMR}$  (100 MHz,  $\text{CDCl}_3$ ):  $\delta$  = 159.5, 148.9, 140.4, 136.3, 134.0, 133.5, 130.8, 130.5, 129.1, 129.0, 128.8, 128.8,

128.7, 128.3, 127.8, 127.0, 126.8, 114.7, 55.4 ppm; **EI MS** (70 eV):  $m/z$  (%): 386 (8)  $[M]^+$ , 223 (5), 205 (4), 149 (100), 69 (48), 57 (64); **HRMS** (ESI negative):  $m/z$  calcd for  $C_{25}H_{19}ClO_2$   $[M-H]^+$ : 385.1001; found: 385.0996.

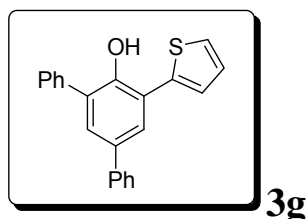

**$^1H$  NMR** (400 MHz,  $CDCl_3$ ):  $\delta$  = 7.64-7.68 (d, 1H,  $J$  = 8.0 Hz), 7.54-7.58 (dd, 1H,  $J$  = 3.6 Hz and 1.2 Hz), 7.29-7.38 (m, 4H), 7.20-7.23 (m, 2H), 7.12-7.18 (m, 4H), 7.05-7.11 (m, 3H), 5.64 ppm (s, 1H);  **$^{13}C$  NMR** (100 MHz,  $CDCl_3$ ):  $\delta$  = 149.1, 141.3, 140.7, 139.4, 134.9, 131.1, 129.6, 129.1, 128.1, 128.0, 127.7, 127.5, 127.3, 126.5, 125.8, 125.5, 122.4, 120.3 ppm; **EI MS** (70 eV):  $m/z$  (%): 328 (100)  $[M]^+$ , 215 (15), 191 (14), 111 (27), 45 (25); **HRMS** (ESI negative):  $m/z$  calcd for  $C_{22}H_{16}OS$   $[M-H]^+$ : 327.0849; found: 327.0853.

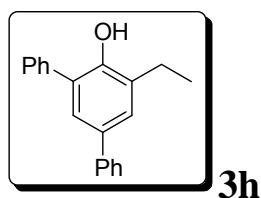

**$^1H$  NMR** (400 MHz,  $CDCl_3$ ):  $\delta$  = 7.57-7.63 (d, 2H,  $J$  = 7.6 Hz), 7.50-7.57 (m, 4H), 7.39-7.47 (m, 4H), 7.29-7.37 (m, 2H), 5.30 (s, 1H), 2.76-2.83 (q, 2H,  $J$  = 7.6 Hz), 1.30-1.40 ppm (t, 3H,  $J$  = 7.6 Hz);  **$^{13}C$  NMR** (100 MHz,  $CDCl_3$ ):  $\delta$  = 149.8, 141.0, 137.3, 133.5, 131.0, 129.4, 129.2, 128.7, 128.1, 128.0, 127.6, 126.8, 126.6, 126.4, 23.6, 14.1 ppm; **EI MS** (70 eV):  $m/z$  (%): 274 (100)  $[M]^+$ , 259 (37), 244 (16), 215 (16), 152 (9), 77 (13); **HRMS** (ESI negative):  $m/z$  calcd for  $C_{20}H_{18}O$   $[M-H]^+$ : 273.1285; found: 273.1288.

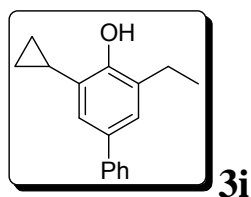

**$^1H$  NMR** (400 MHz,  $CDCl_3$ ):  $\delta$  = 7.51-7.56 (d, 2H,  $J$  = 7.2 Hz), 7.38-7.44 (dd, 2H,  $J$  = 8.0 Hz and 7.2 Hz), 7.27-7.32 (m, 2H), 7.19-7.24 (m, 1H), 5.62 (s, 1H), 2.70-2.78 (q, 2H,  $J$  = 7.6 Hz), 1.80-1.89 (m, 1H), 1.25-1.32 (t, 3H,  $J$  = 7.6 Hz), 0.98-1.04 (m, 2H), 0.69-0.74 ppm (m, 2H);  **$^{13}C$  NMR** (100 MHz,  $CDCl_3$ ):  $\delta$  = 153.0, 141.4, 133.1, 129.9, 128.6, 126.9, 126.8, 126.5, 125.5, 23.3, 14.1, 9.6, 5.2 ppm; **EI MS** (70 eV):  $m/z$  (%): 238 (17)  $[M]^+$ , 203 (18), 159 (22), 145 (21), 133 (100), 105 (74); **HRMS** (ESI negative):  $m/z$  calcd for  $C_{17}H_{18}O$   $[M-H]^+$ : 237.1285; found: 237.1292.



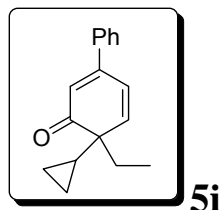

**<sup>1</sup>H NMR** (400 MHz, CDCl<sub>3</sub>): δ = 7.38-7.43 (m, 4H), 7.30-7.38 (m, 2H), 6.14-6.18 (m, 2H), 2.12-2.23 (m, 1H), 1.68-1.78 (m, 1H), 1.09-1.18 (m, 1H), 0.74-0.80 (t, 3H, *J* = 7.6 Hz), 0.38-0.46 (m, 2H), 0.28-0.38 (m, 1H), 0.13-0.20 ppm(m, 1H); **<sup>13</sup>C NMR** (100 MHz, CDCl<sub>3</sub>): δ = 205.4, 142.6, 139.0, 138.6, 135.9, 128.8, 127.9, 127.0, 125.7, 54.1, 32.3, 20.2, 9.6, 0.5, 0.1 ppm; **EI MS** (70 eV): *m/z* (%): 238 (40) [M]<sup>+</sup>, 223 (32), 209 (36), 181 (48), 165 (59), 39 (100). **HRMS** (APCI): *m/z* calcd for C<sub>17</sub>H<sub>18</sub>O [M+H]<sup>+</sup>: 239.1430; found: 239.1434.

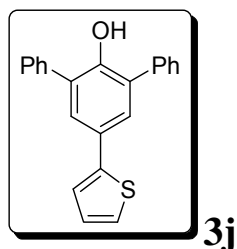

**<sup>1</sup>H NMR** (400 MHz, CDCl<sub>3</sub>): δ = 7.60-7.67 (d, 4H, *J* = 7.6 Hz), 7.50-7.60 (m, 6H), 7.42-7.50 (m, 2H), 7.25-7.30 (m, 2H), 7.07-7.13 (dd, 1H, *J* = 4.0 Hz and 4.0 Hz), 5.46 ppm(s, 1H); **<sup>13</sup>C NMR** (100 MHz, CDCl<sub>3</sub>): δ = 149.0, 143.9, 137.2, 129.3, 129.2, 128.9, 128.0, 127.9, 127.6, 127.4, 124.1, 122.4 ppm; **EI MS** (70 eV): *m/z* (%): 328 (8) [M]<sup>+</sup>, 255 (11), 212 (17), 184 (25), 160 (15), 43 (100); **HRMS** (ESI negative): *m/z* calcd for C<sub>22</sub>H<sub>16</sub>OS [M-H]<sup>-</sup>: 327.0849; found: 327.0854.

## References

- 1 S.-H. Wang, Y.-Q. Tu, P. Chen, X.-D. Hu, F.-M. Zhang and A.-X. Wang, *J. Org. Chem.* **2006**, *71*, 4343.
- 2 B. Gabriele, G. Salerno and E. Lauria, *J. Org. Chem.* **1999**, *64*, 7687 and references therein.
- 3 L. Liu, Y. Zhang and B. Xin, *J. Org. Chem.* **2006**, *71*, 3994.
- 4 D. Karl, U. Wilfried and T. Heinz, *Chem. Ber.* **1967**, *100*, 132.

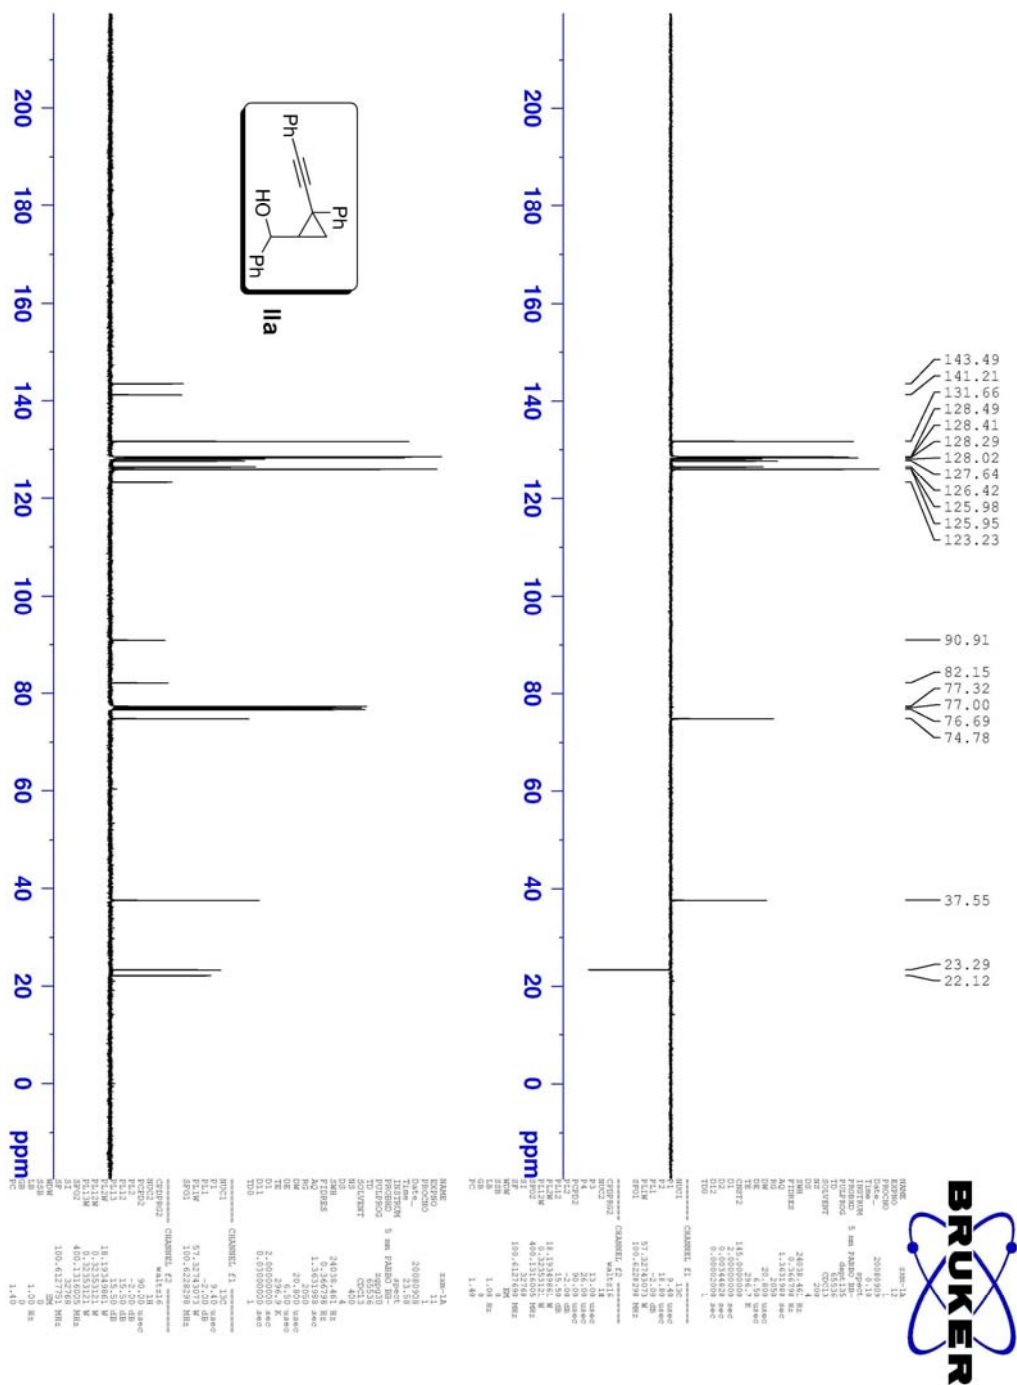

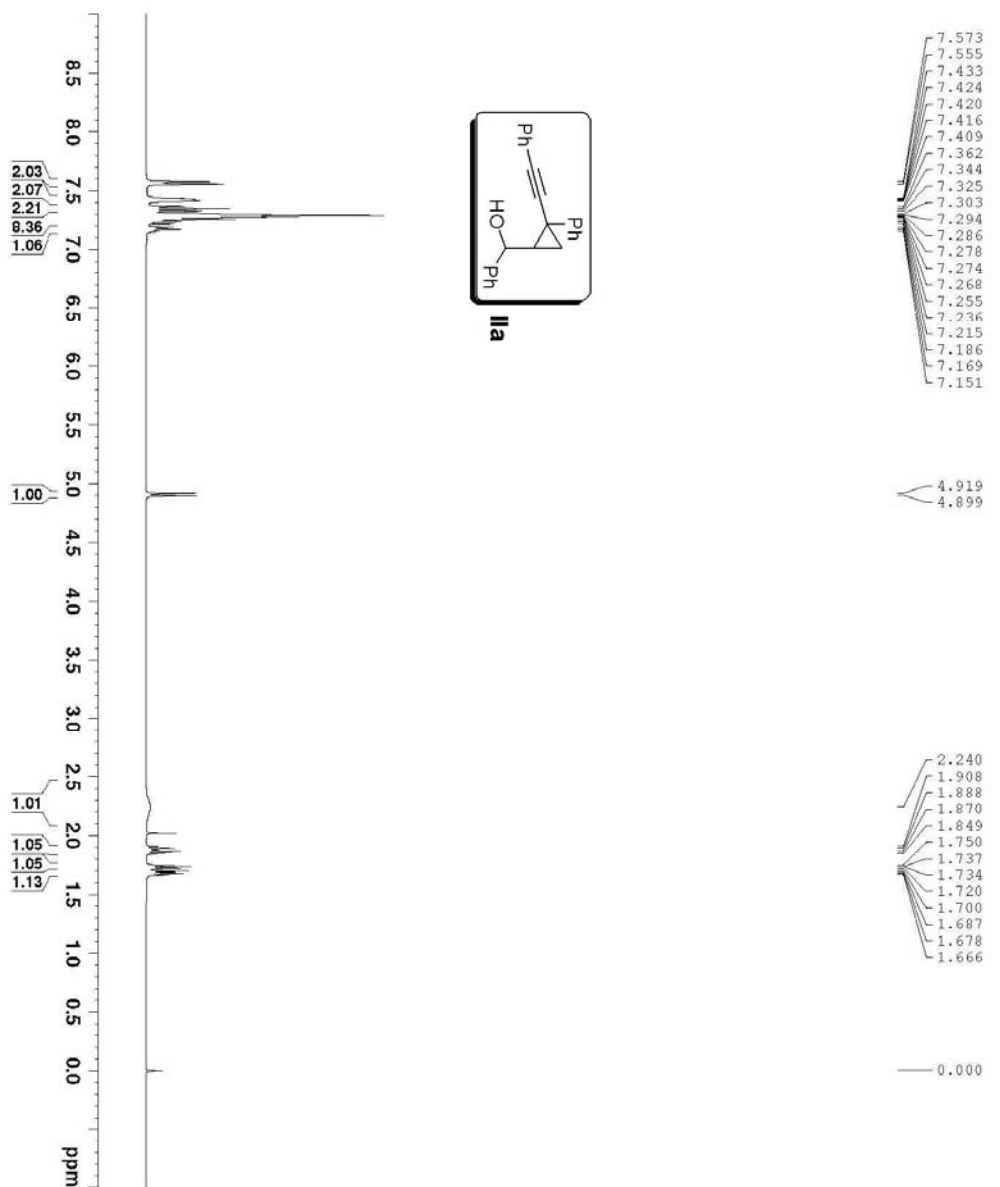

```

NAME          zsm-1A
EXPNO         10
PROCNO        20080908
Date_         23.34
Time          23.34
INSTRUM       spect
PROBHD        5 mm PABBO BB-
PULPROG       zgpg30
TD            65536
SOLVENT       CDCl3
NS            16
DS            2
SWH           8223.685 Hz
F2           0.121485 Hz
AQ            3.9846387 sec
RG            101
DW            60.800 usec
DE            2.50 usec
TE            29.99
D1            1.00000000 sec
TDO           1

===== CHANNEL f1 =====
NUC1          13C
P1            14.60 usec
PL1           0.00 dB
PL1W          11.47932053 W
SFO1          400.1324170 MHz
SI            32
SF            400.1300227 MHz
WDW           EM
SSB           0
LB            0.30 Hz
GB            0
PC            1.00
    
```

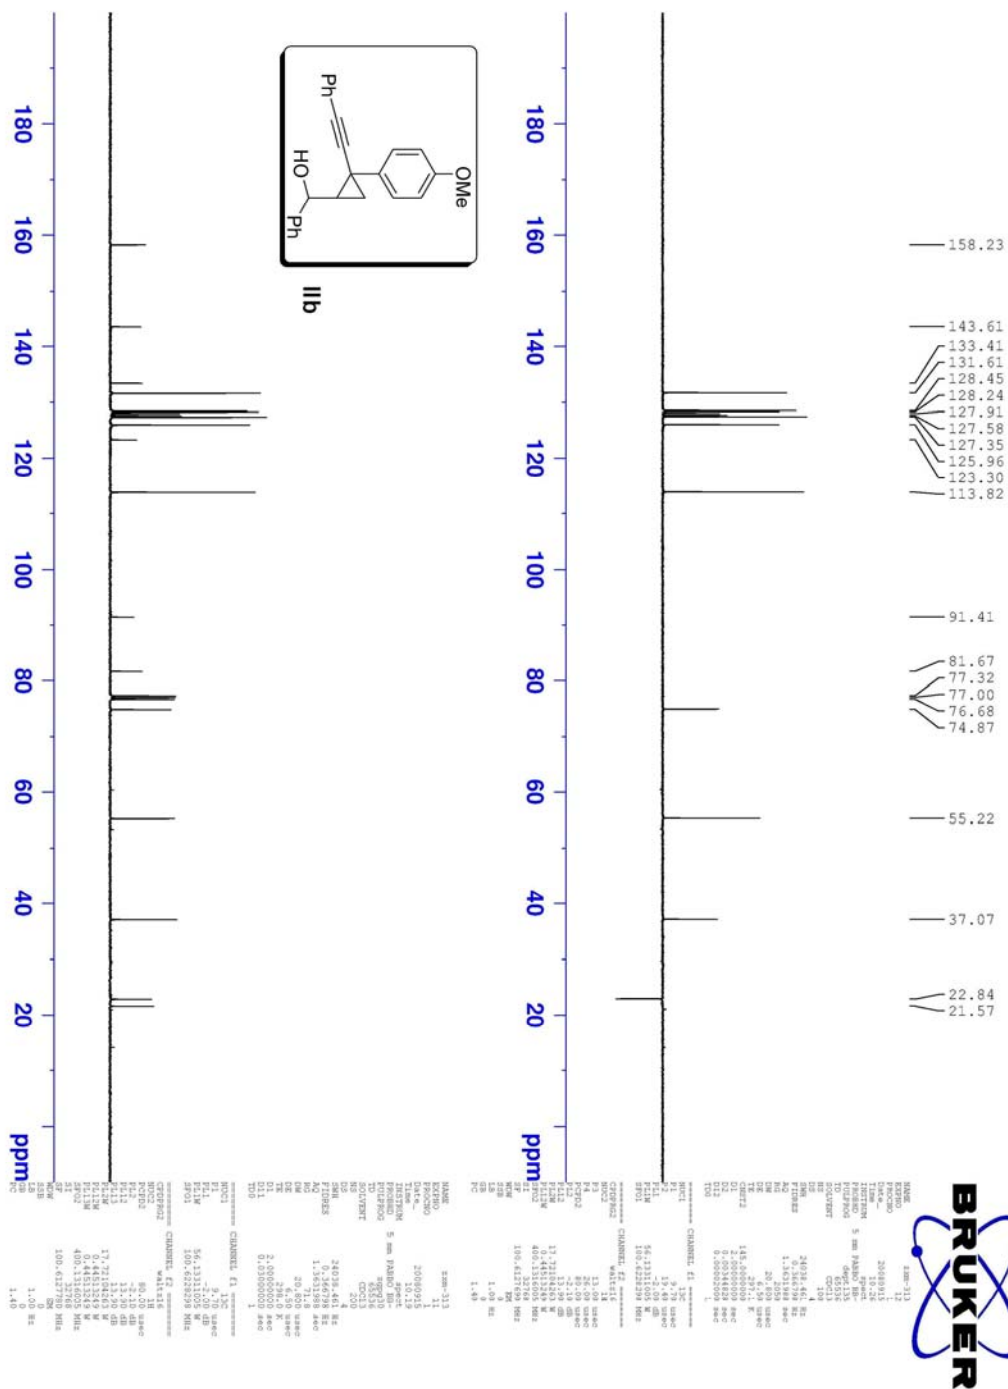

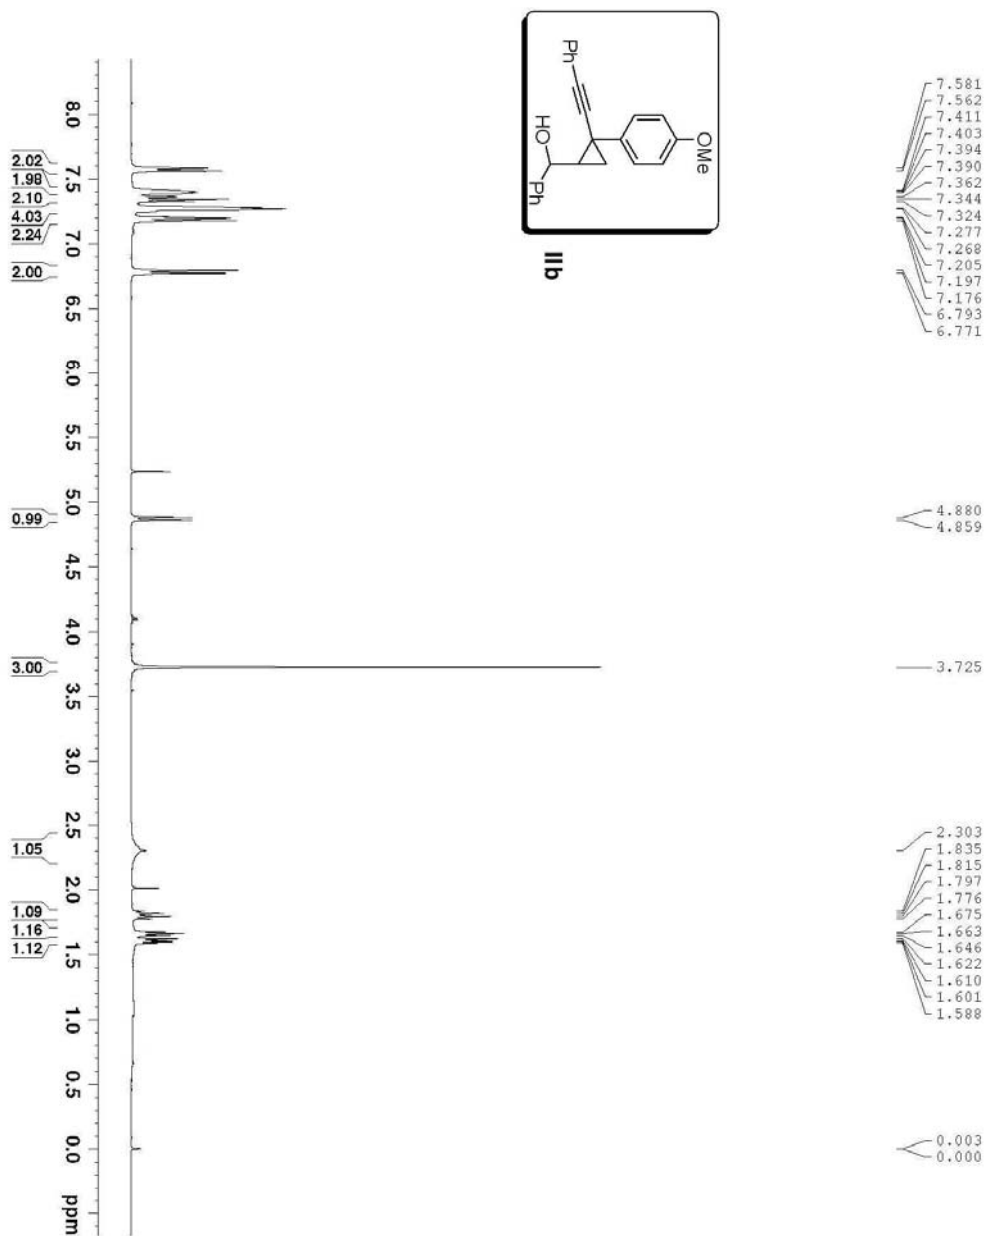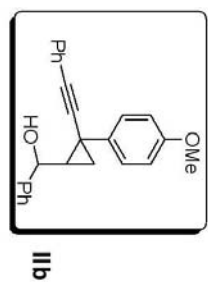

```

NAME          zsm-313
EXPNO         10
PROCNO        2008091
Date_         10.05
Time          10.05
INSTRUM       spect
PROBHD        5 mm PABBO BB-
PULPROG       zgpg30
TD            65536
SOLVENT       CDCl3
NS            16
DS            2
SFO1          0.222483 MHz
SFO2          0.222483 MHz
SFO3          0.222483 MHz
AQ            3.9844287 sec
RG            50.8
DW            60.800 usec
DE            8.50 usec
TE            29.2722
D1            1.00000000 sec
TDO           1
===== CHANNEL f1 =====
NUC1          13C
P1           14.70 usec
PL1          -1.00 dB
PL1W         13.75590801 W
SFO1         400.1324710 MHz
SI           32028
NUC2          1H
P2           0
PL2          0
SFO2         400.1300258 MHz
SI           32028
SSB          0
LB           0.30 Hz
GB           0
PC           1.00
    
```

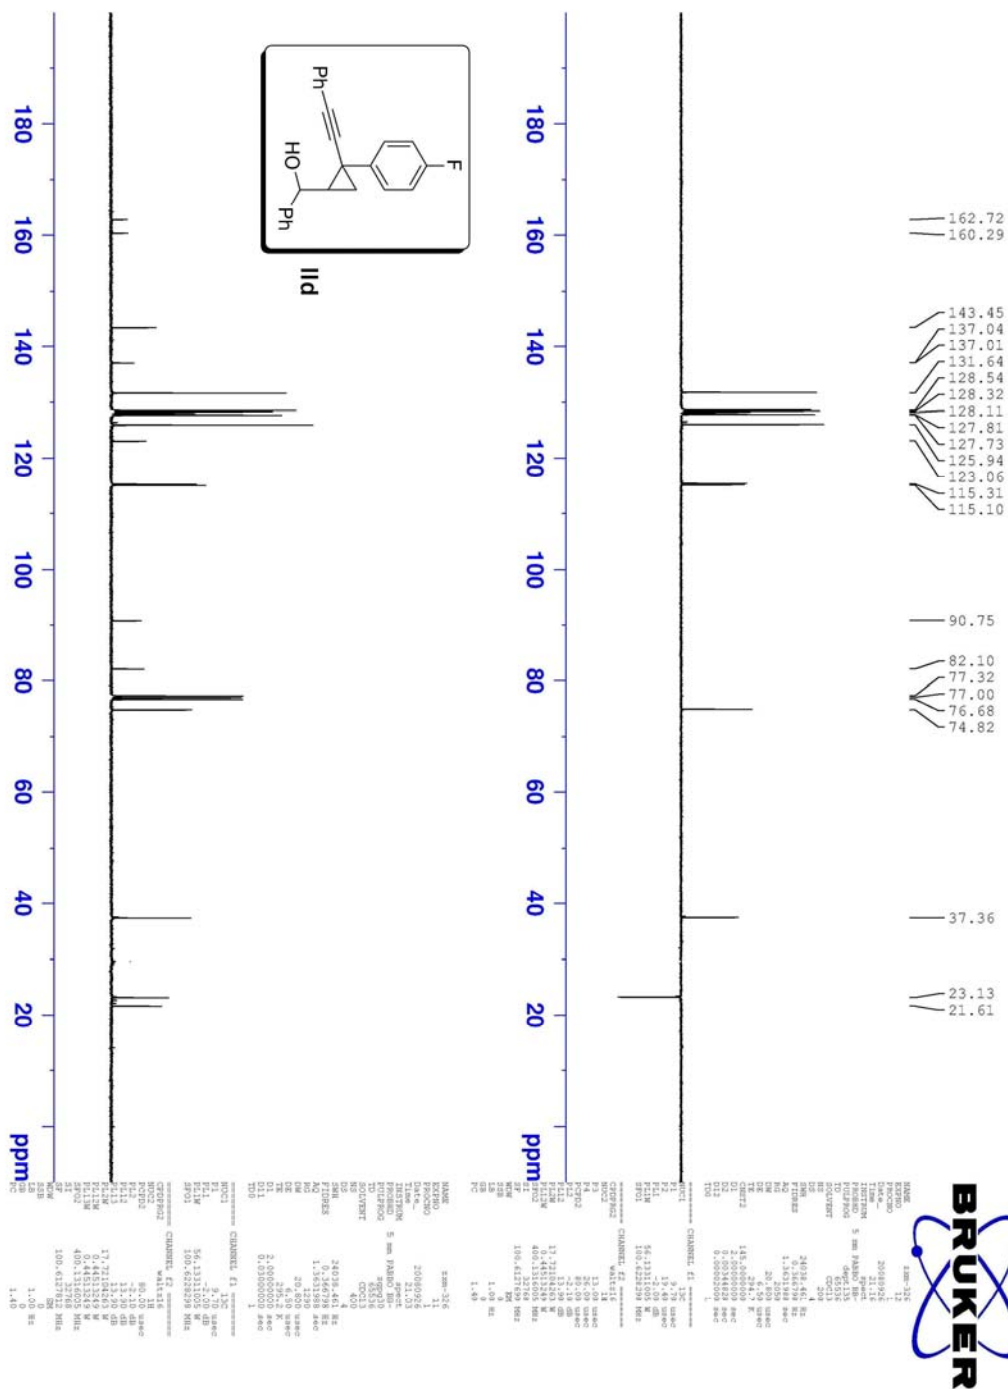

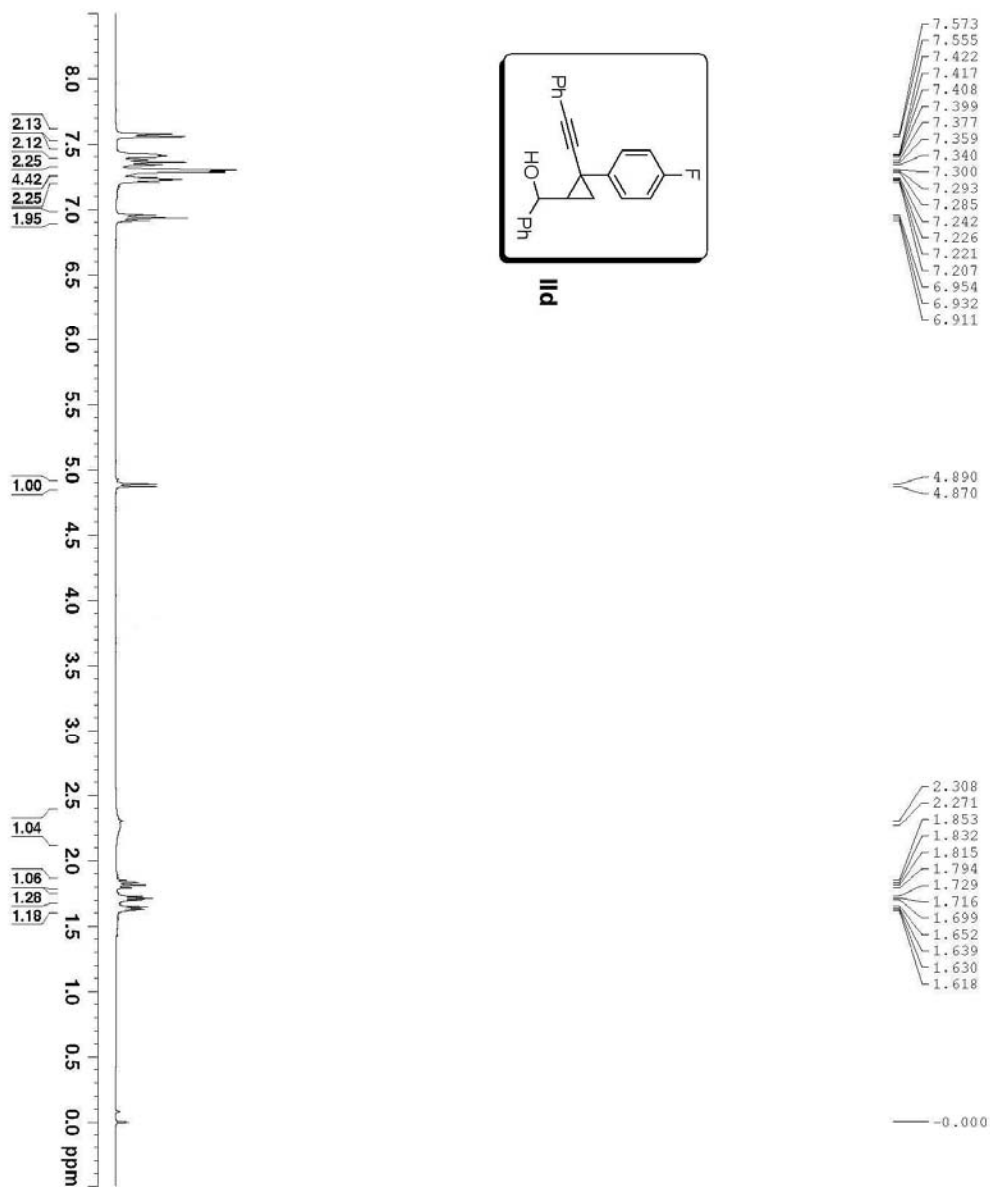

```

NAME          zsm-376
EXPNO         10
PROCNO        1
Date_         20060926
Time          20.3
INSTRUM       spect
PROBHD        5 mm PABO BB-
PULPROG       zg30
TD            65536
SFO          500.130445
AQ           0.29167
RG           16
DS           16
SWH          8223.685 Hz
FIDRES       0.122483 Hz
AQ           3.96
RG           718
DW           60.880 usec
DE           6.50 usec
TE           293.2 K
T1           1.00000000 sec
T10
===== CHANNEL f1 =====
NUC1          13C
P1           14.00 usec
PL1          -1.00 dB
PL12         13.75590801 W
SFO1         400.130445 MHz
SI           32768
SM          400.1300445 MHz
ZG          0
SSB          0
LB           0.30 Hz
GB           0
PC           1.00
    
```

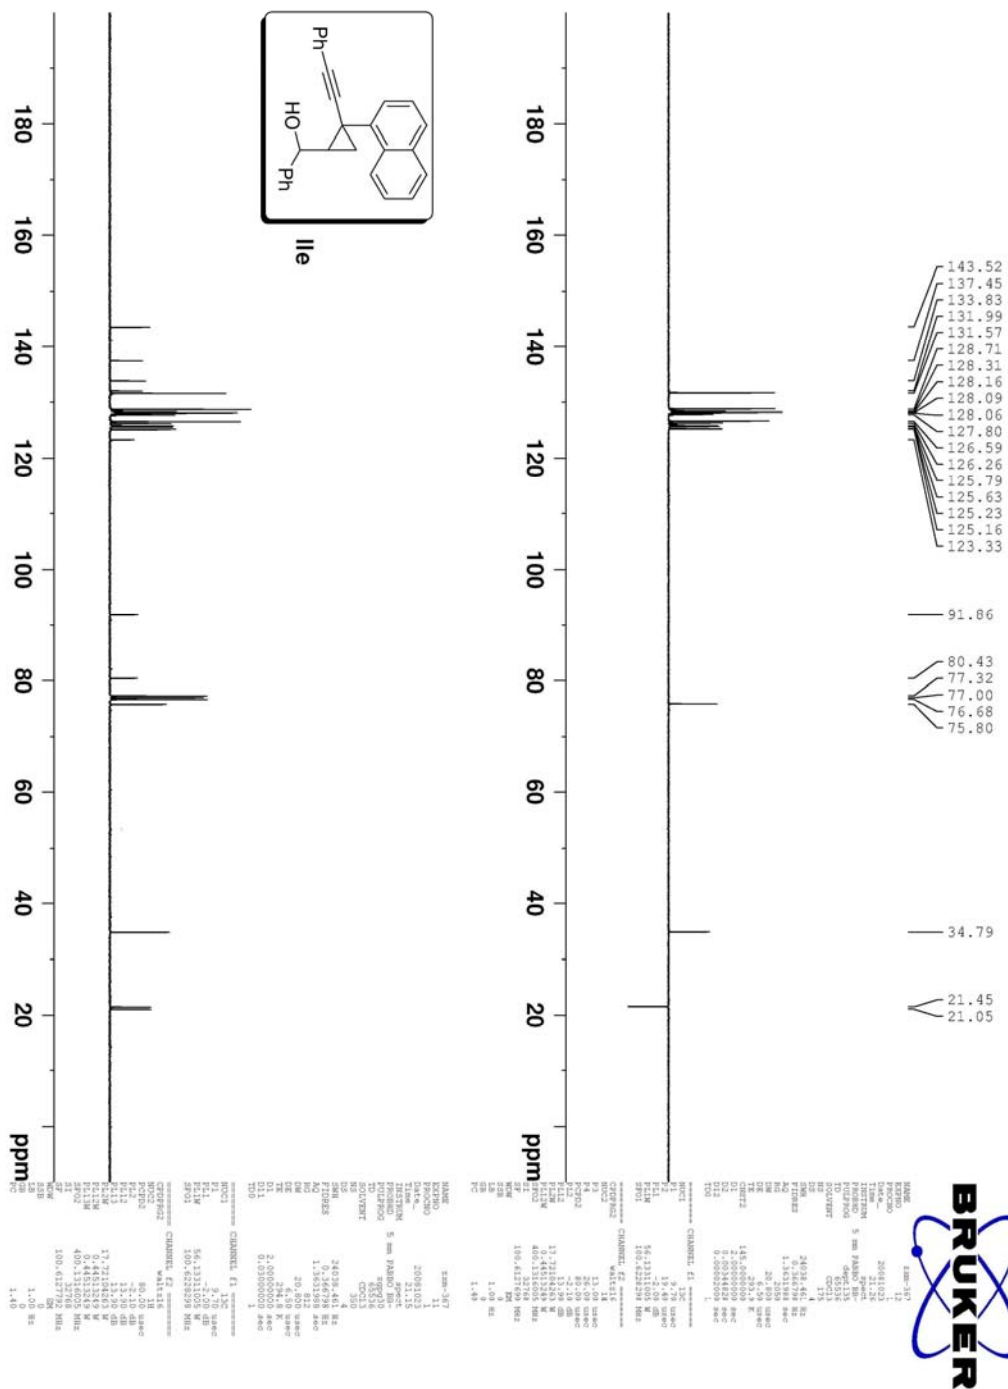



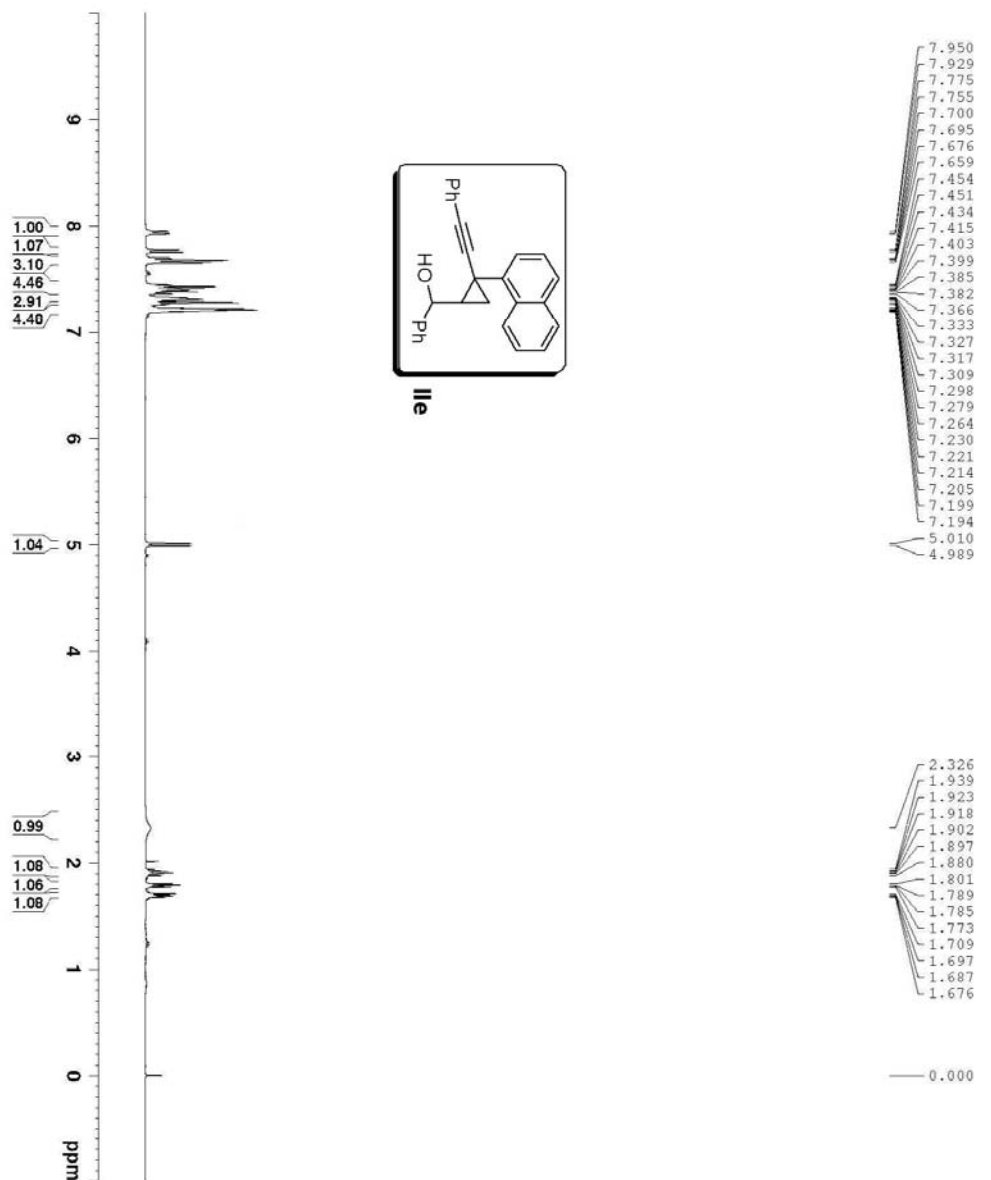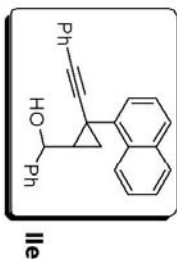

```

NAME                               Exm-367
EXPNO                               1
PROCNO                               1
Date_                               20081023
Time                               20.53
PROBHD                               5 mm PABBO
PULPROG                               zgpg30
TD                               65536
SOLVENT                               CDCl3
NS                               19
DS                               2
SWH                               8223.465 Hz
FIDRES                               0.125483 Hz
AQ                               3.9846387 sec
RG                               60.800 usec
DE                               6.50 usec
TE                               293.3 K
D1                               1.00000000 sec
D10                                1
===== CHANNEL f1 =====
NUC1                               1H
P1                               14.70 usec
PL1                               -1.00 dB
PL12                               13.7659250 dB
SFO1                               400.1324710 MHz
SI                               32768
SF                               400.1300312 MHz
WDW                               EM
SSB                               0
LB                               0.30 Hz
GB                               0
PC                               1.00
    
```



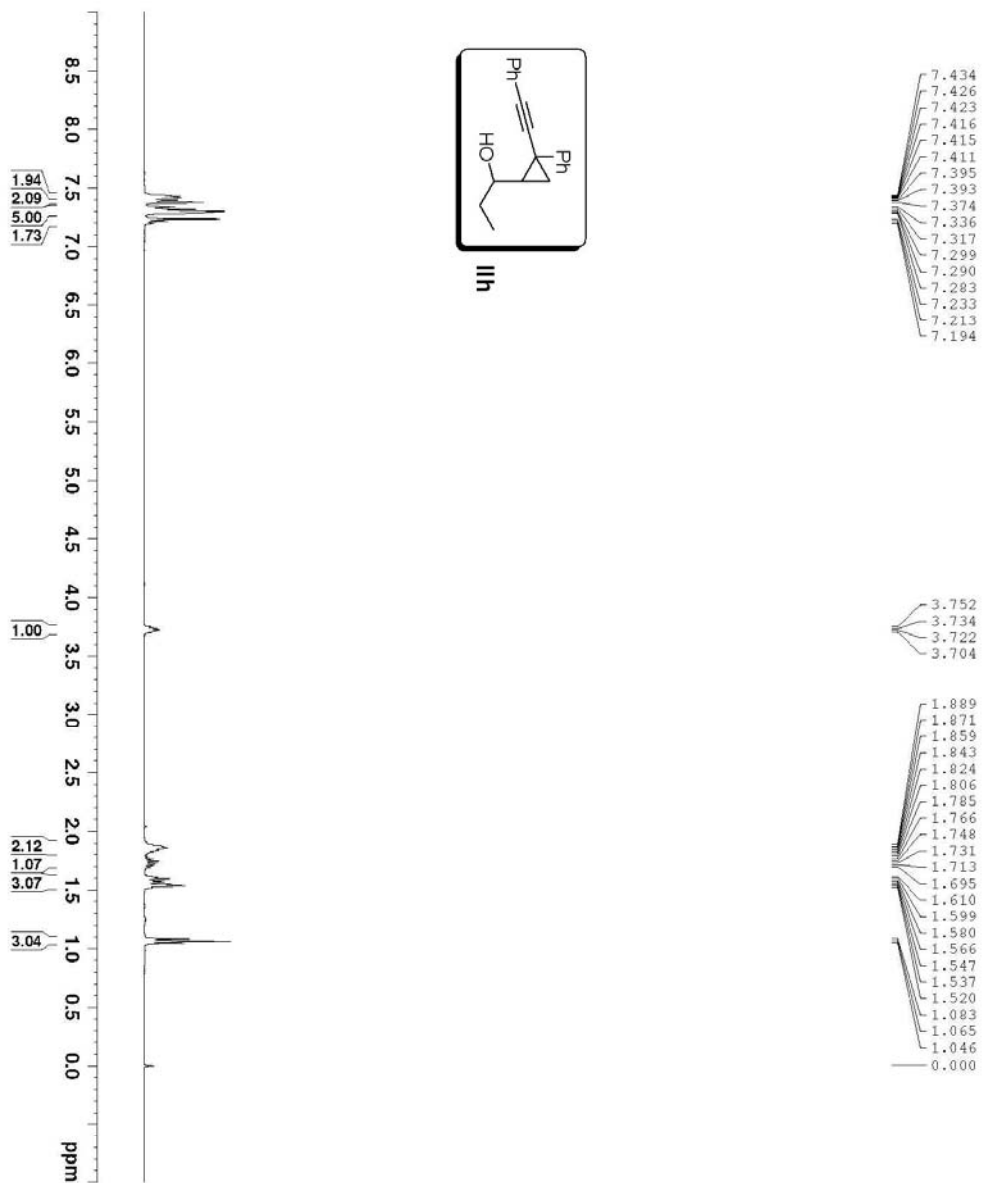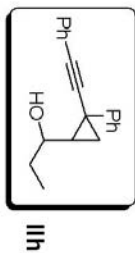

```

NAME          exm-751
EXPNO         10
PROCNO        1
Date_         20091103
Time          12.45
INSTRUM       spect
PROBHD        5 mm PABBO BB-
PULPROG       zg30
TD            65536
SFO           400.130161 MHz
AQ            0.122483 Hz
RG            3.9844987 sec
RO           0.122483 Hz
DE            60.800 usec
TE            292.8 K
D0            1.00000000 sec
===== CHANNEL f1 =====
NUC1          1H
P1            14.70 usec
PL1          -1.70 dB
PL1W         13.75590801 W
SFO1         400.1324710 MHz
SI            32768
SF           400.1300161 MHz
WDW           EM
SSB           0
LB            0.30 Hz
GB            0
EC            1.00
    
```

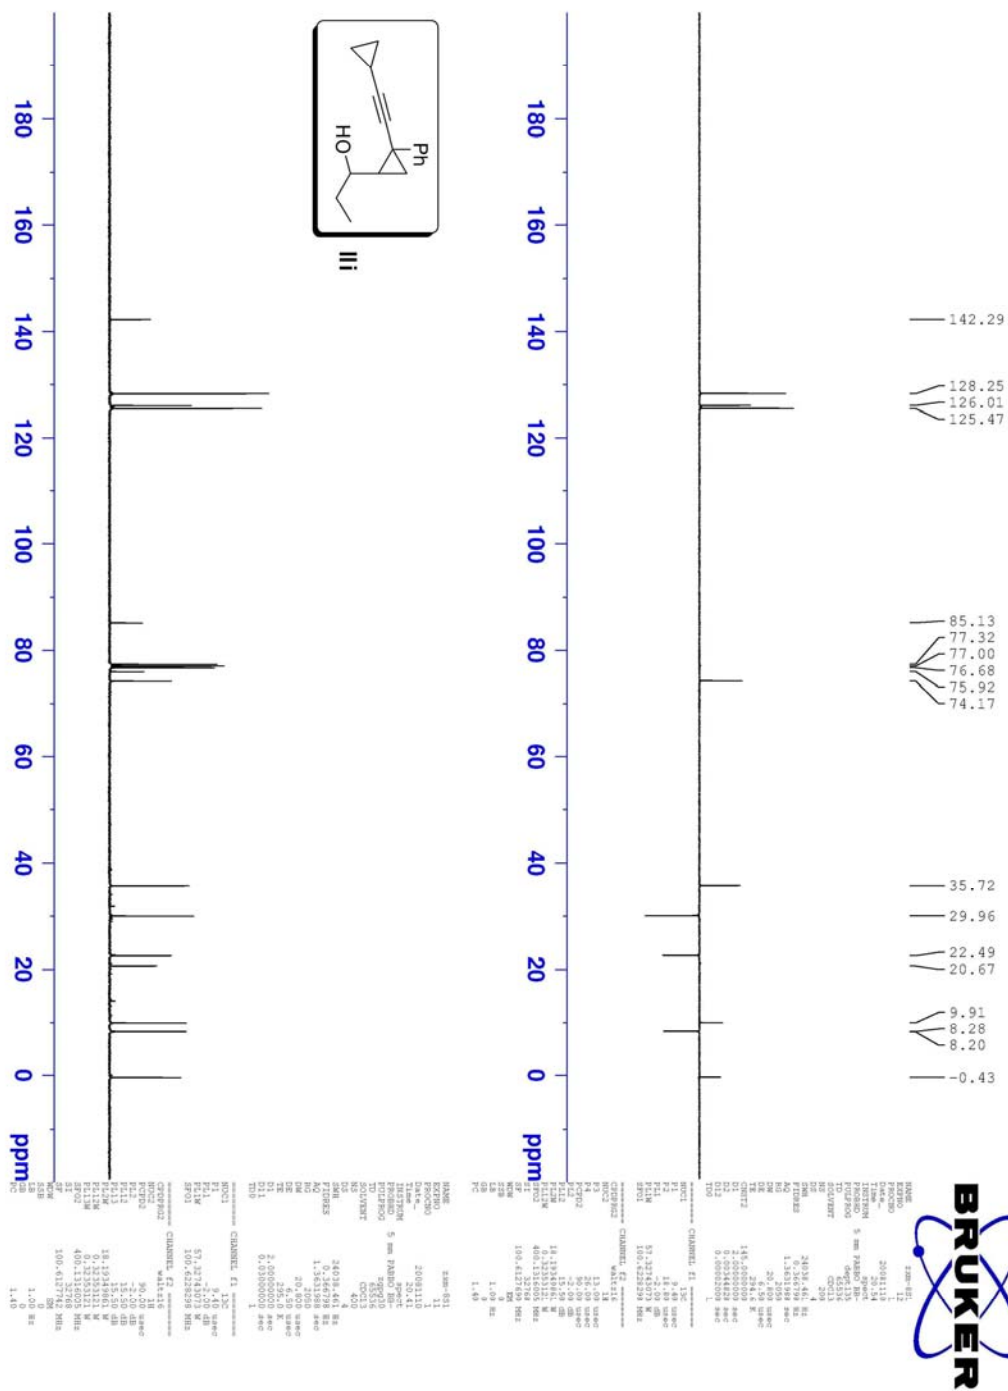

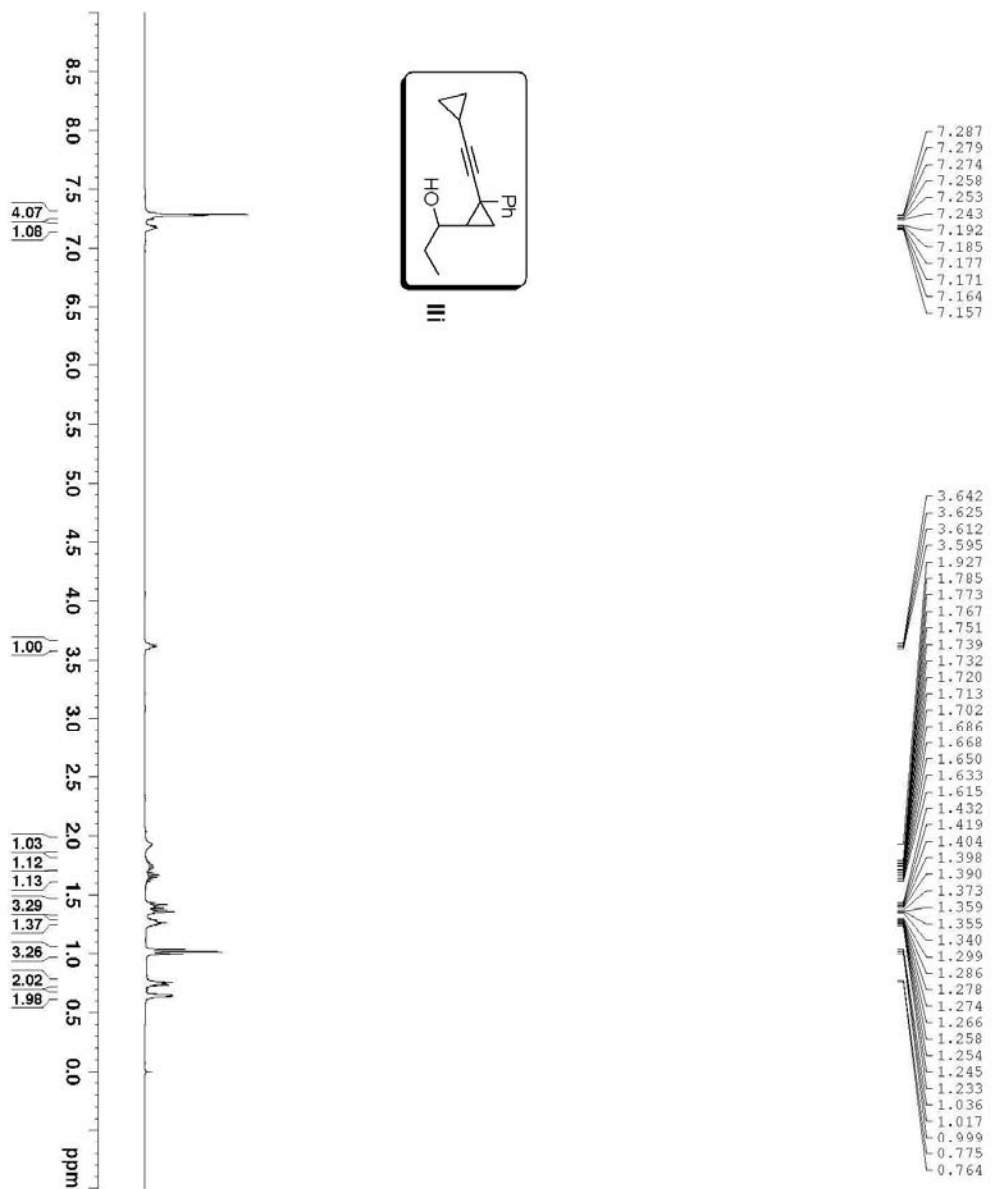

```

NAME          zxm-881
EXPNO         10
PROCNO        2008110
Date_         20.17
Time          20.17
INSTRUM       spect
PROBHD        5 mm PABBO BH-
PULPROG       zgpg30
SOLVENT       CDCl3
NS            16
DS            2
SWH           9223.608 Hz
F2           0.712483 MHz
AQ            3.9842397 sec
RG            71.8
DW            60.800 usec
DE            9.30 usec
TE            300.2 K
D1            1.00000000 sec
TDC           1

===== CHANNEL f1 =====
NUC1          13C
P1            14.50 usec
PL1           0.00 dB
PL1W          11.47922053 W
SFO1          400.1324710 MHz
SI            32
WDW           EM
SSB           0
LB            0
GB            0
PC            1.00
    
```

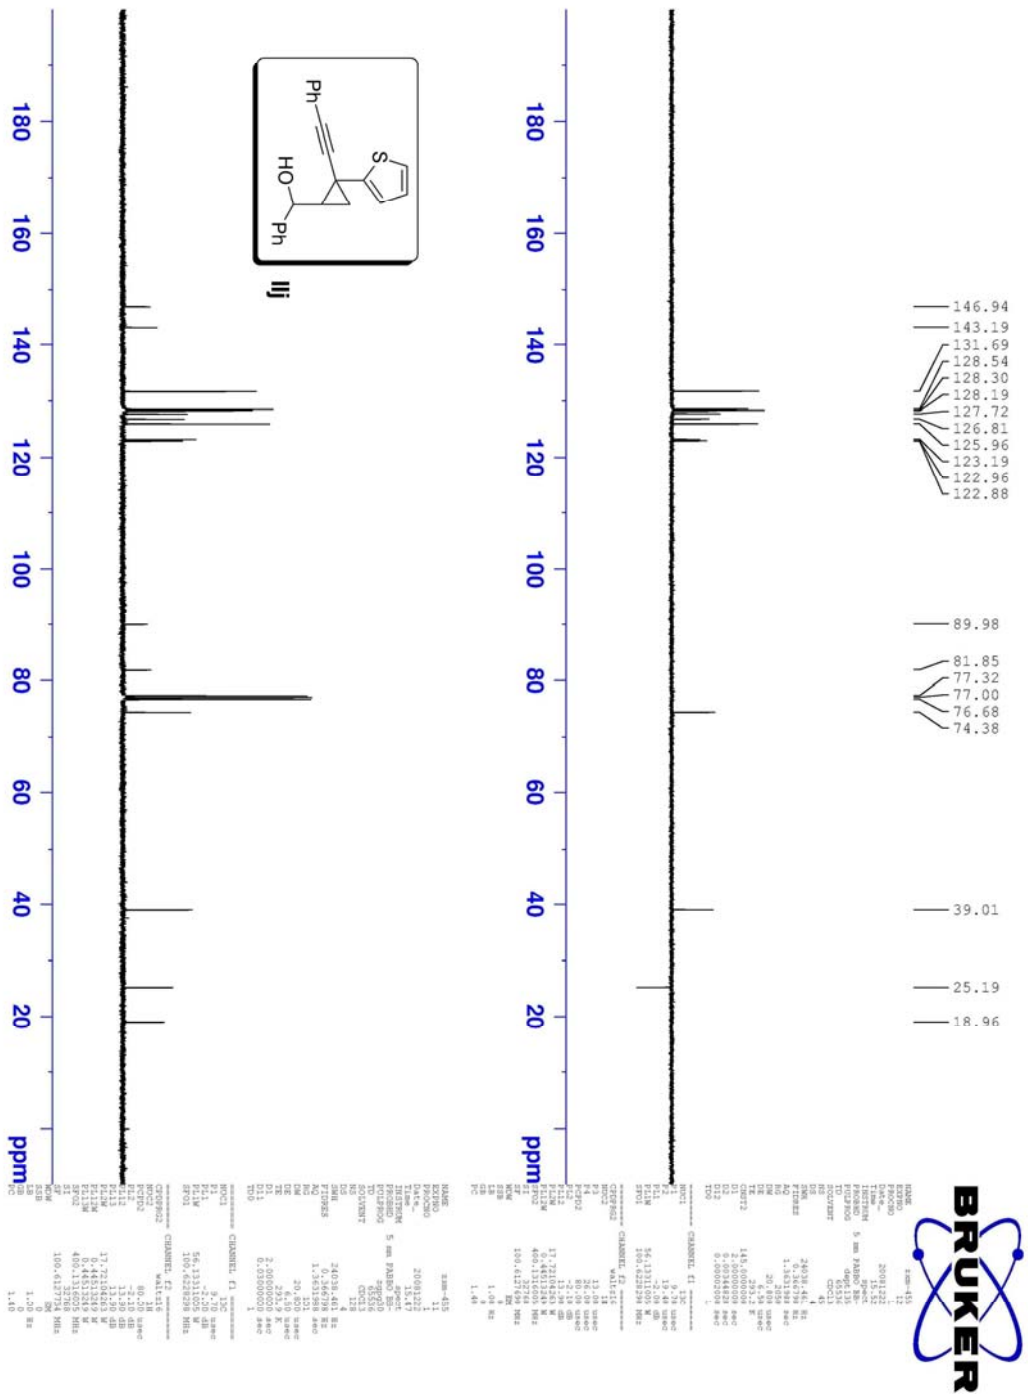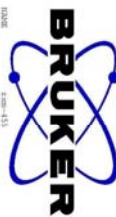

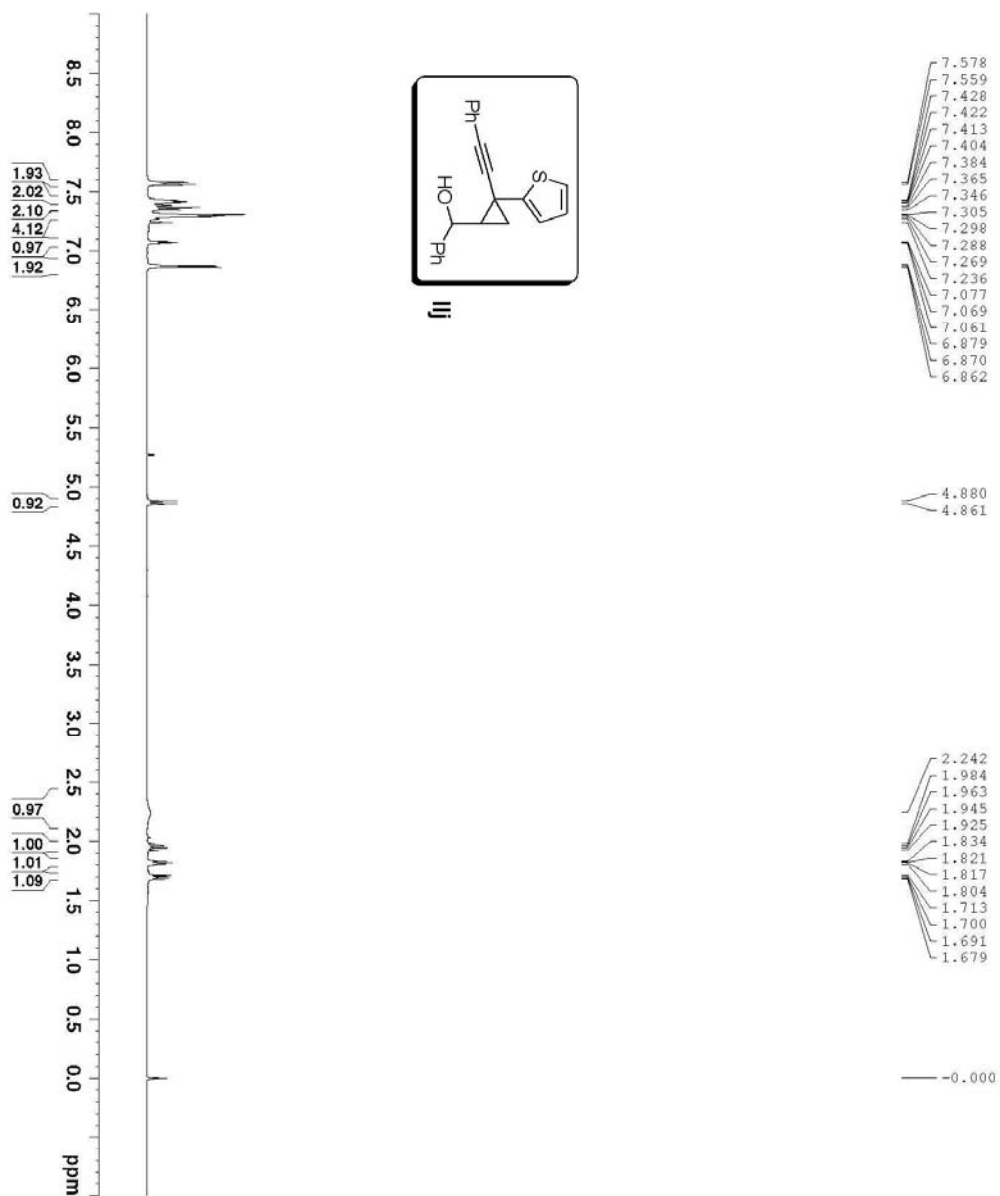

```

NAME          zxm-455
EXPNO         1
PROCNO        1
Date_         20081222
Time          15.39
INSTRUM       5 mm PABBO
PROBHD        zgpg30
PULPROG       zgpg30
TD             65536
SOLVENT       CDCl3
NS            8
DS            8
SWH           8223.685 Hz
FIDRES        0.125483 Hz
AQ            3.984587 sec
RG            60.800 usec
DM            101
DE            4.50 usec
TE            292.4 K
D1            1.00000000 sec
TD0           1

===== CHANNEL f1 =====
NUC1          1H
P1            14.70 usec
PL1          -1.00 dB
PL1W         13.75590801 W
SFO1         400.132768 MHz
SF           400.1300146 MHz
WDW          EM
SSB          0
DS           0.30 Hz
GB           0
PC           1.00
    
```

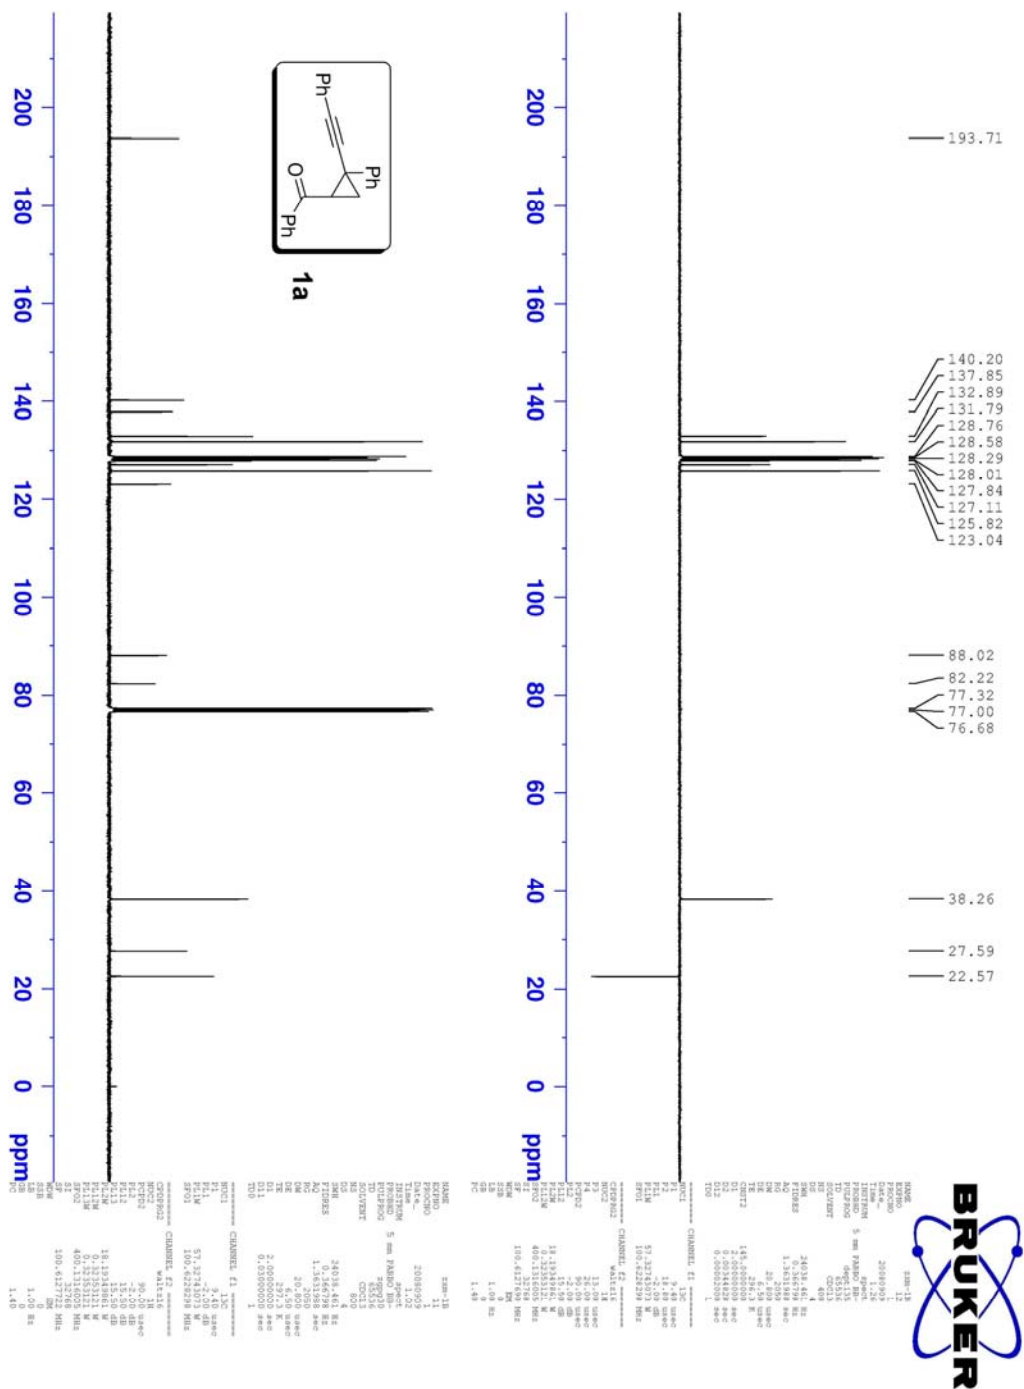



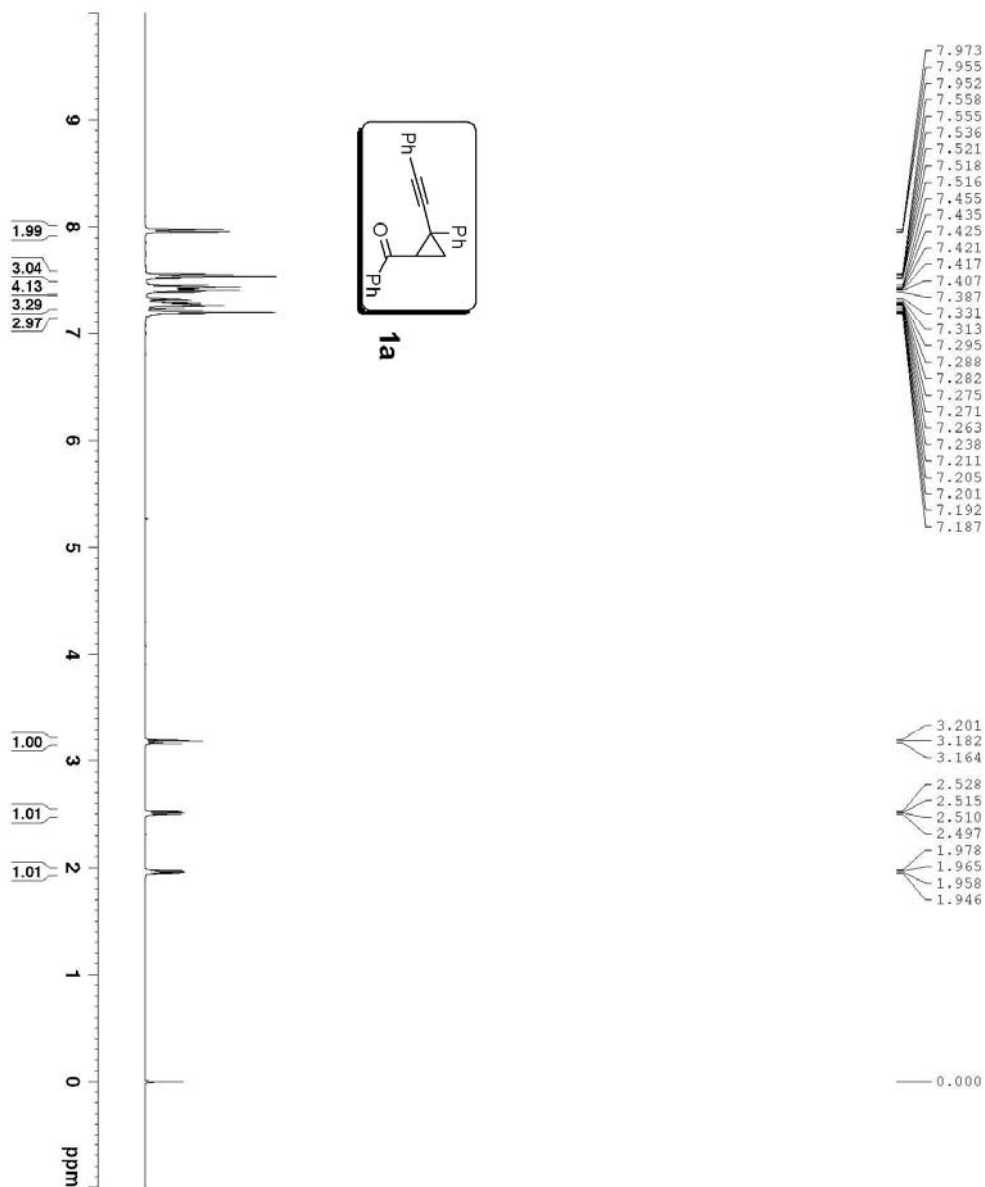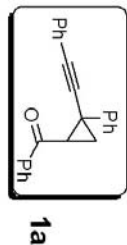

```

NAME                zxm-1B
EXPNO                10
PROCNO               1
F2 -> F1             20080901
Time--              0.15
INSTRUM              spect
PROBHD               5 mm PABBO BB-
PULPROG              zgpg30
TD                   65536
SOLVENT              CDCl3
NS                   16
DS                   2
SWH                  0223.685 MHz
NUC1                  13C
NUC2                  13C
FIDRES               0.7224814 Hz
AQ                   3.9844287 sec
RG                   144
DW                   60.800 usec
DE                   6.50 usec
TE                   29.300000 K
D1                   1.00000000 sec
TD0                  1

===== CHANNEL f1 =====
NUC1                 13C
P1                   14.60 usec
PL1                  0.00 dB
PL1W                 11.47923053 W
SFO1                 400.1324710 MHz
SI                   327138
SF                    400.1300118 MHz
WDW                   EM
SSB                   0
LB                   0.30 Hz
GB                   0
PC                   1.00
    
```

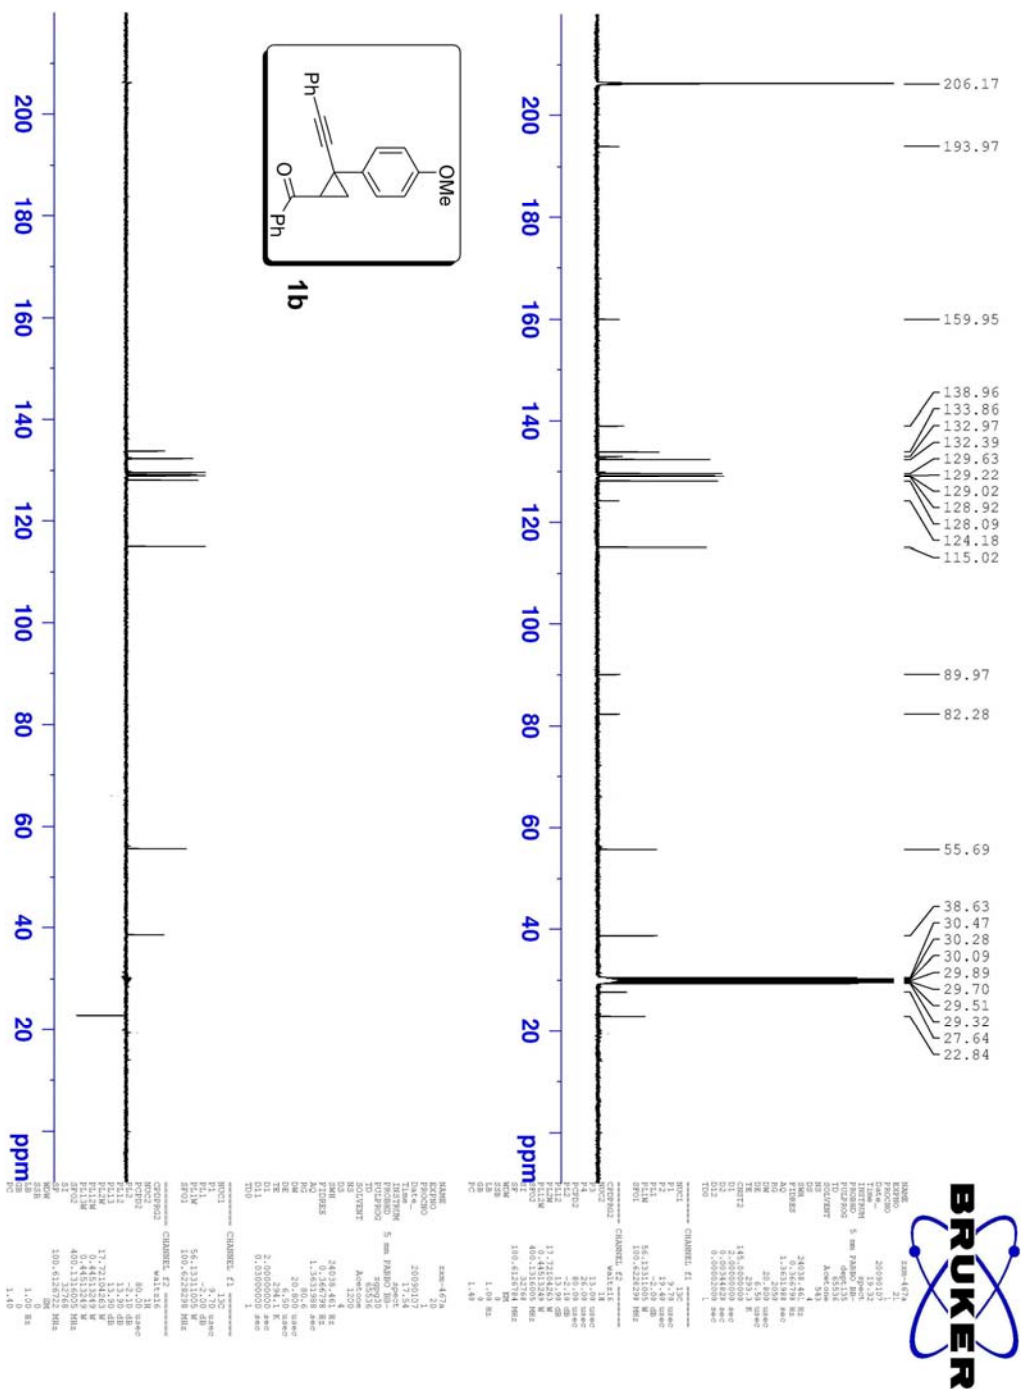

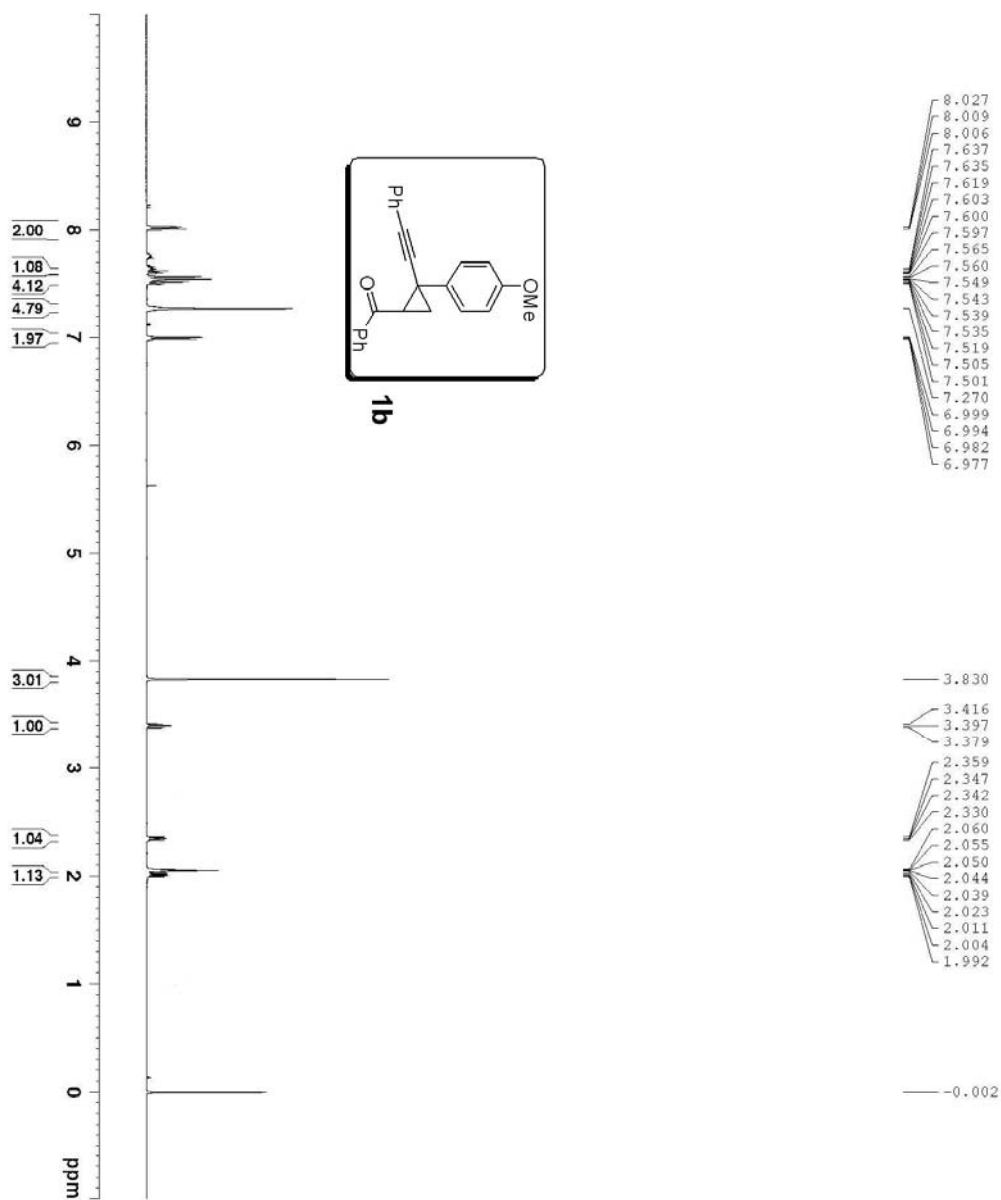

```

NAME          Zsm-467a
EXPNO        10
PROCNO       1
Date_        20090107
Time         15.22
F2 - F1      12.500
PROBHD       5 mm PABBO
PULPROG      zgpg30
TD           65536
SOLVENT      Acetone
NS           27
DS           2
SWH           8273.685 Hz
FIDRES       0.125483 Hz
AQ           3.9846387 sec
RG           144
RN           144
DS           69.8450 usec
TE           293.2 K
D1           1.000000000 sec
TD0          1

===== CHANNEL f1 =====
NUC1          1H
P1           14.70 usec
PL1          -1.00 dB
ELI1         13.76580801 W
SFO1         400.1390051 MHz
SI           32768
SF           400.1390051 MHz
WDW          EM
SSB          0
GB           0
PC           0.30 Hz
GC           1.00
  
```

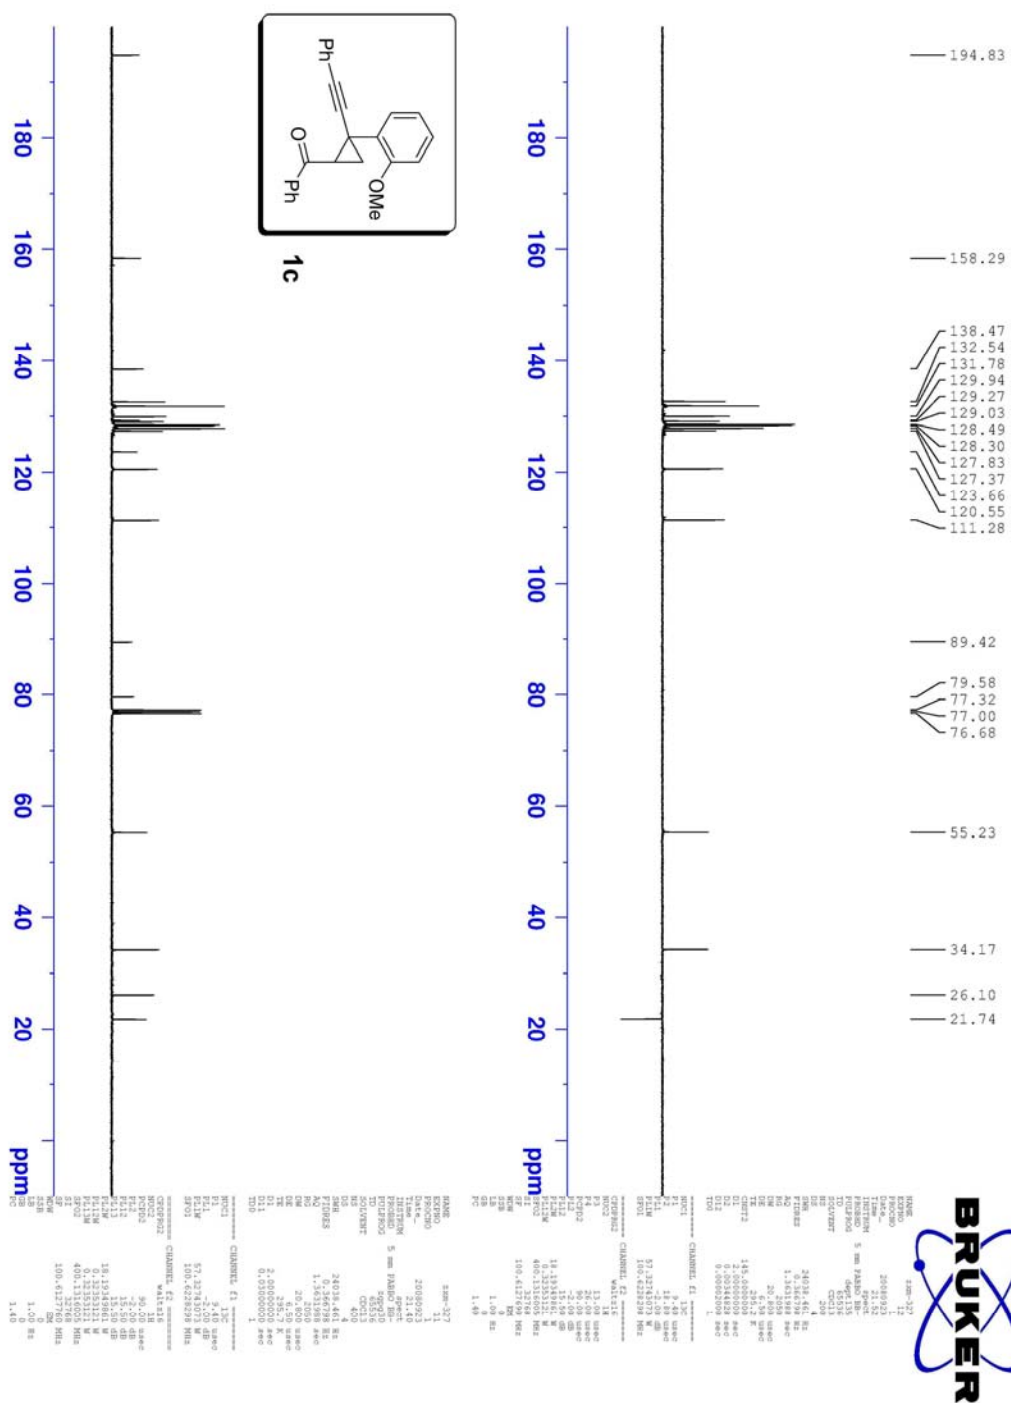

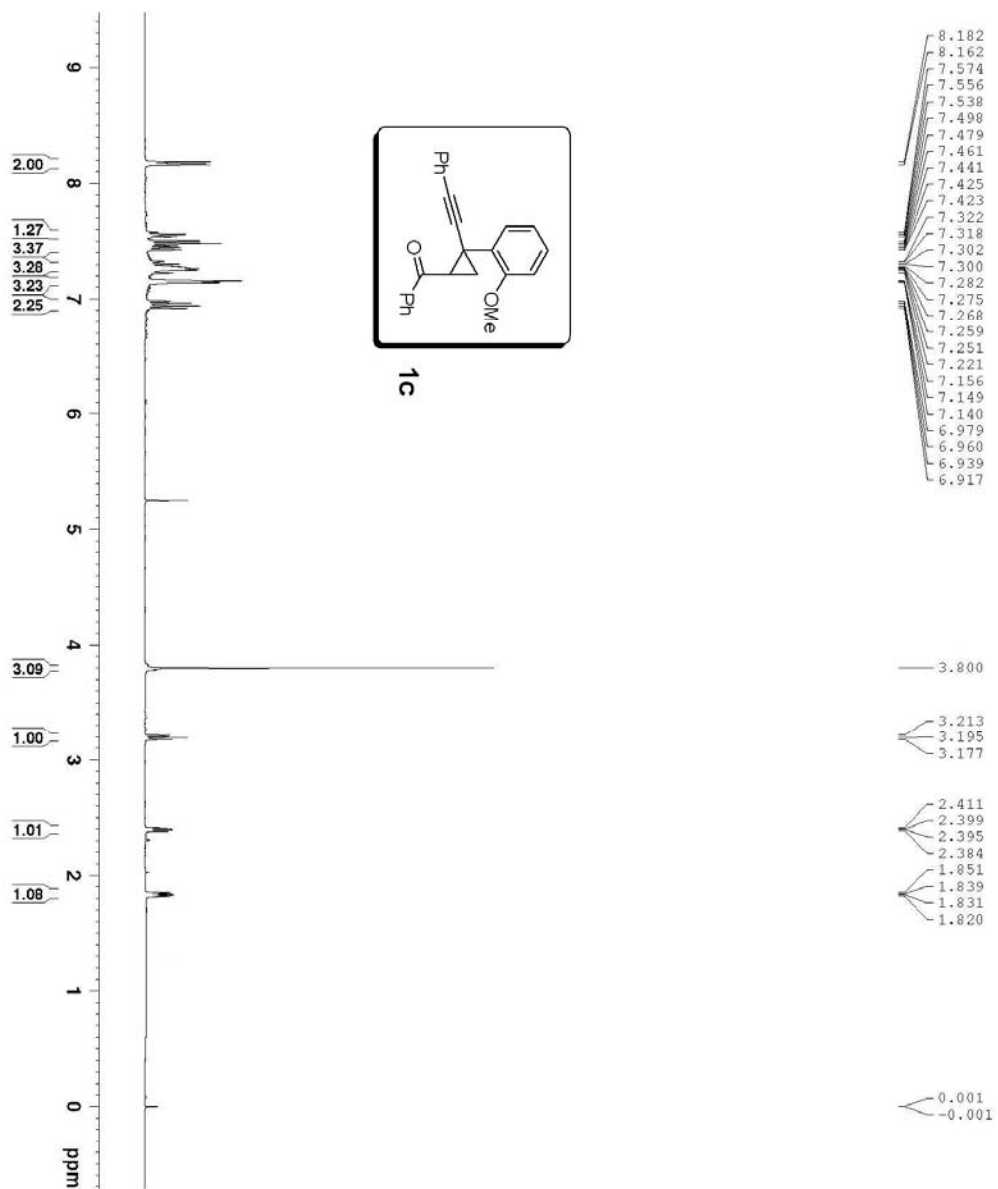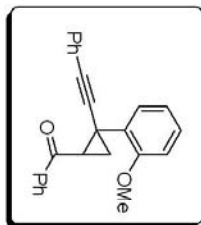

```

NAME                zsm-327
EXPNO                10
PROCNO               1
Date_                20090923
Time                 21:12
INSTRUM              spect
PROBHD                5 mm PABBO BB-
PULPROG              zgpg30
TD                    65536
SFOVENT              GMV 16
DS                    2
SWH                   8223.685 Hz
AQ                    0.122483 Hz
RG                    3.984
AQ                   80.6 sec
DW                    60.800 usec
DE                    5.50 usec
TE                    294.8 K
T1                    1.00000000 sec
T2
T3
T4
===== CHANNEL f1 =====
NUC1                  1H
P1                    14.00 usec
PL1                   0.00 dB
PL12                  11.4792053 W
SFO1                  400.1324710 MHz
SI                    32768
SF                     400.1300201 MHz
WDW                    EM
SSB                    0
LB                    0.30 Hz
GB                    0
PC                    1.00
    
```

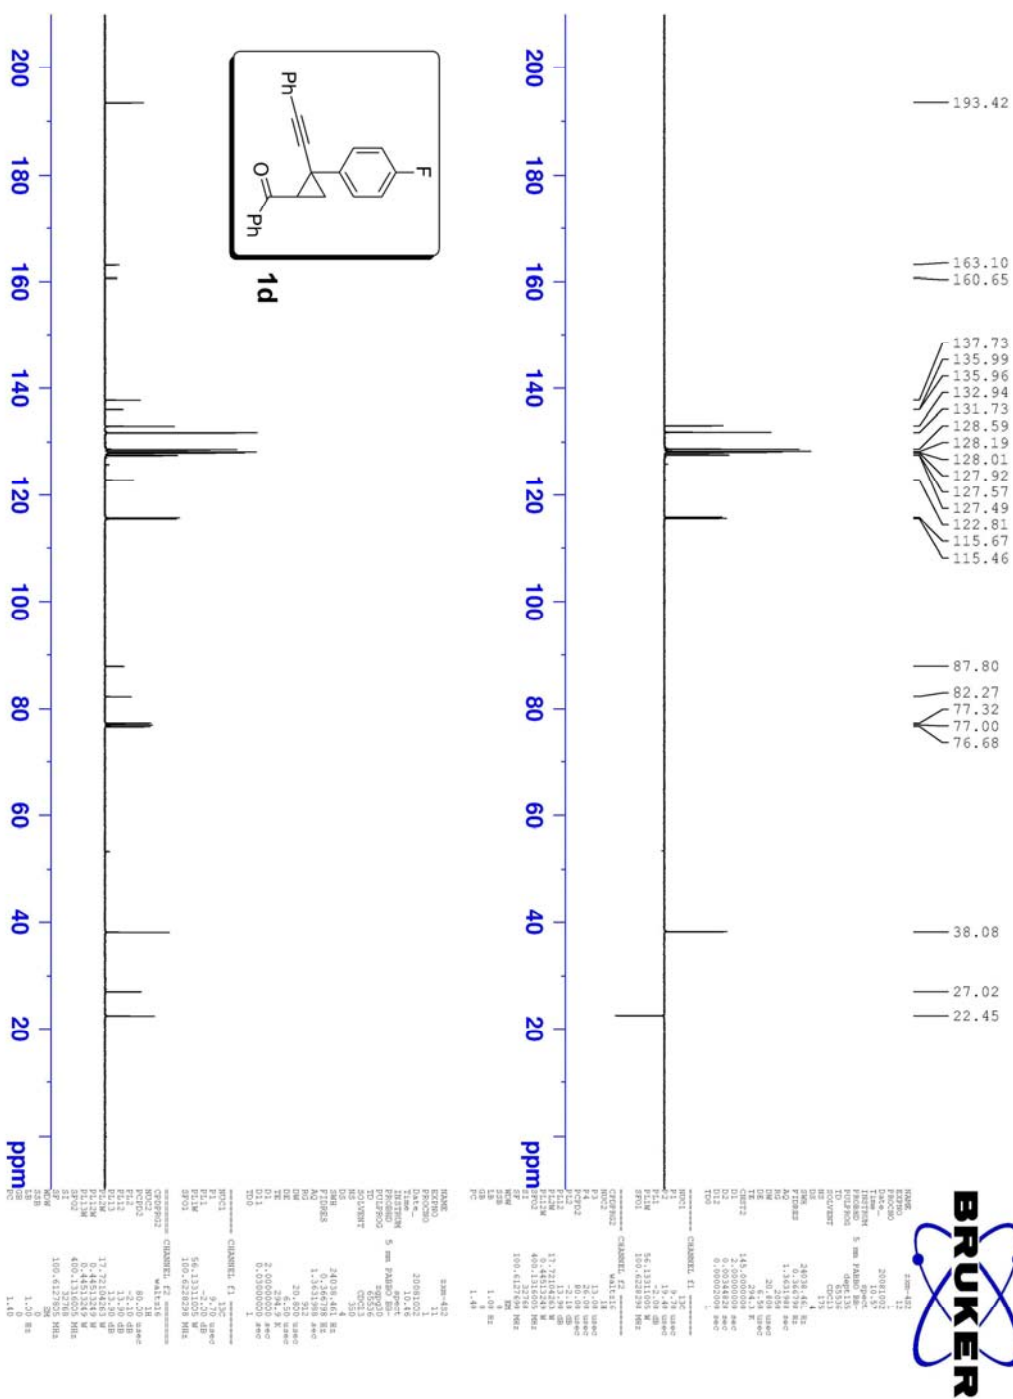

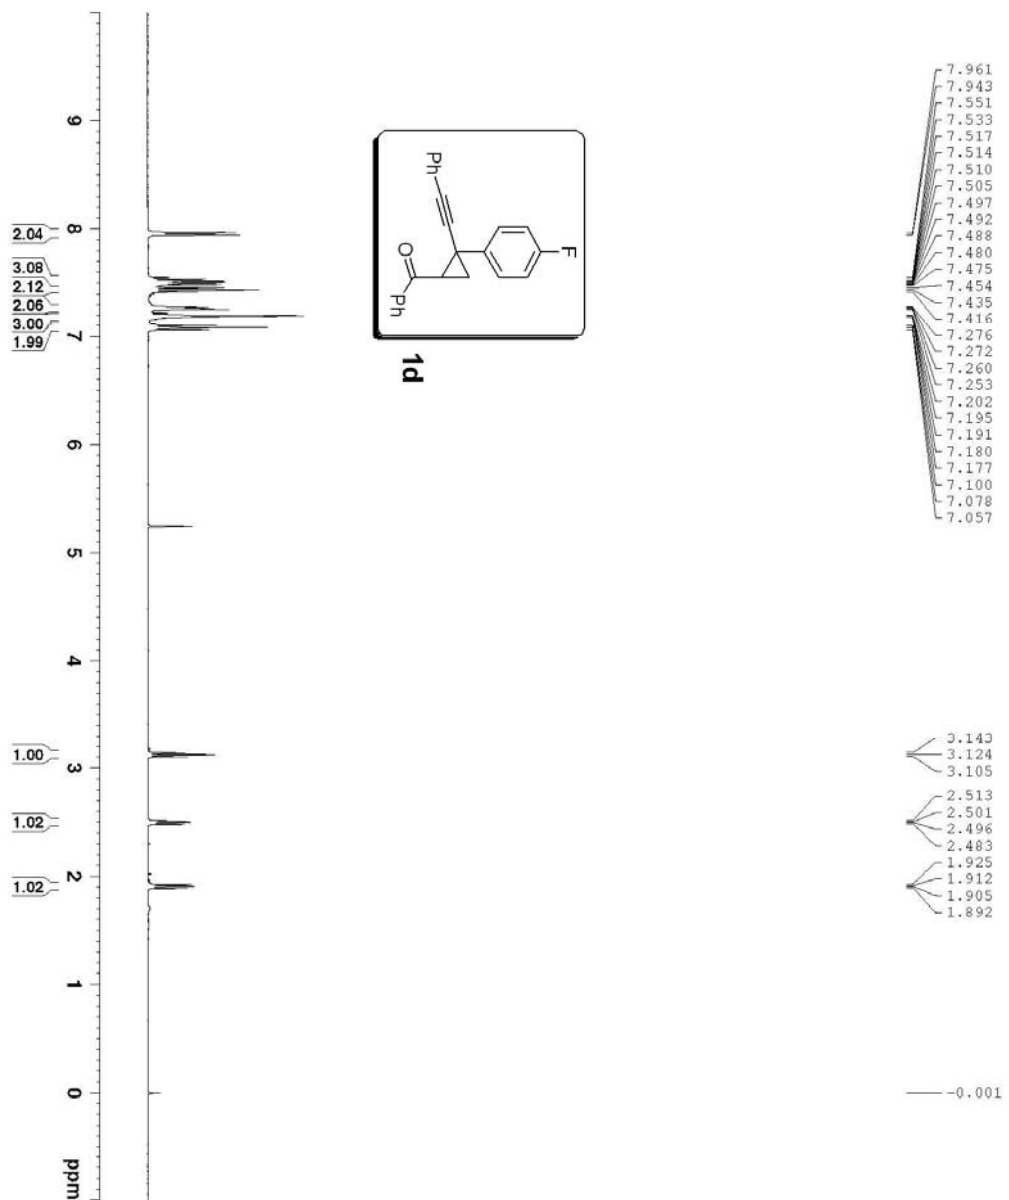

```

NAME                zcm-452
EXPERNO             10
PROCNO              20081002
Date_              2008
INSTRUM             spect
PROBHD              5 mm PABBO BB-
PULPROG             zg30
TD                  65535
AQ                   1.2
RG                   128
SOLVENT             CDCl3
NS                   2
DS                   1
SWH                  8223.685 Hz
FIDRES              0.1254883 Hz
AQ                   3.9846397 sec
DE                   60.800 usec
TE                   293.5 K
D1                   1.00000000 sec
D10                  1
===== CHANNEL f1 =====
NUC1                 1H
P1                   14.70 usec
PL1                  1.00 dB
PR1                  13.7458000
SFO1                 400.1324710 MHz
SI                   32768
SP                   400.1300273 MHz
MGM                  EM
SSB                  0.30 Hz
LGB                  0
PC                   1.00
    
```

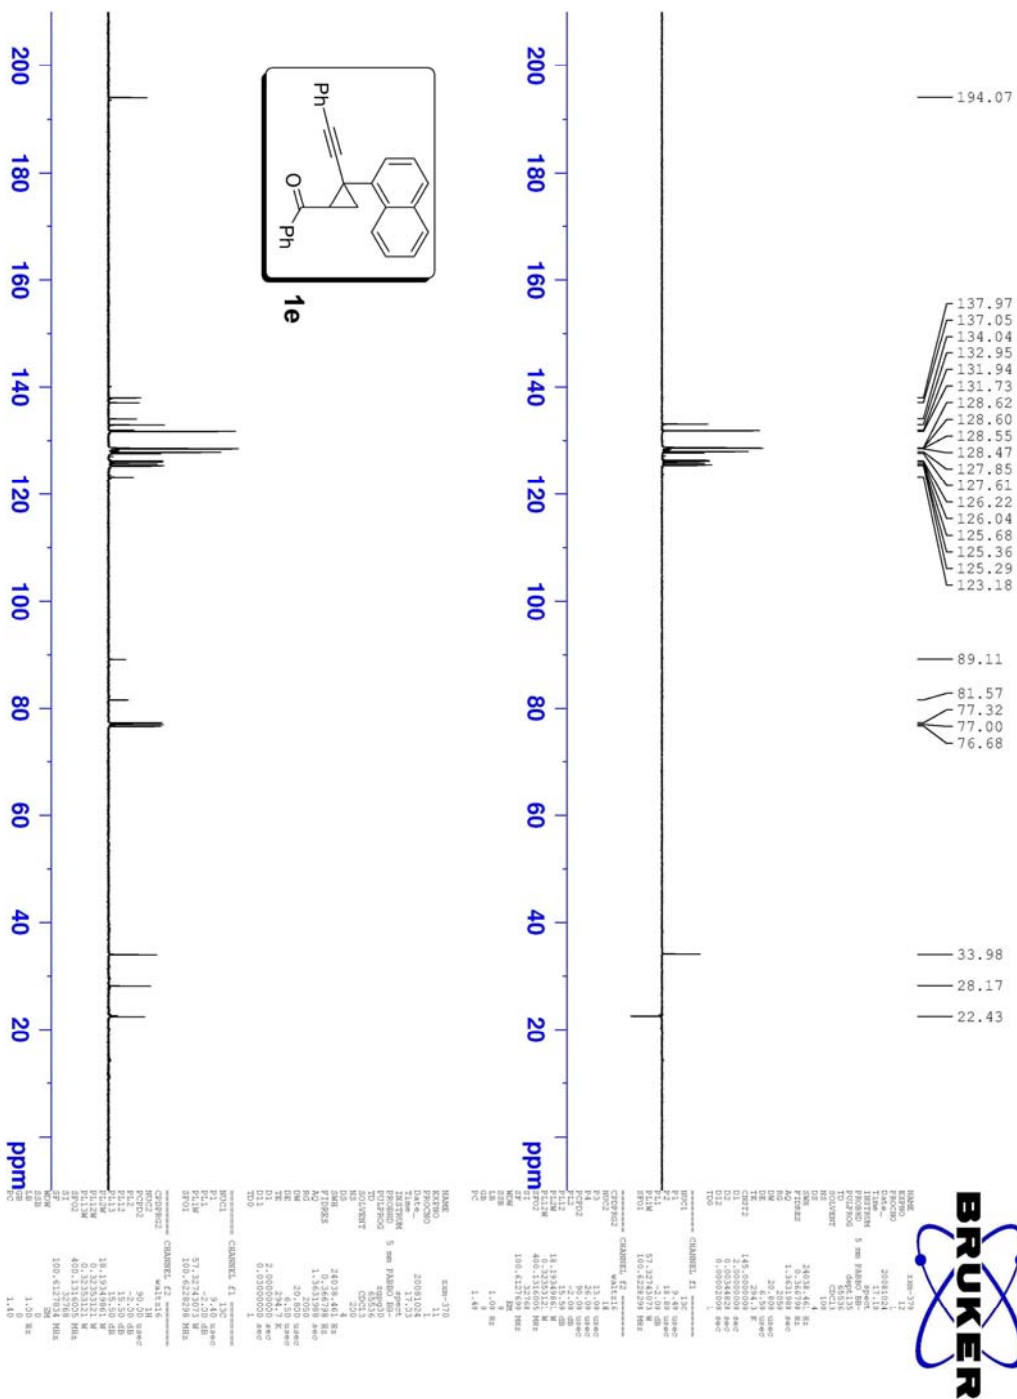



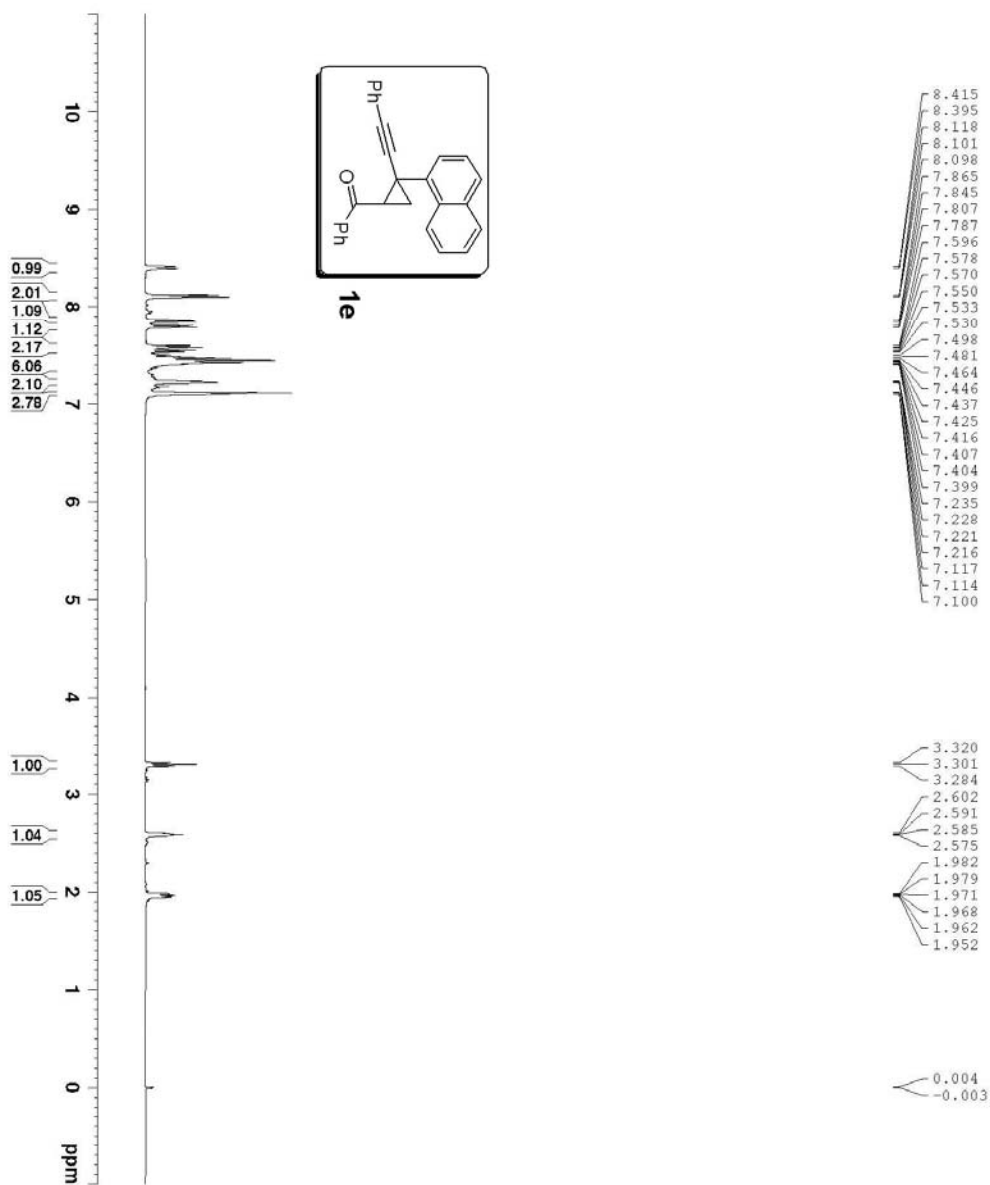

```

NAME          zsm-370
EXPNO         10
PROCNO        1
Date_         20081024
Time          11.11
INSTRUM       spect
PROBHD        5 mm PABBO BB-
PULPROG       zg30
TD            65536
SFO1          400.132710 MHz
AQ            0.0043
RG            3.984027
DE            6.50 usec
TE            294.3 K
TD0           1.00000001 usec

===== CHANNEL f1 =====
NUC1          1H
P1            14.10 usec
PL1          0.00 dB
PL1W         11.47932053 W
SFO1         400.132710 MHz
SI           32768
SOLVENT       DMS
SSB           0
LB            0.30 Hz
GB            0
PC            1.00
    
```

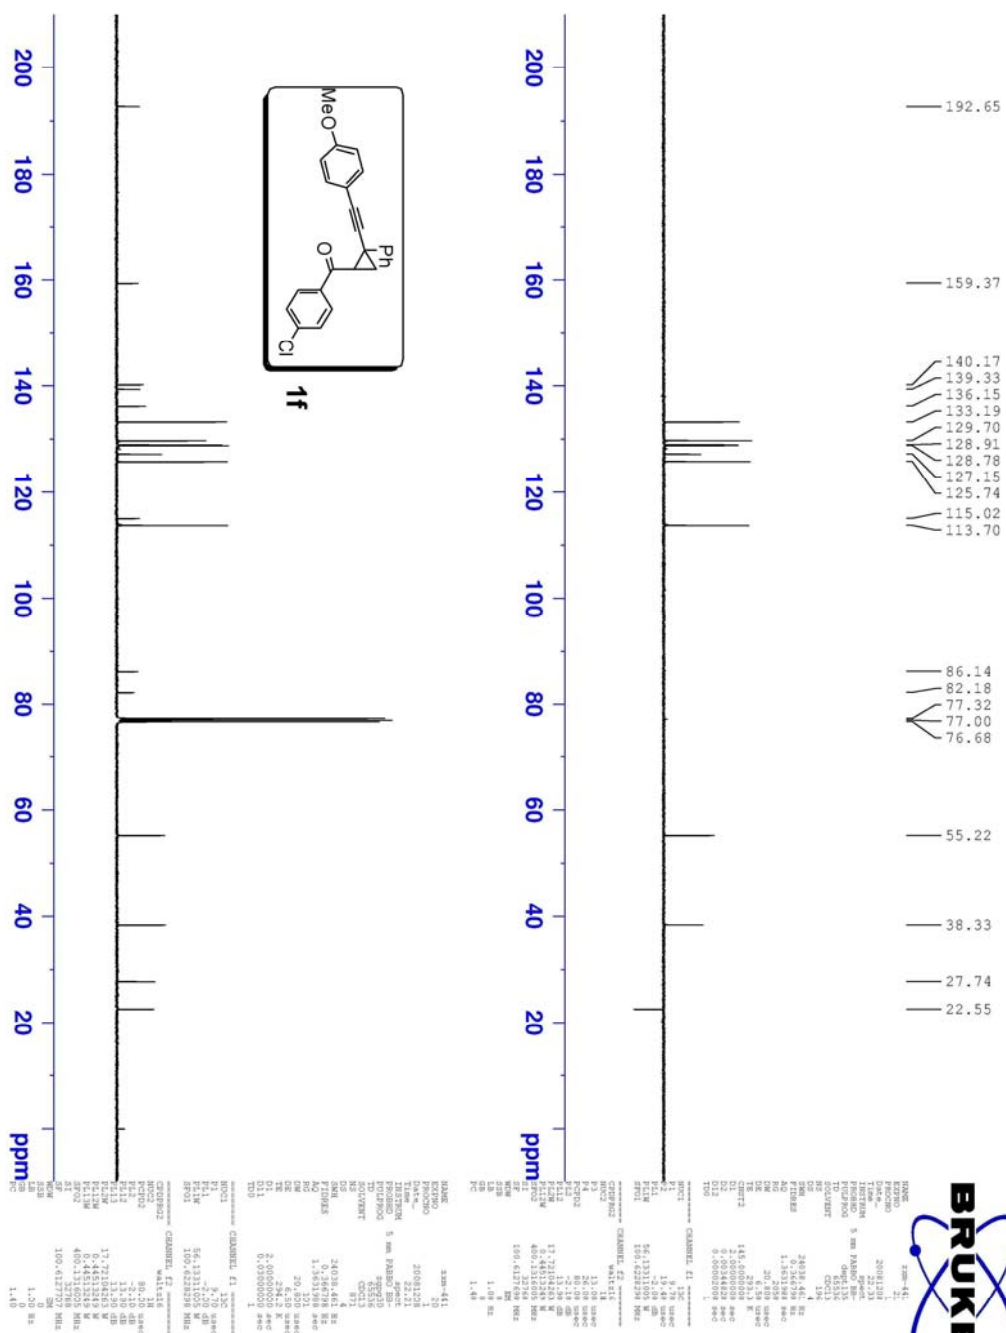

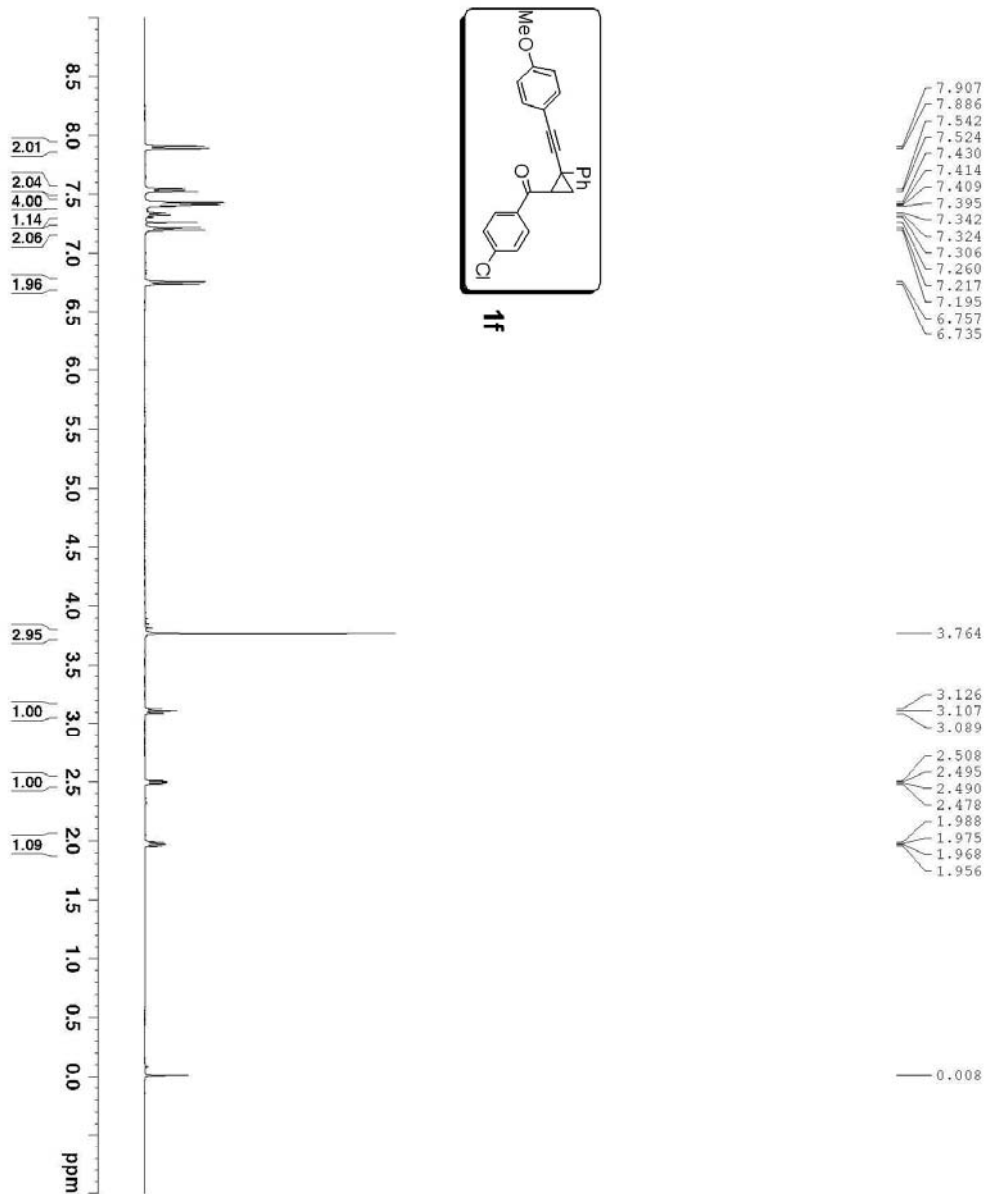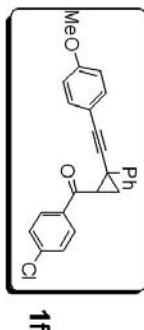

```

NAME zsm-441
EXPNO 10
PROCNO 20081203
INSTRUM spect
PROBHD 5 mm PABBO BB-
PULPROG zgpg30
SOLVENT CDCl3
NS 32
DS 2
SM 0.223, 0.483 Hz
AQ 0.1212483 sec
RG 3.9844287 sec
RG 144
DW 60.800 usec
DE 8.50 usec
TE 300.2 K
D1 1.00000000 sec
TD0 1

===== CHANNEL f1 =====
NUC1 14.70 usec
P1 1.00 dB
PL1 13.75590801 W
SFO1 400.1324710 MHz
SI 32068
SF 400.130068 MHz
NTW 0
SSB 0
LB 0.30 Hz
GB 0
PC 1.00
    
```

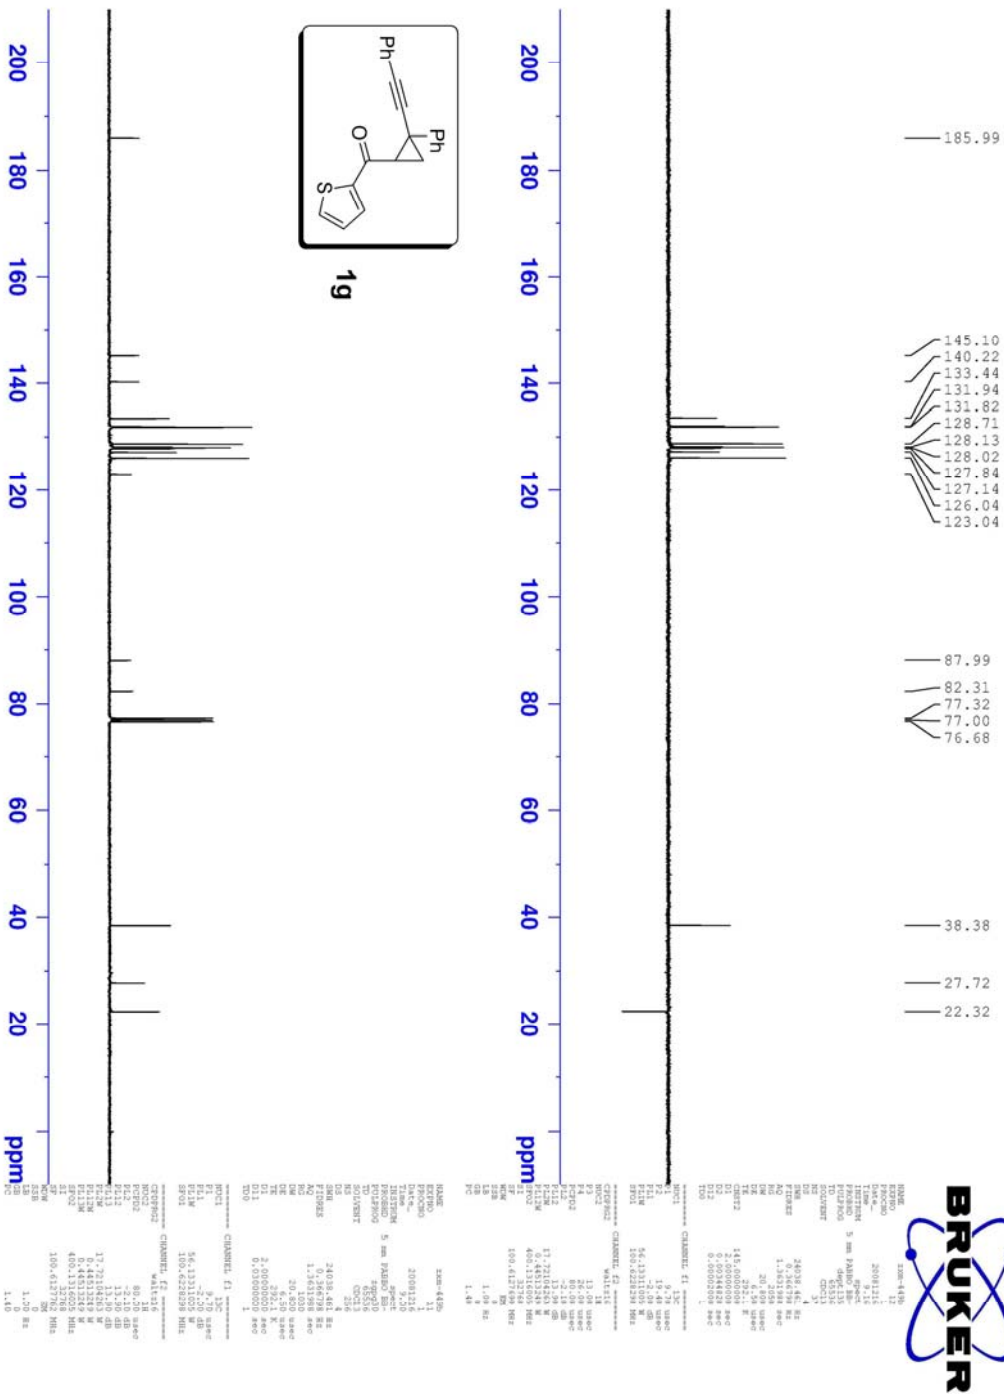

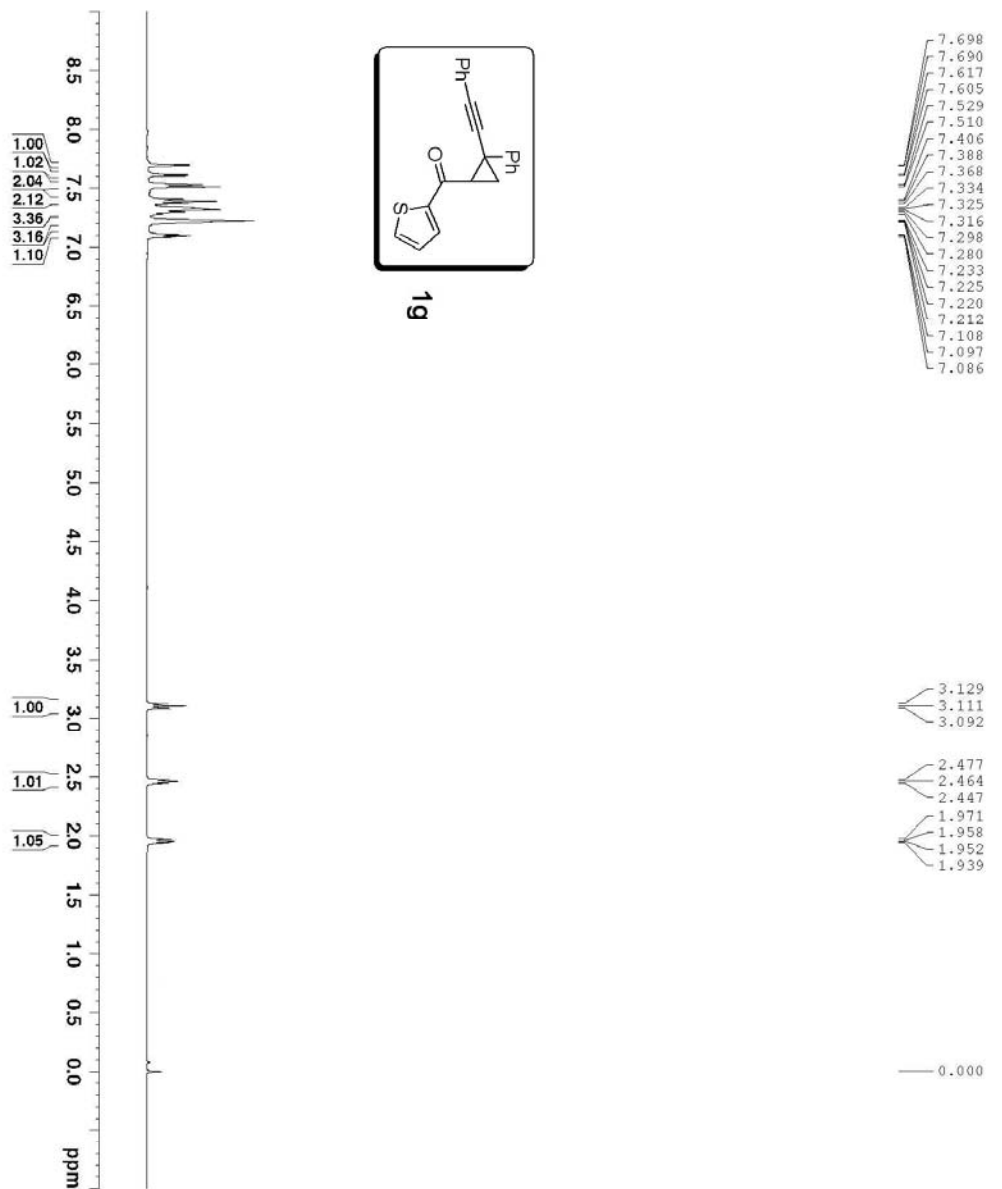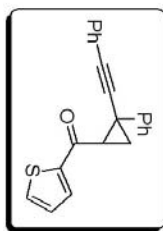

1g

```

NAME          zcm-449b
EXPNO         10
PROCNO        1
DATE_         20081219
TIME          8.15
INSTRUM       spect
PROBHD        5 mm PABO-BB-
PULPROG       zgpg30
TD            65536
SOLVENT       CDCl3
NS            16
DS            2
SWH           8223.685 Hz
FIDRES        0.122483 Hz
AQ            3.984718 sec
RG            71.8
DM            60.800 usec
DE            6.50 usec
TE            291.3 K
TDO           1.00000000 sec
===== CHANNEL f1 =====
NUC1          1H
P1            14.00 usec
PL1           0.00 dB
PL12          13.75590801 W
SFO1          400.1324710 MHz
SI            32768
SE            400.1300125 MHz
K1            0
SSB           0.30 Hz
LB            0
GB            0
PC            1.00
    
```

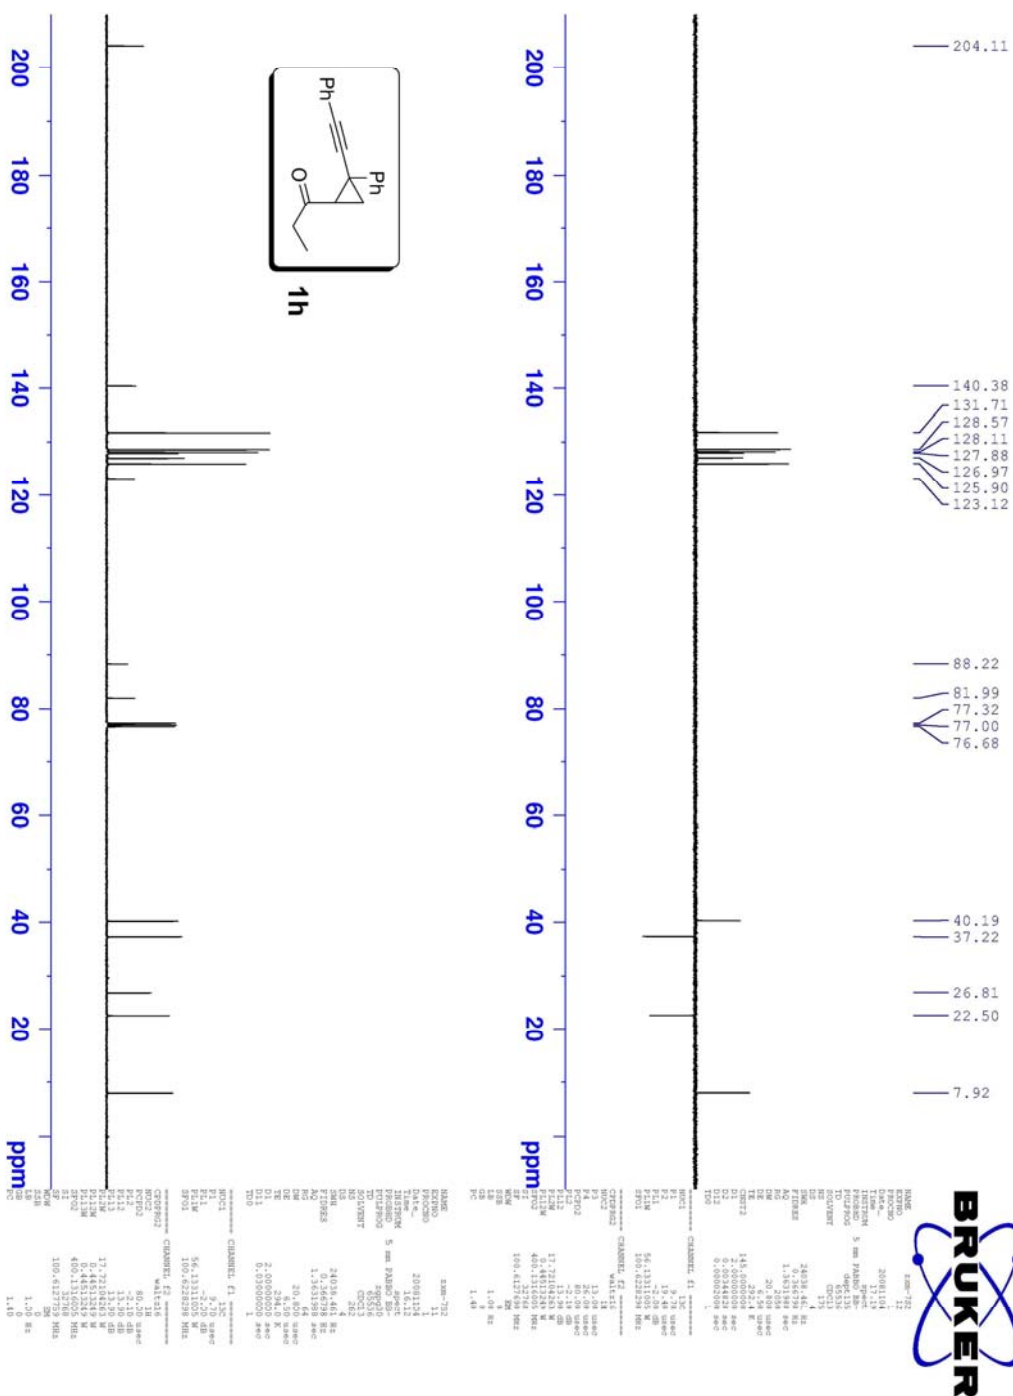

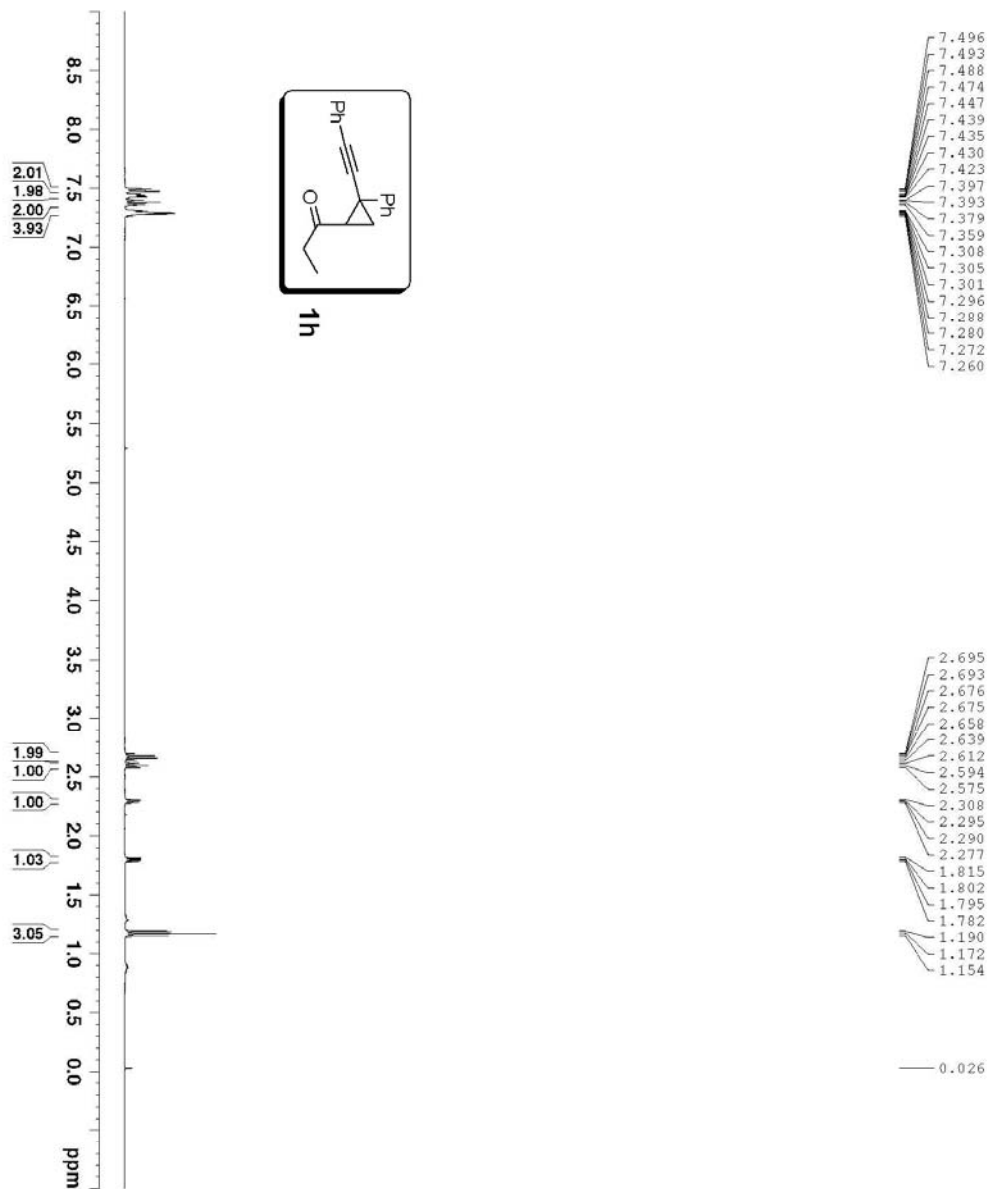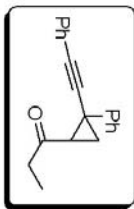

1h

```

NAME          zsm-7s2
EXPNO         10
PROCNO        1
F2 -         20081.01
F3 -         15.01
INSTRUM       spect
PROBHD        5 mm PABBO-BB-
PULPROG       zgpg30
PCPDPRG2      gpcp15
SOLVENT       CDCl3
NS            16
DS            2
SWH           8223.685 Hz
FIDRES        0.42483 Hz
AQ            3.98482 sec
RG            64
DW            60.800 usec
DE            6.50 usec
TE            292.9 K
TD            1
TDO           1.00000001 sec

===== CHANNEL f1 =====
NUC1          1H
P1            14.00 usec
PL1           -1.00 dB
PL12         13.75590801 W
SFO1          400.1324710 MHz
SI            32768
SEM          400.1300049 MHz
VSWR          0
SSB           0
LB            0.30 Hz
GB            0
PC            1.00
    
```

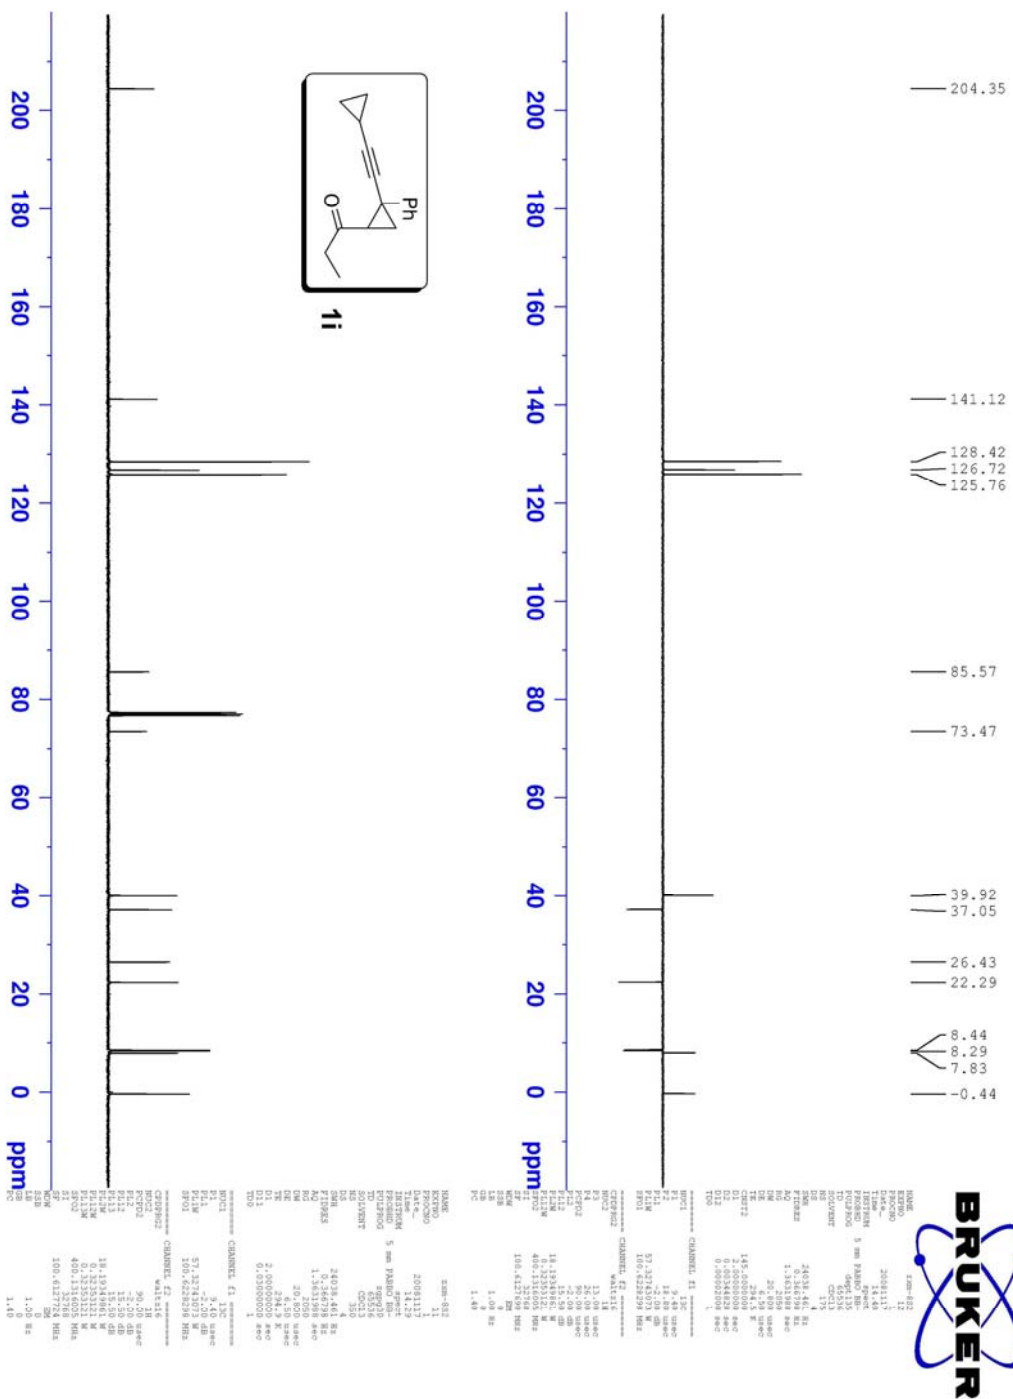



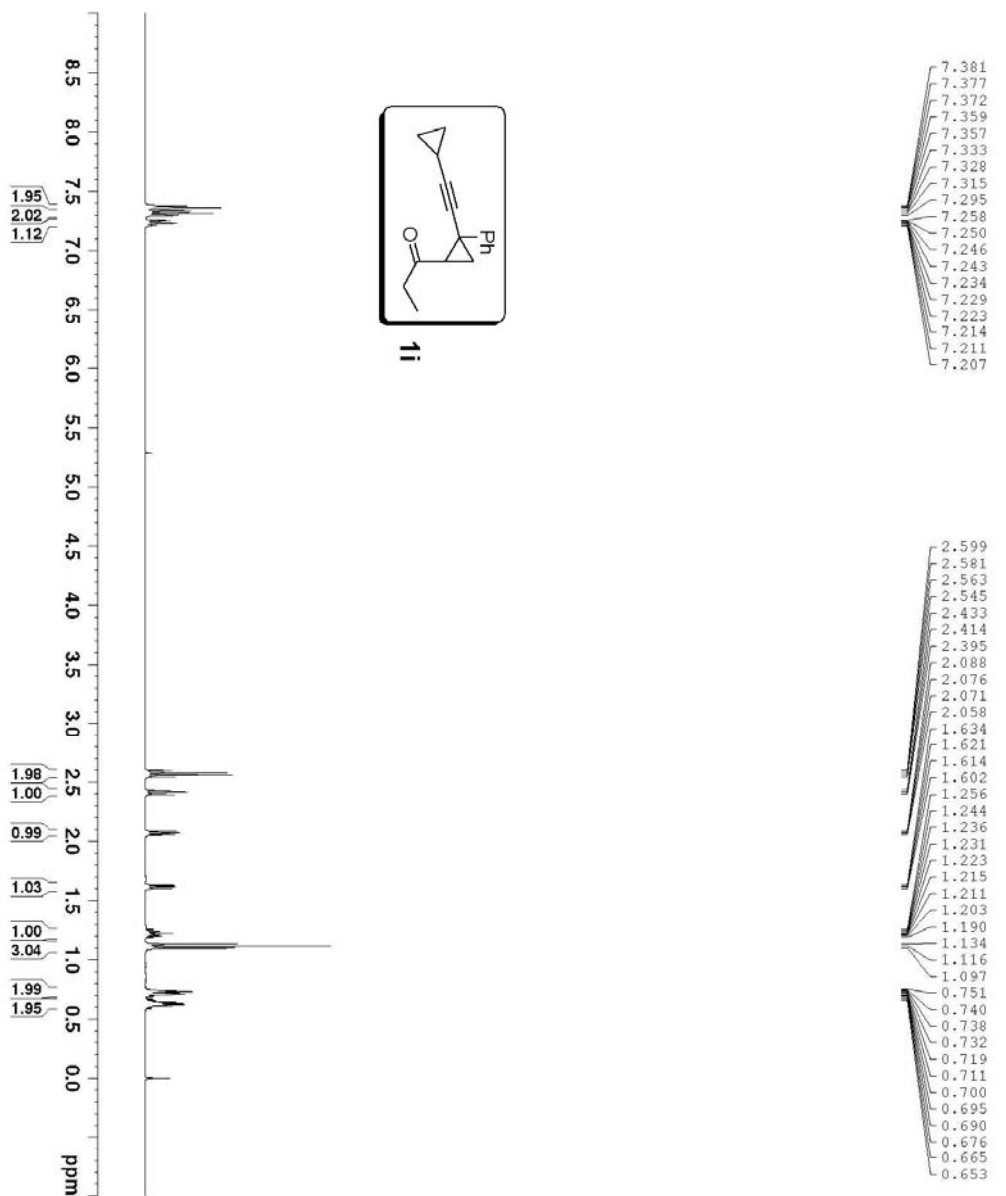

```

NAME          zxm-852
EXPNO         10
PROCNO        2
Date_         20081117
Time          14.08
INSTRUM       spect
PROBHD        5 mm PABBO-BB-
TD            65536
SOLVENT       CDCl3
NS            8
DS            2
AQ            0.223483 Hz
FIDRES        0.121483 Hz
AQ            3.9845397 sec
RG            114
DW            60.800 usec
DE            25.50 usec
TE            300.2 K
D1            1.00000000 sec
TD0           1

===== CHANNEL f1 =====
NUC1          13C
PULPROG       zgpg30
PC            14.40 usec
PL1           0.00 dB
PL12          11.47932053 W
SFO1          400.1324710 MHz
SI            32057
WDW            EM
SSB           0
LB            0.30 Hz
GB            0
PC            1.00
    
```

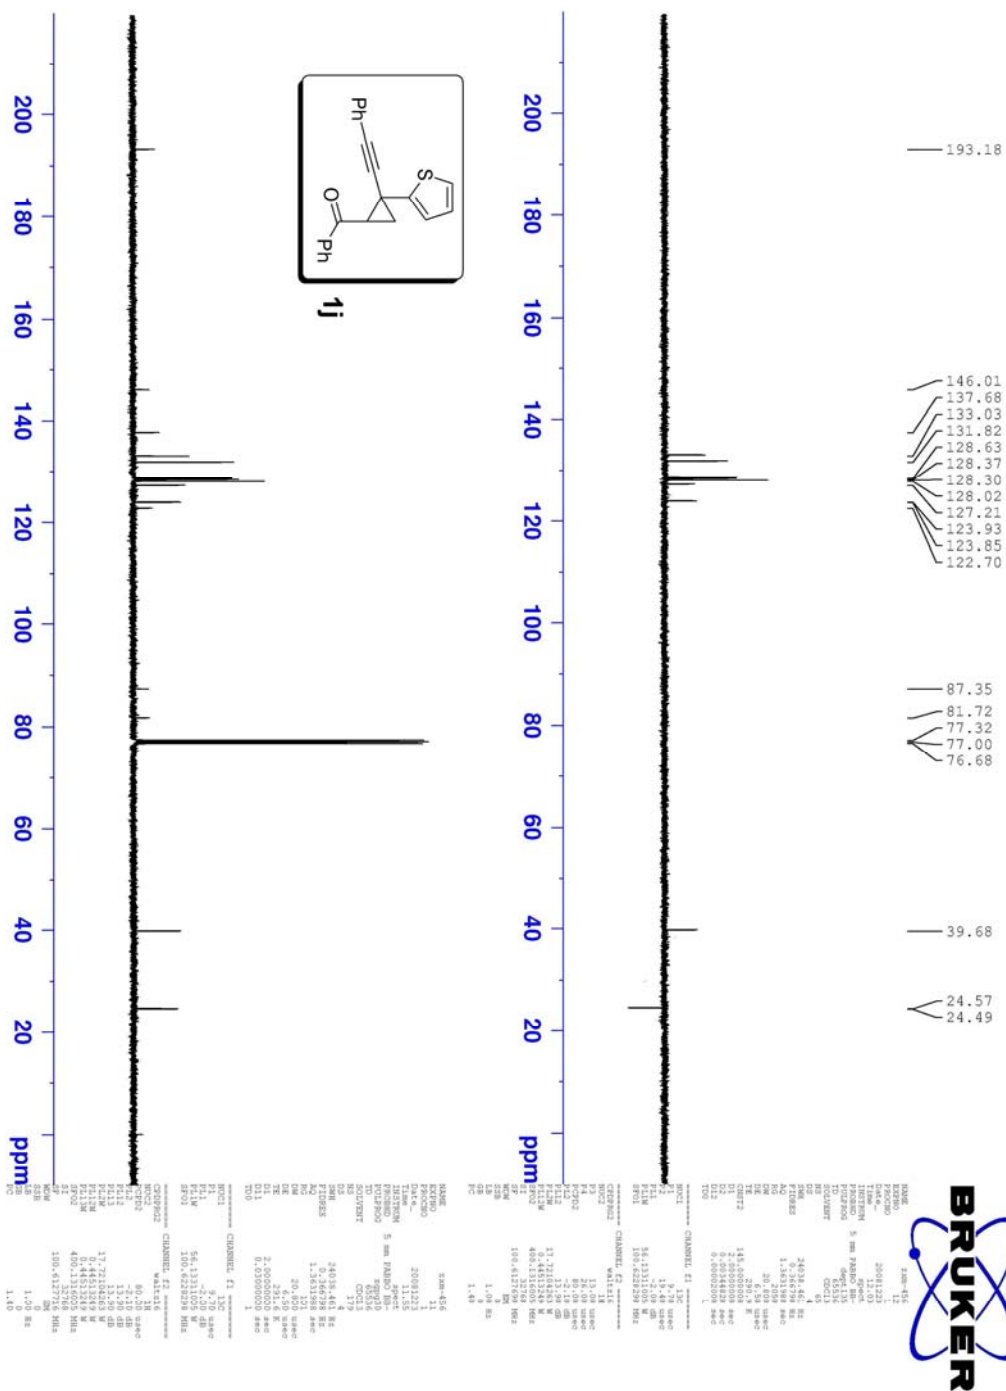

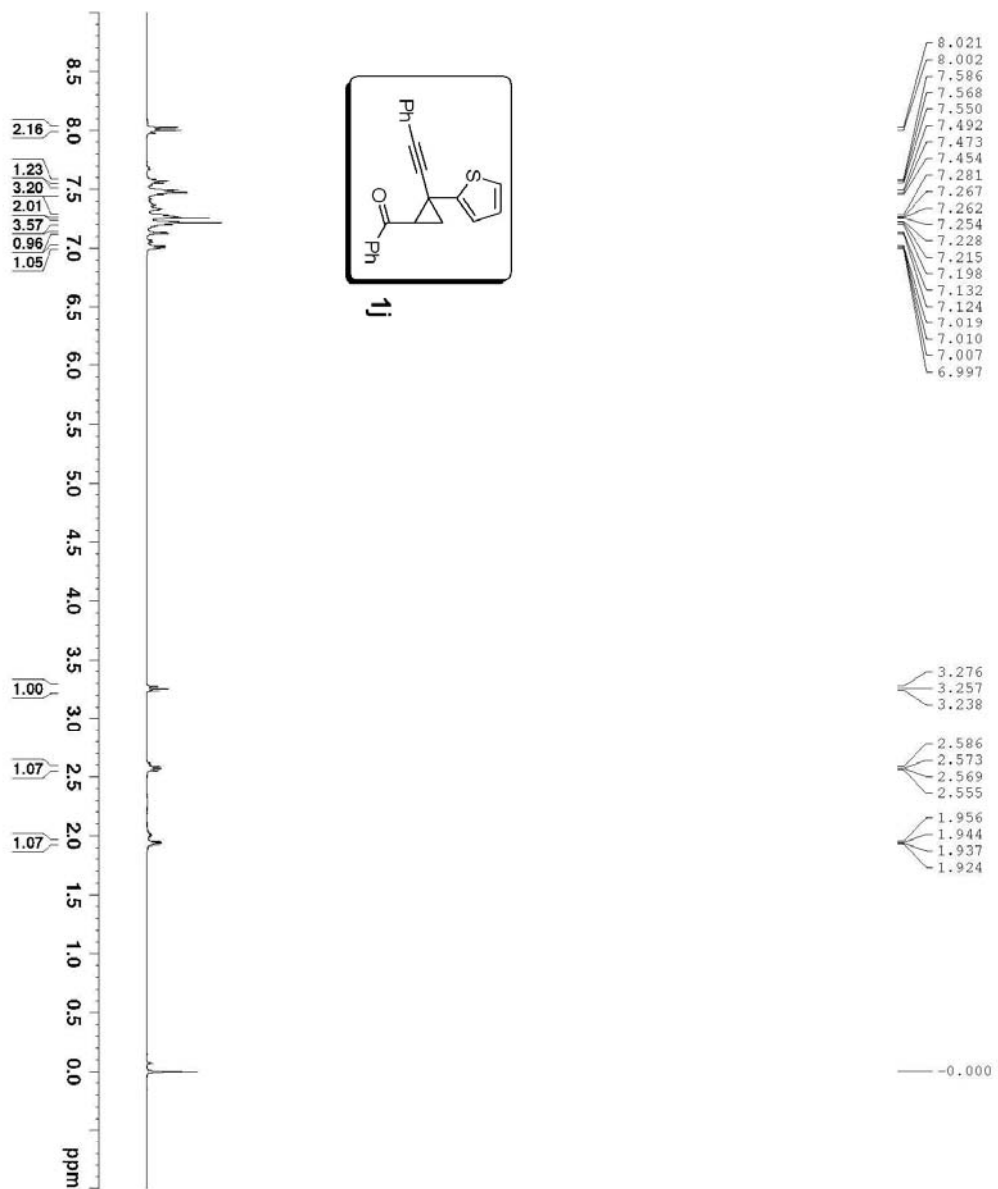

```

NAME          zsm-1292
EXPNO         10
PROCNO        1
Date_         20091229
Time          11.11
INSTRUM       spect
PROBHD        5 mm PABBO BB-
PULPROG       zgpg30
TD            65536
SFO1          400.132410
AQ            0.125483
RG            3.9846217
DS            2
SWH           8223.685
FIDRES        0.125483
AQ           3.9846217
RG            3.9846217
DE            60.800
TE            290.5
PC            1.00000000
===== CHANNEL f1 =====
NUC1           1H
P1            14.00
PL1           0.0000000
PL1W          13.75590801
SFO1          400.132410
SI            32788
SE           400.1300072
SF           400.1300072
WDW           EM
SSB           0
LB            0.30
GB            0
PC            1.00
    
```

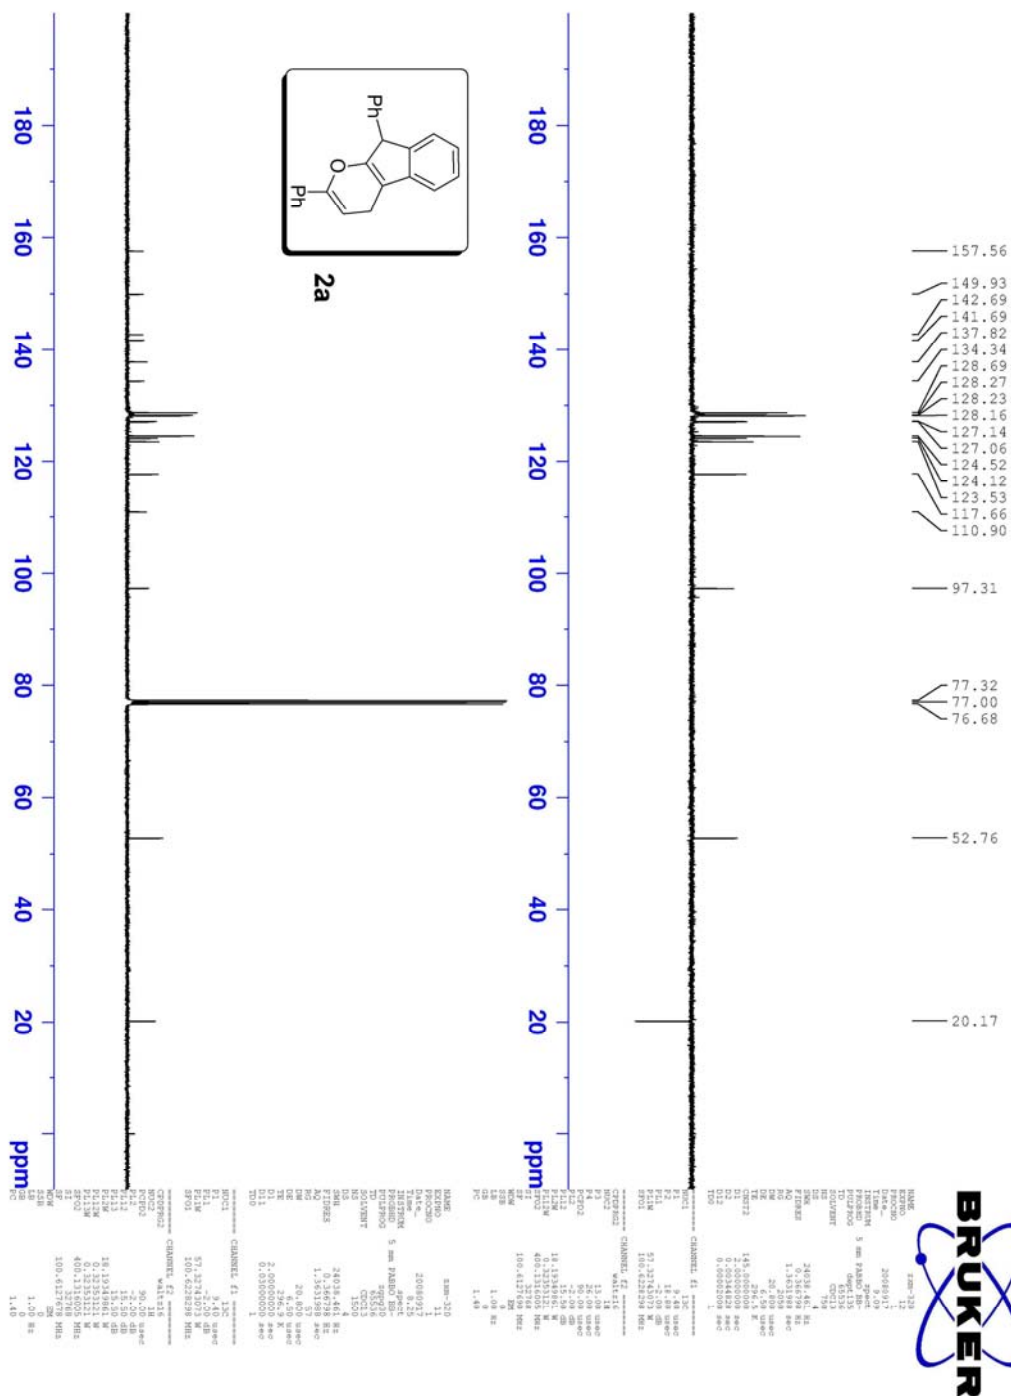

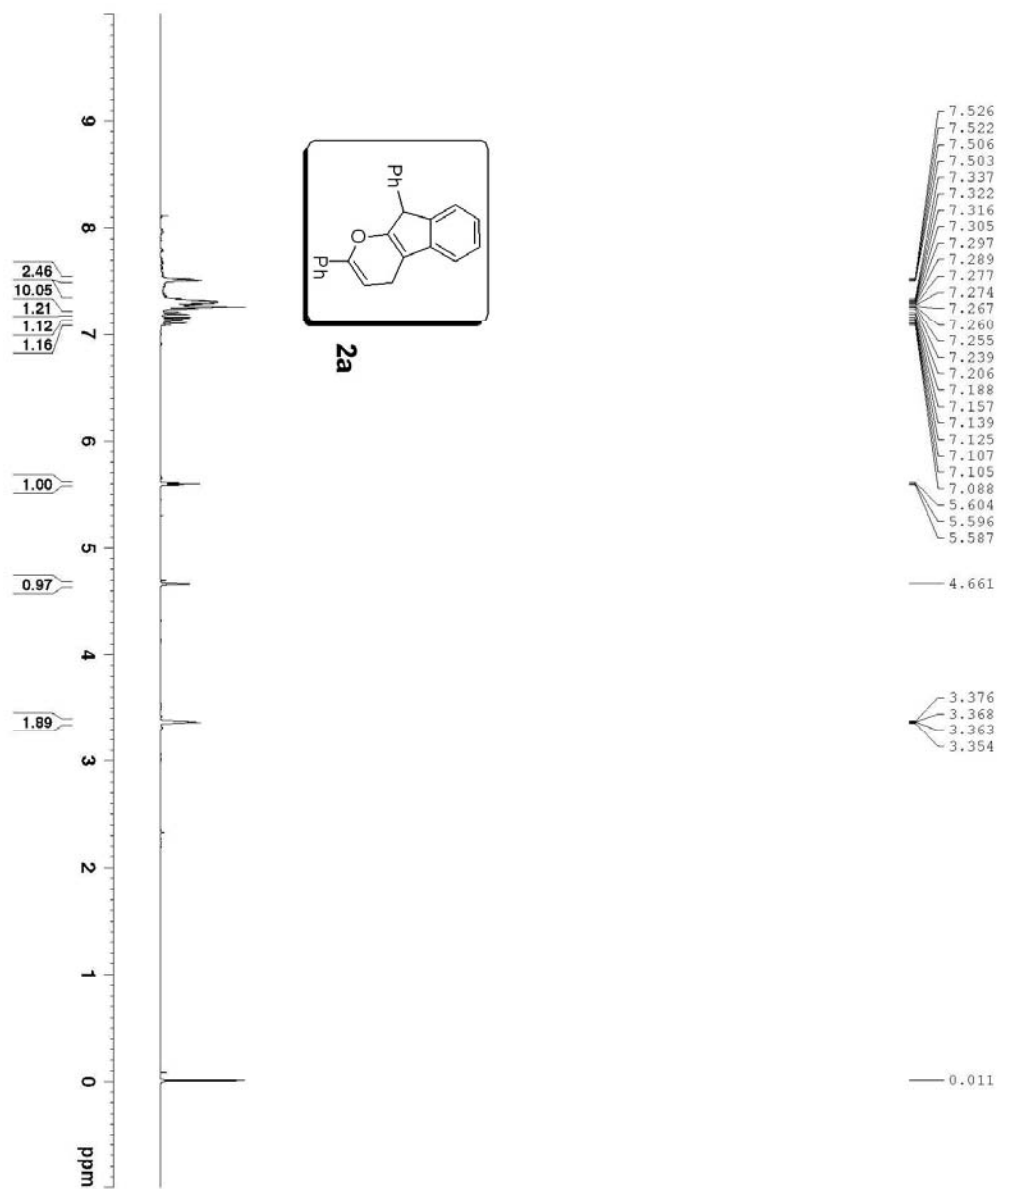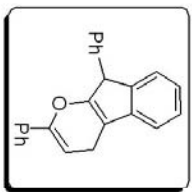

```

NAME          zsm-320
EXNO          10
PROCNO        20080917
Date_         11-07-08
Time          11:47:57
INSTRUM       spect
PROBHD        5 mm PABBO-BB-
PULPROG       zgpg30
F2          400.1300944
F1          400.1300944
TD            65536
AQ            6.50
RG            65536
DS            2
SWH           8223.685 Hz
FIDRES        0.1225483 Hz
AQ            3.9842287 sec
RG            60.800 usec
DW            6.50 usec
DE            296.3 K
TE            300.2 K
SFO1          1.00000000 sec
===== CHANNEL f1 =====
NUC1          1H
P1            14.00 usec
PL1           0.00 dB
PL1W          11.47923053 W
SFO1          400.1324710 MHz
SI            32768
SF           400.1300944 MHz
WDW           EM
SSB           0
LB            0.30 Hz
GB            0
PC            1.00
    
```

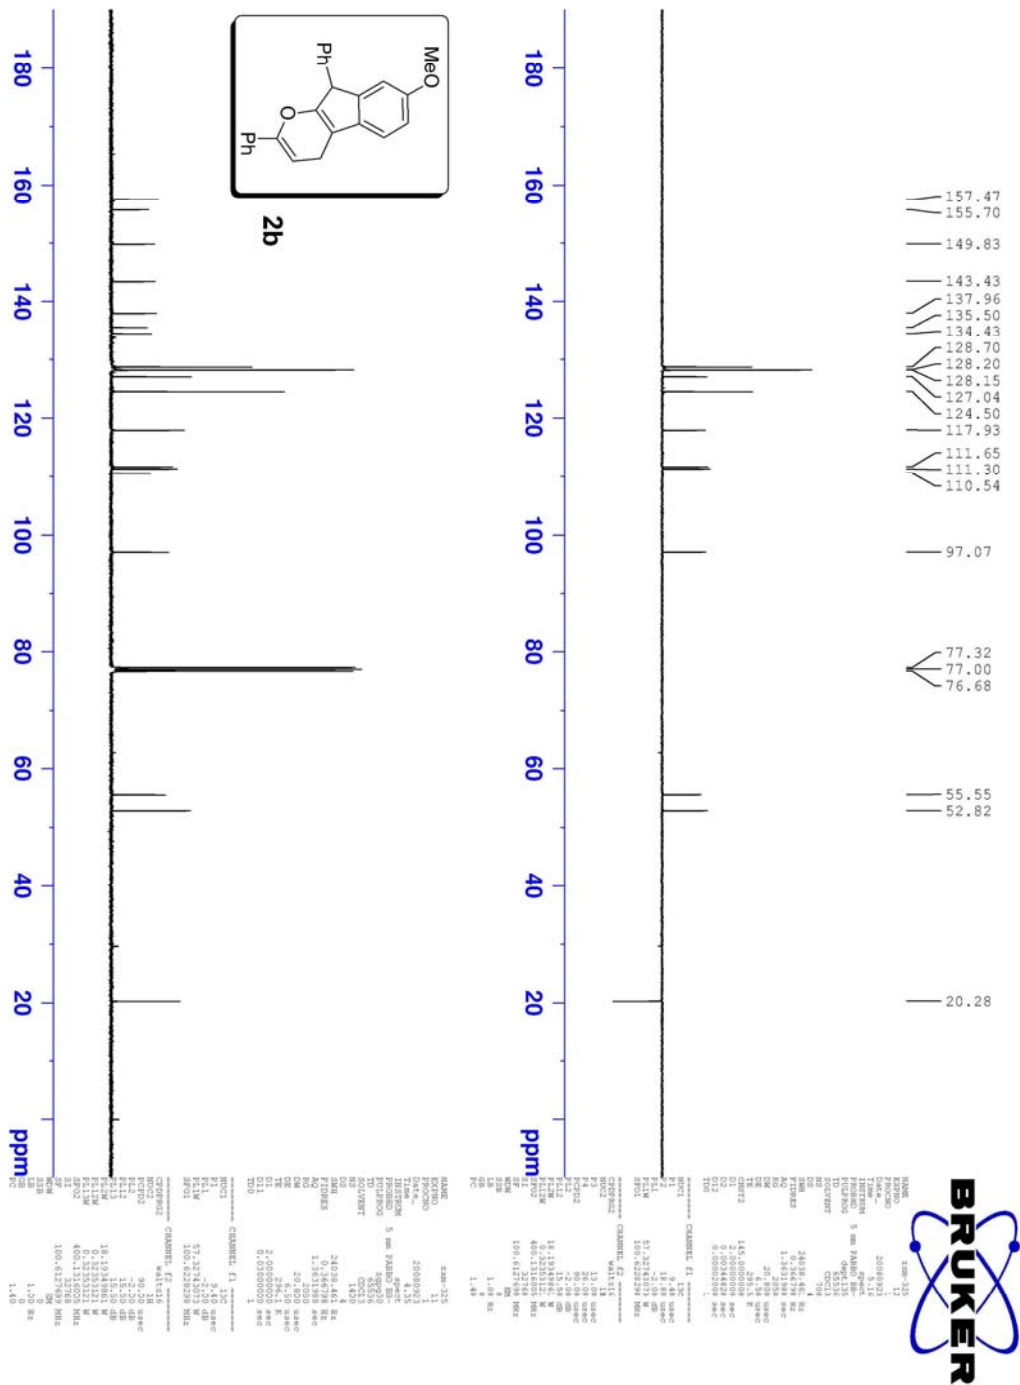

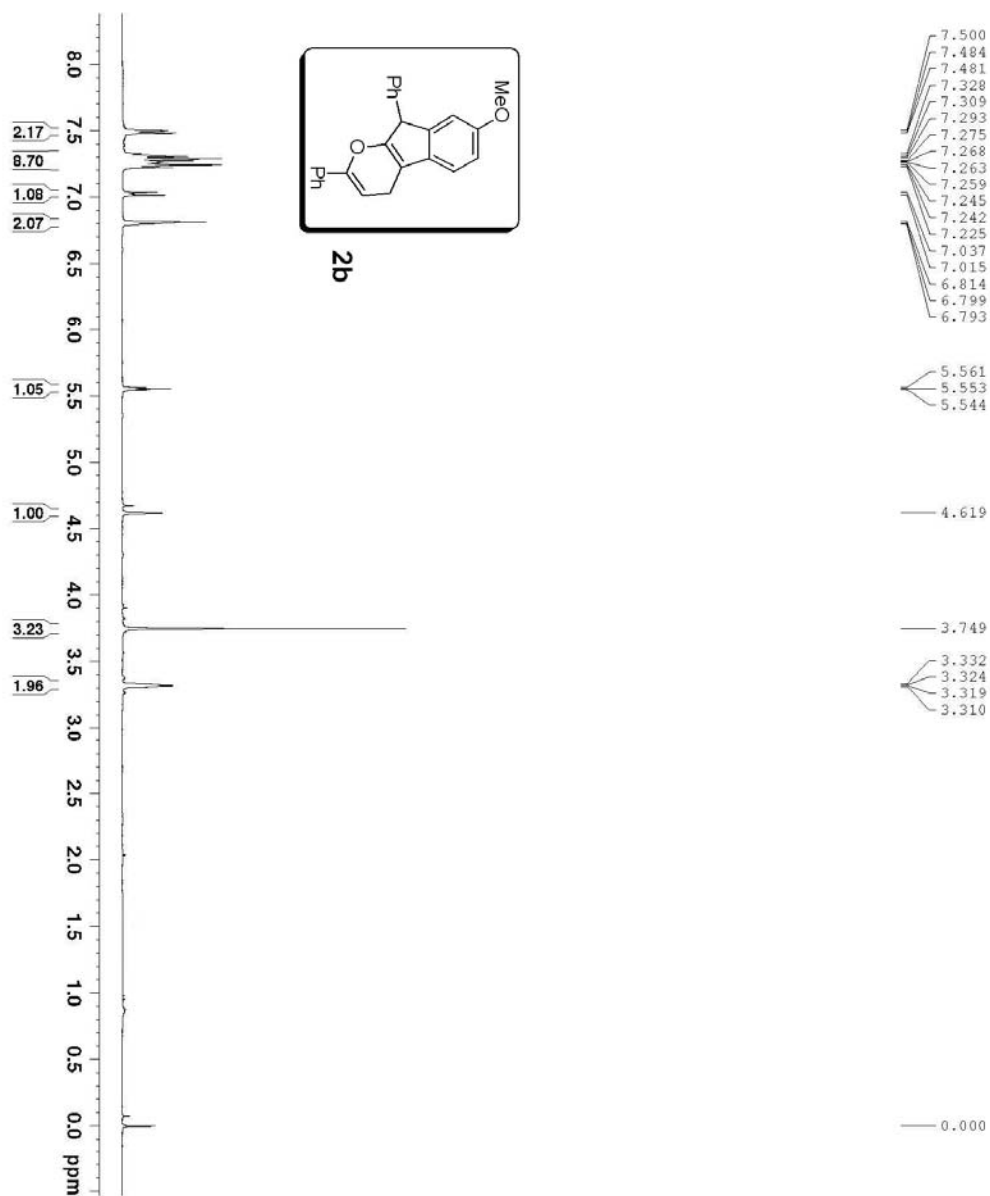

```

NAME          zxm-325
EXPNO         10
PROCNO        20080921
Time          3.14
INSTRUM       spect
PROBHD        5 mm PABBO BR-
PULPROG       zgpg30
TD            65536
SOLVENT       CDCl3
NS            40
DS            2
SWH           8223.685 Hz
AQ            0.04387 sec
RG            3.934587 sec
FIDRES        0.228
AQRES         60.800 usec
DE            6.50 usec
TE            295.2 K
D1            1.00000000 sec
TD0           1

===== CHANNEL f1 =====
NUC1          1H
P1            14.48 usec
PL1           0.00 dB
PL1W         11.47932053 W
SFO1         400.1324710 MHz
SI            32768
WDW           EM
SSB           0
LB            0.30 Hz
GB            0
PC            1.00
    
```

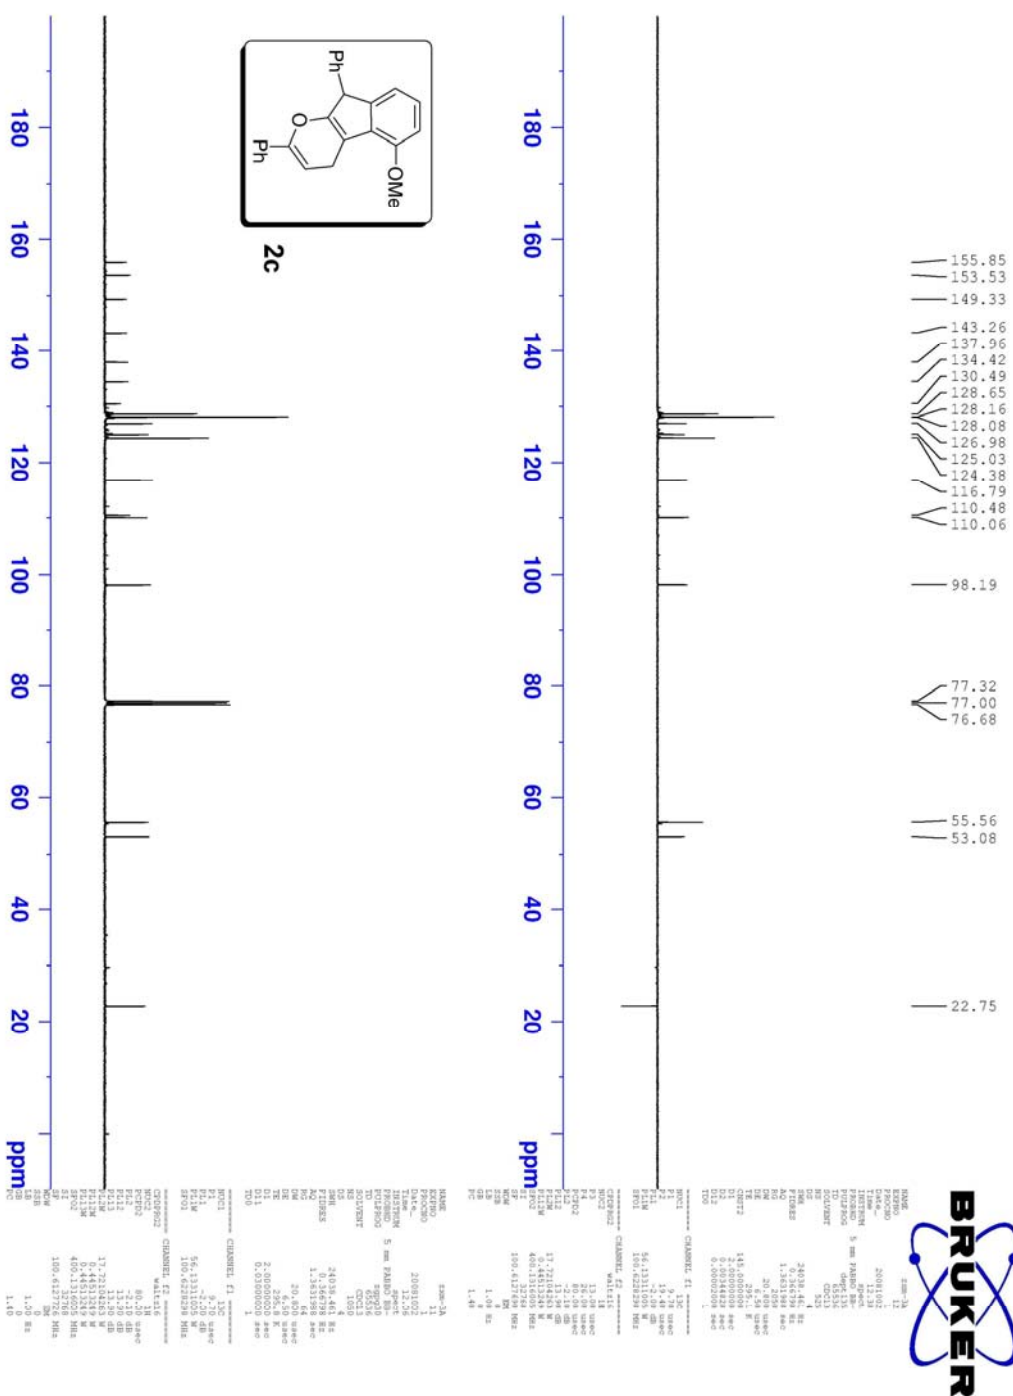



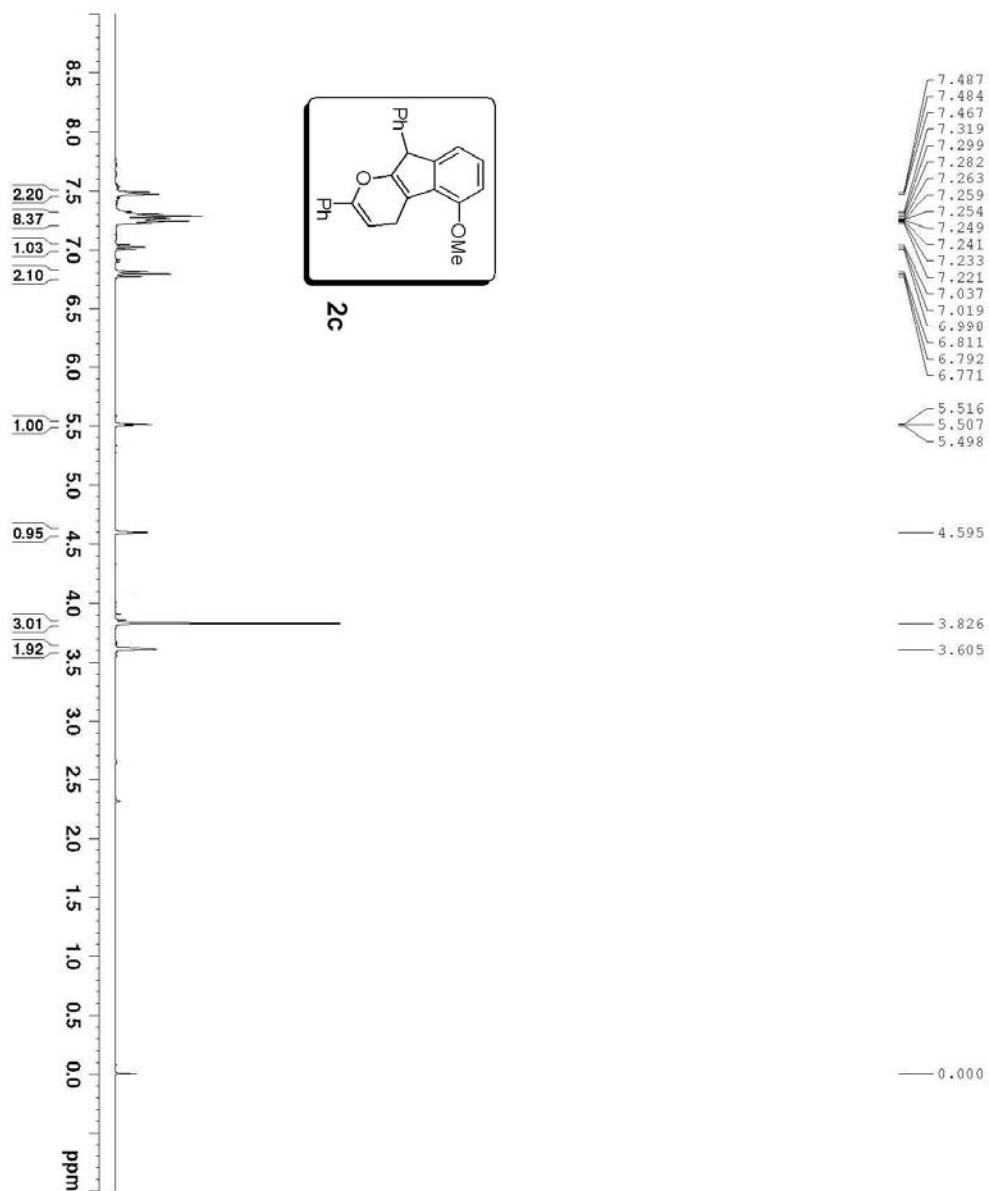

```

NAME          zcm-3A
EXPNO         10
PROCNO        1
DATE_         2009102
TIME         11:02
INSTRUM       spect
PROBHD        5 mm PABO-BB-
PULPROG       zgpg30
TD            65536
SOLVENT       CDCl3
NS            32
DS            2
SWH           8223.685 Hz
FIDRES       0.122483 Hz
AQ           3.9844101 sec
RG           60.800 usec
DE           6.50 usec
TE           293.7 K
DQ           1.0000000 sec
TD0           1

===== CHANNEL f1 =====
NUC1          1H
P1            14.00 usec
PL1           0.00 dB
PL1W         13.75590801 W
SFO1         400.1324710 MHz
SI           32768
SE           400.1300229 MHz
KRG          0
SSB          0
LB           0.30 Hz
GB           0
EC           1.00
    
```

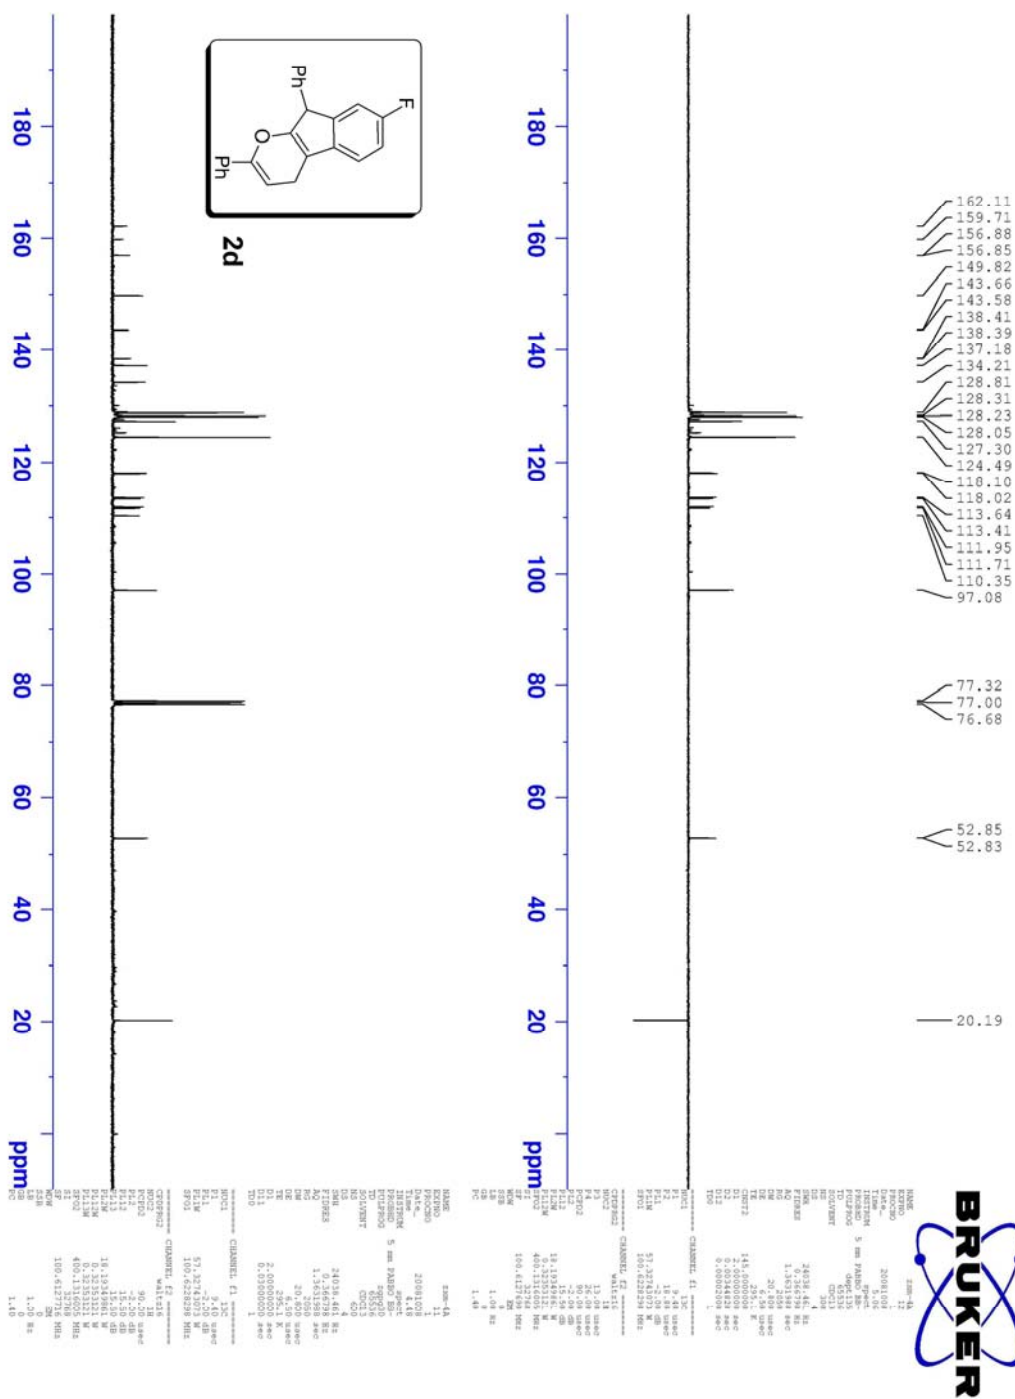

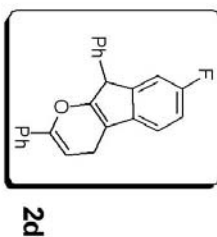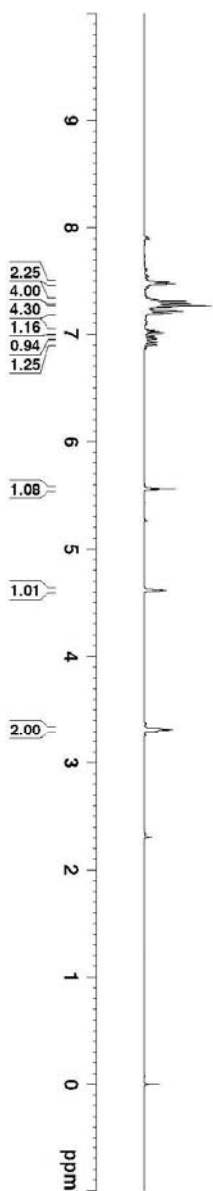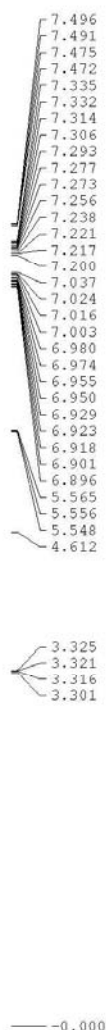

```

NAME          zcm-4A
EXPNO         10
PROCNO        20081007
Date_         20-27
Time          20:27
INSTRUM      spect
PROBHD       5 mm PABBO BR-
PULPROG      zgpg30
TD           65536
SOLVENT      CDCl3
NS           16
DS           2
SWH           923.682 Hz
FIDRES       0.122483 Hz
AQ           3.984287 sec
RG           71.8
WDW          EM
SSB          0
LB           0.30 Hz
GB           0
PC           1.00
===== CHANNEL f1 =====
NUC1          13C
P1           14.70 usec
PL1          -1.00 dB
PL1W        13.75590801 W
SFO1        400.132410 MHz
SI           32
SF           400.1300282 MHz
WDW          EM
SSB          0
LB           0
GB           0
PC           1.00
    
```

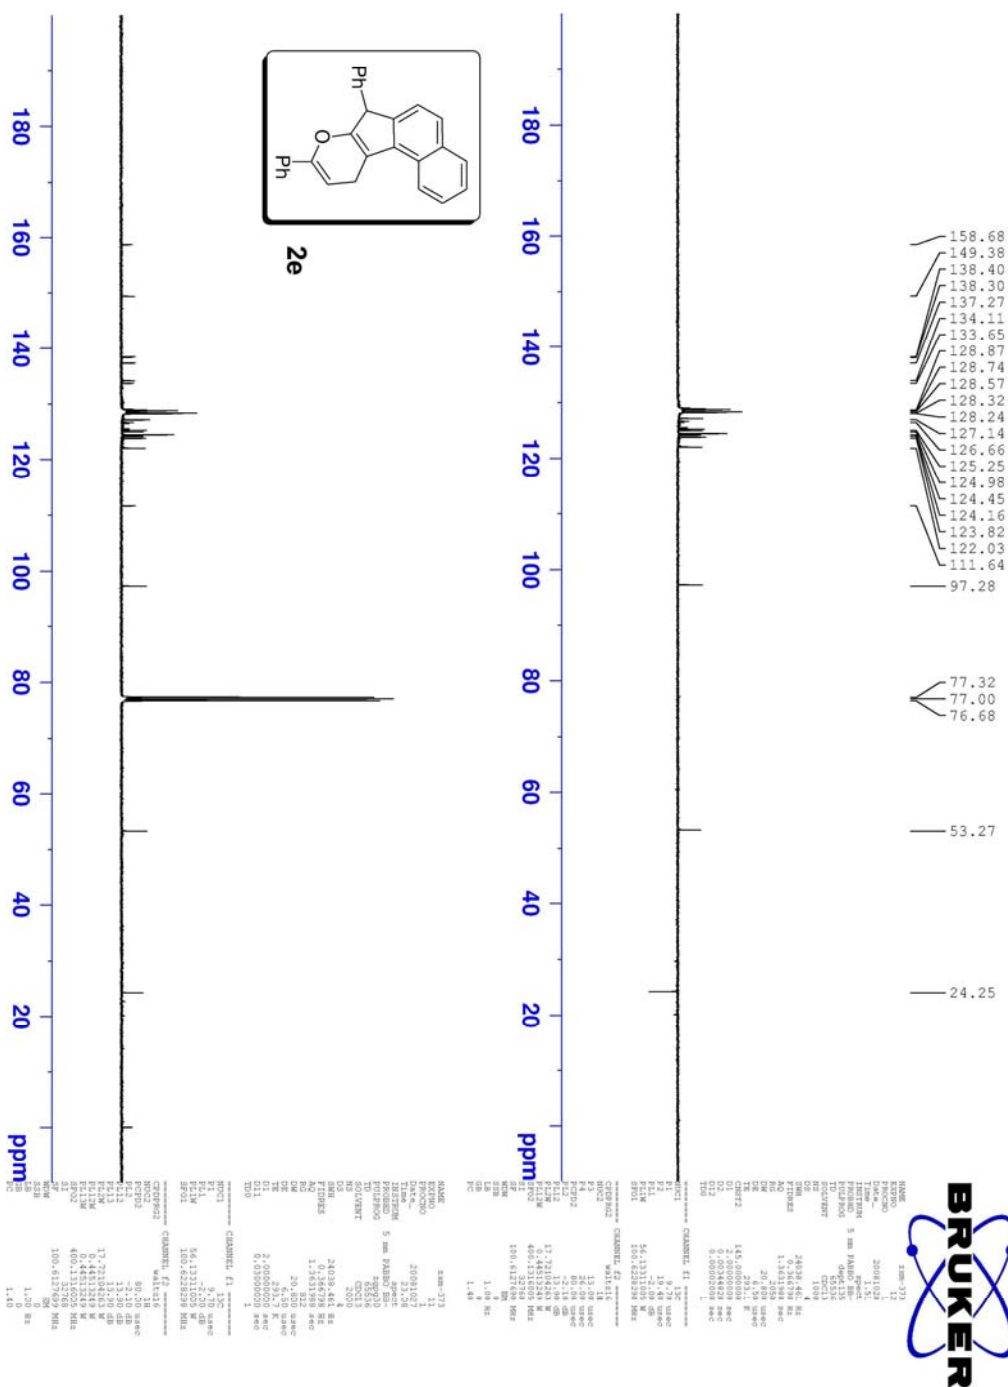

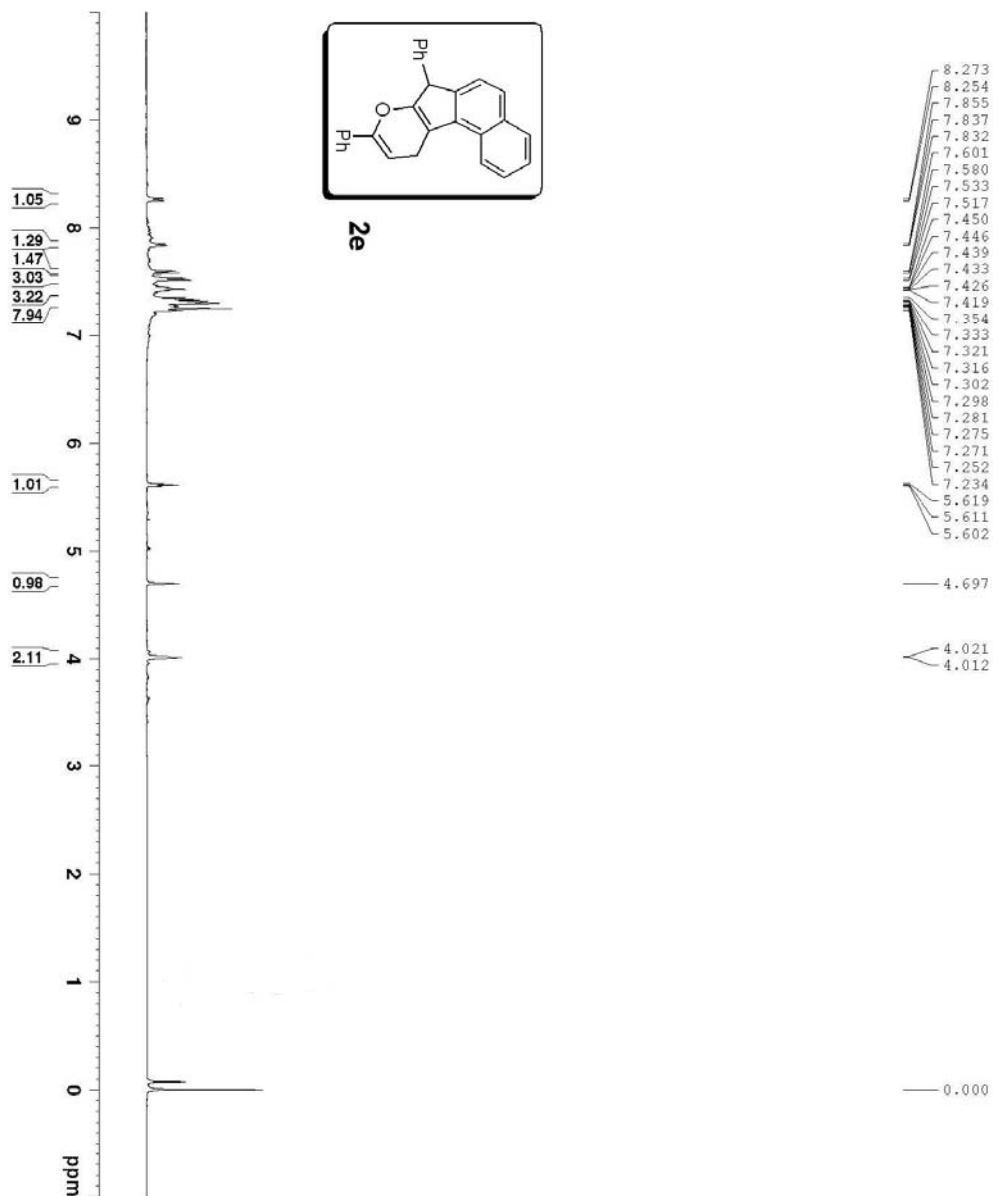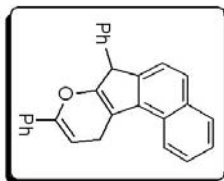

```

NAME                Zsm-1B
EXPNO                1
PROCNO              1
Date_              20081028
Time              21.48
INSTRUM             spect
PROBHD              5 mm PABBO
PULPROG             zgpg30
TD                  65536
SOLVENT             CDCl3
NS                  40
DS                   90
SWH                 8273.685 Hz
FIDRES              0.125483 Hz
AQ                  3.9846387 sec
RG                   101
EM                   60
EN                   101 usec
TE                  292.9 K
D1                   1.00000000 sec
TD0                  1

===== CHANNEL f1 =====
NUC1                 1H
P1                   14.70 usec
PL1                  -1.00 dB
PL12                 13.7658901 W
PL13                 400.1330811 MHz
SI                   32768
SF                   400.1300086 MHz
WDW                  EM
SSB                   0
GB                   0.30 Hz
PC                   1.00
    
```

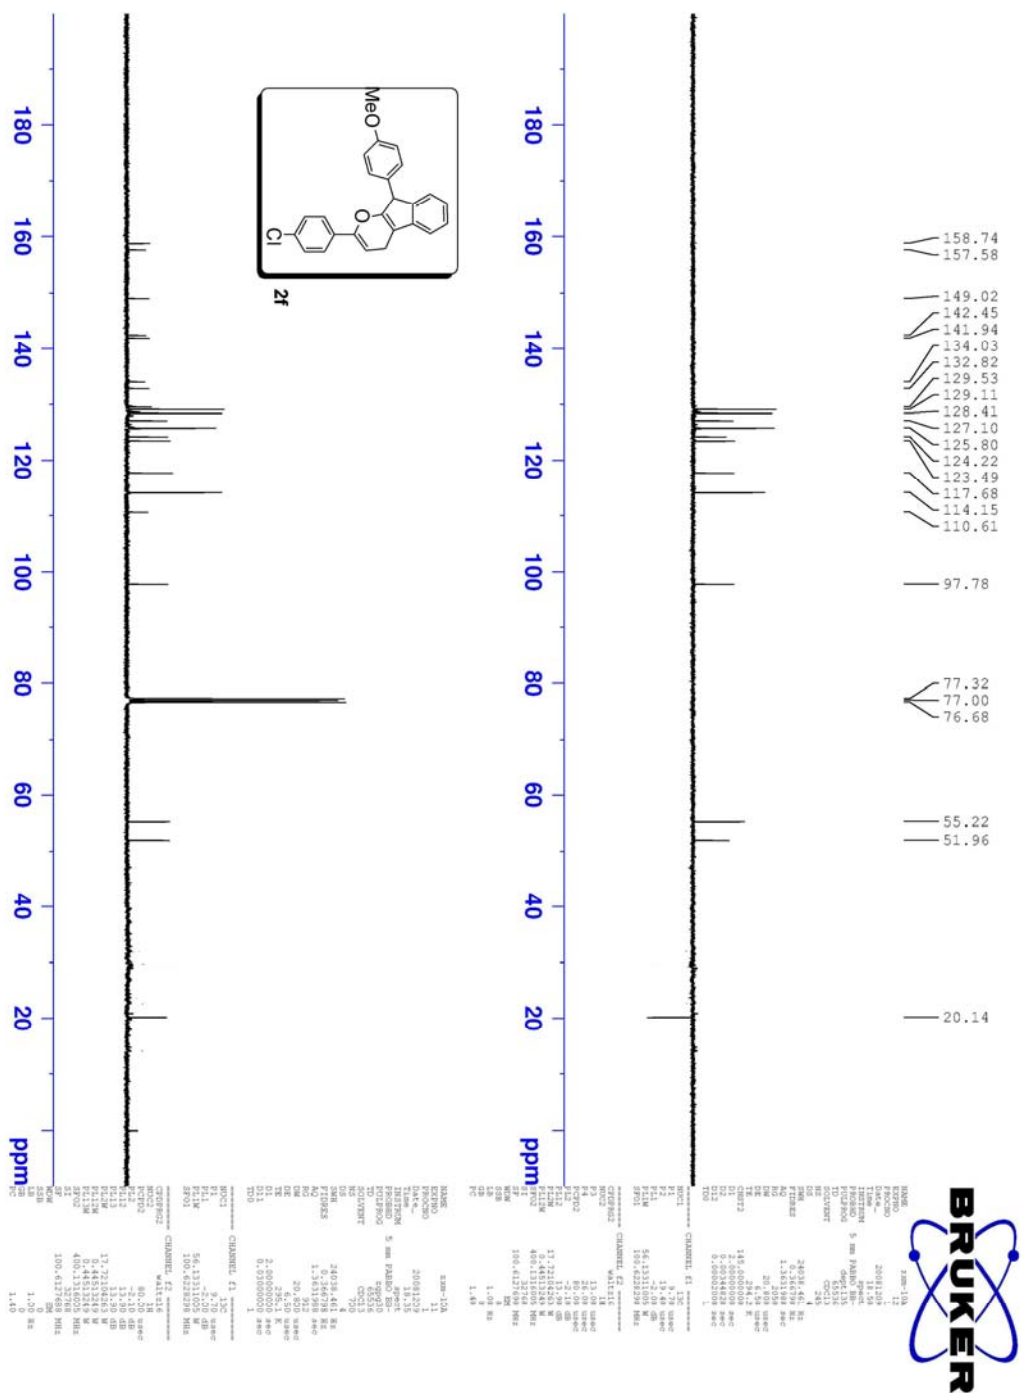

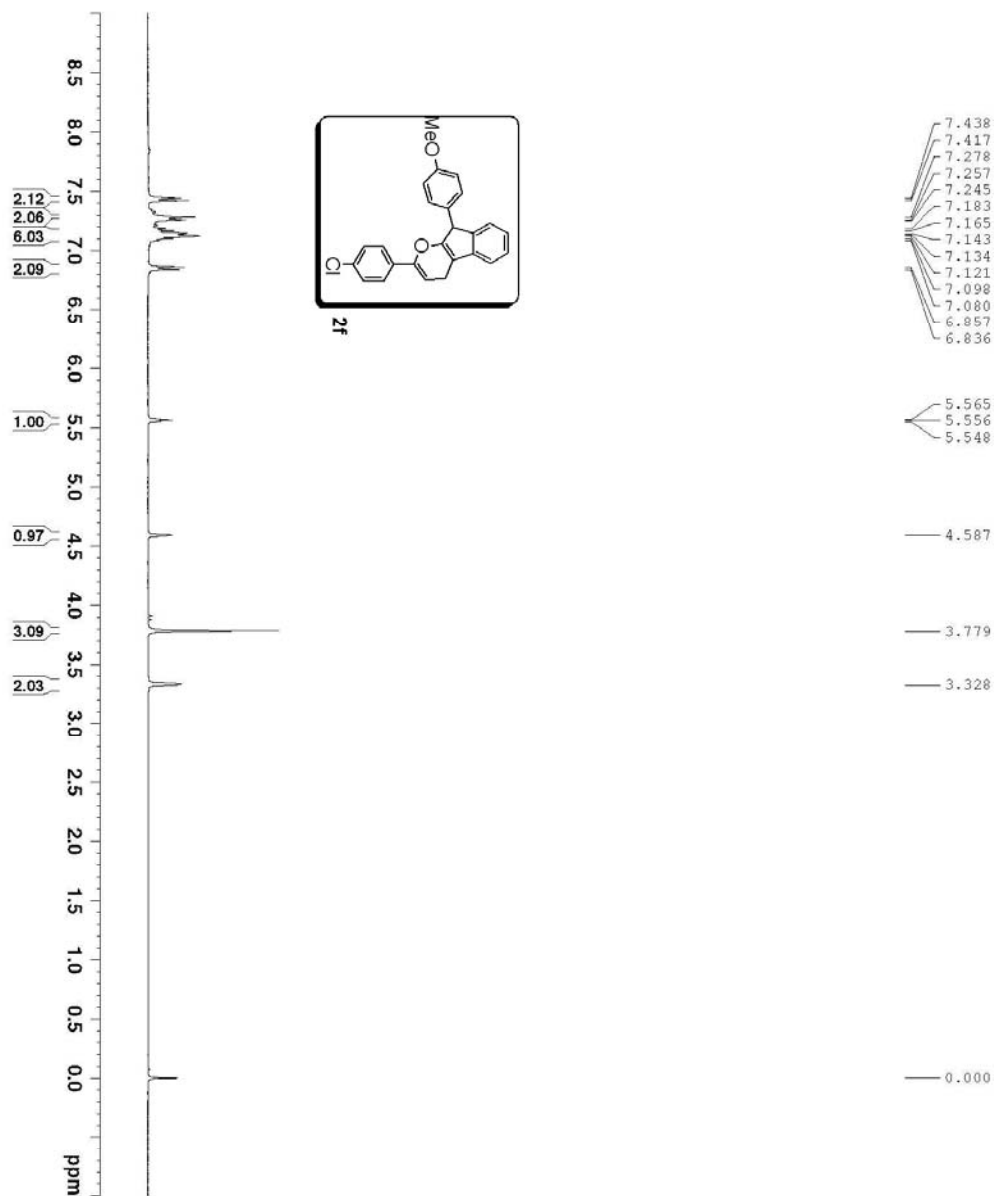

```

NAME                zxm-10A
EXPNO                1
PROCNO               1
Date_                20081209
Time                 17.54
INSTRUM              5 mm PABBO BBO
PROBHD               EASY-1H
PULPROG              zgpg30
TD                   65536
SOLVENT              CDCl3
NS                   16
DS                   2
AQ                   9223.682 Hz
FIDRES               0.125483 Hz
AQ                   3.9846387 sec
RG                   101
DM                   60.800 usec
DE                   23.50 usec
TE                   293.2 K
D1                   1.00000000 sec
TD0                  1

===== CHANNEL f1 =====
NUC1                 1H
P1                   14.70 usec
PL1                  -1.00 dB
PL1W                 13.75590801 W
SFO1                 400.1324710 MHz
SF                   400.1300100 MHz
WDW                  EM
SSB                  0
LB                   0.30 Hz
GB                   0
SB                   1.00
    
```

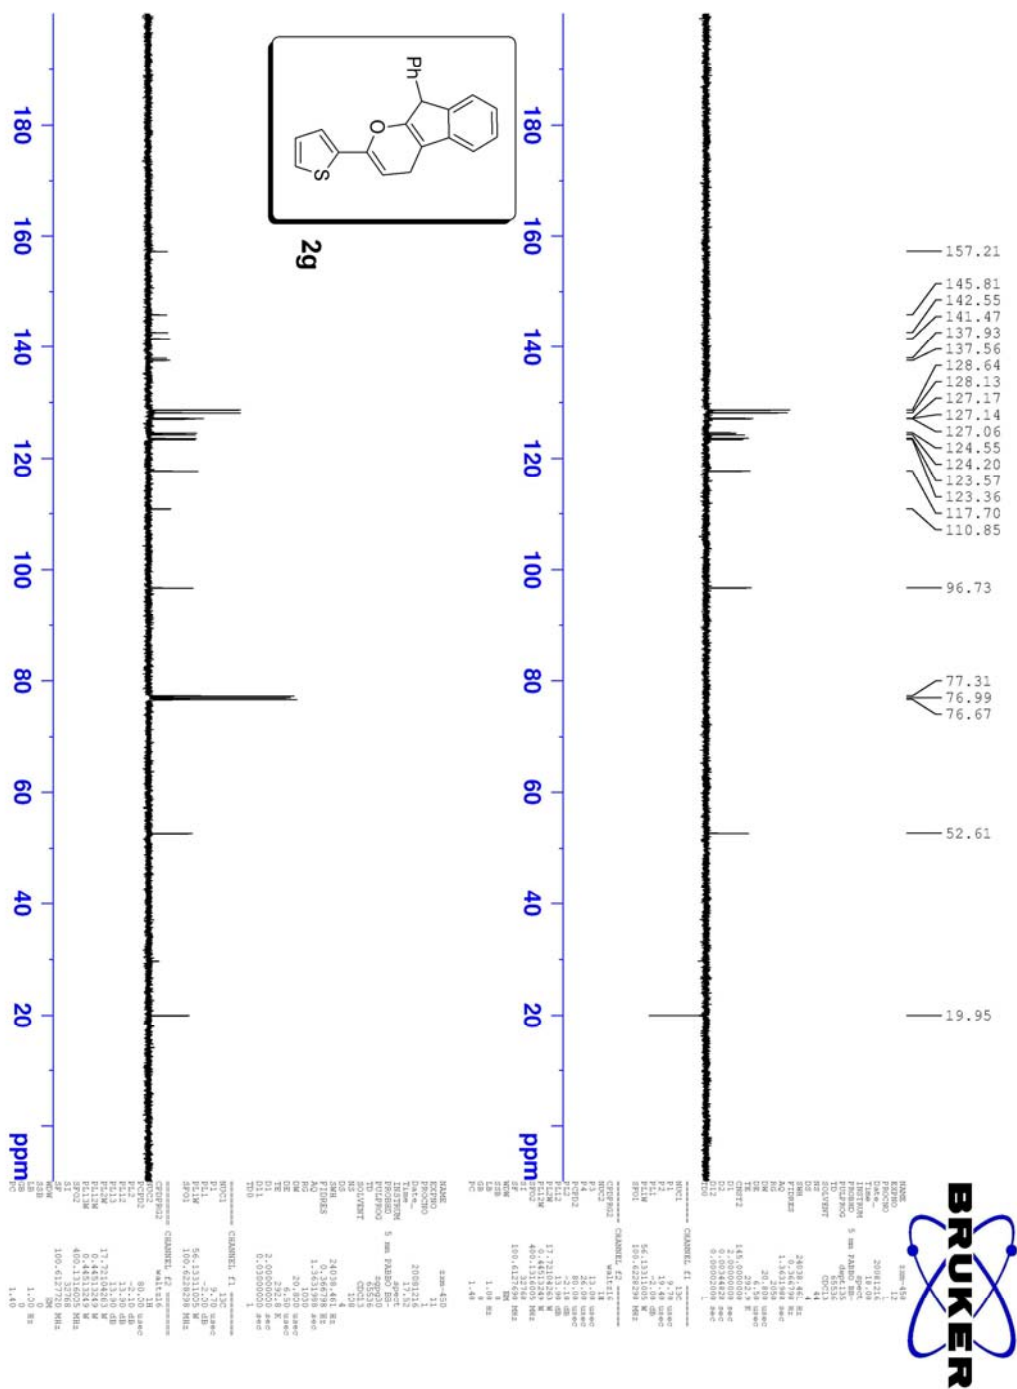



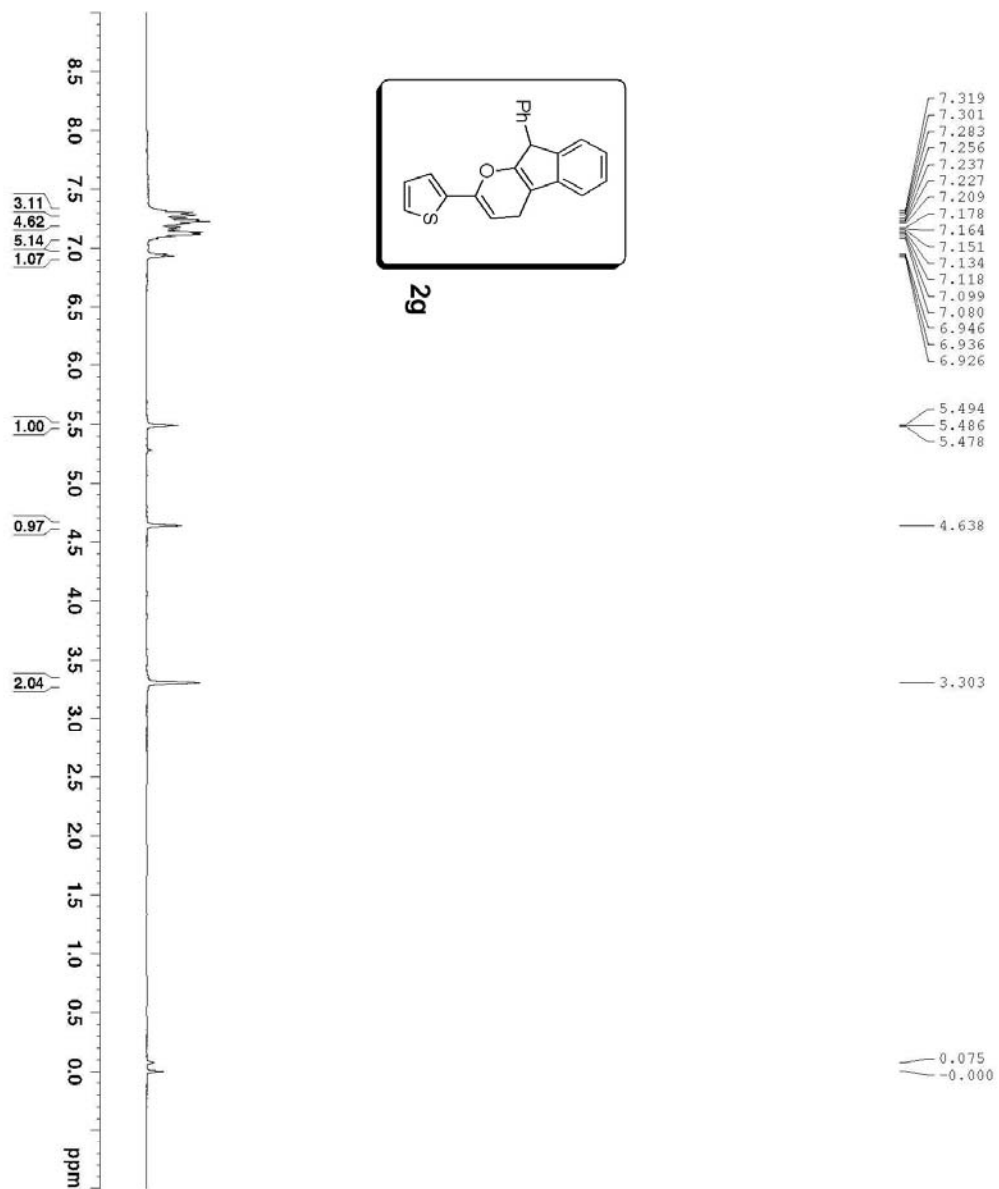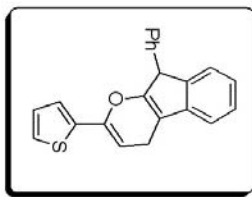

**2g**

```

NAME          zsm-450
EXPNO         10
PROCNO        1
Date_         20091210
Time         17:10
INSTRUM       spect
PROBHD        5 mm PABBO BB-
PULPROG       zgpg30
TD            65536
SFOVENT       0
DS            2
SWH           8223.685 Hz
AQ           0.122483 Hz
RG           3.9849114
WDW           60.800 usec
DE           6.50 usec
TE           292.3 K
T0           1.00000000 sec
T10          1

===== CHANNEL f1 =====
NUC1          1H
P1           14.00 usec
PL1          0.00 dB
PL1W         13.75590801 W
SFO1         400.1324710 MHz
SI           32768
SFO2         400.1300191 MHz
SFO3         0
SSB          0
LB           0.30 Hz
GB           0
PC           1.00
    
```

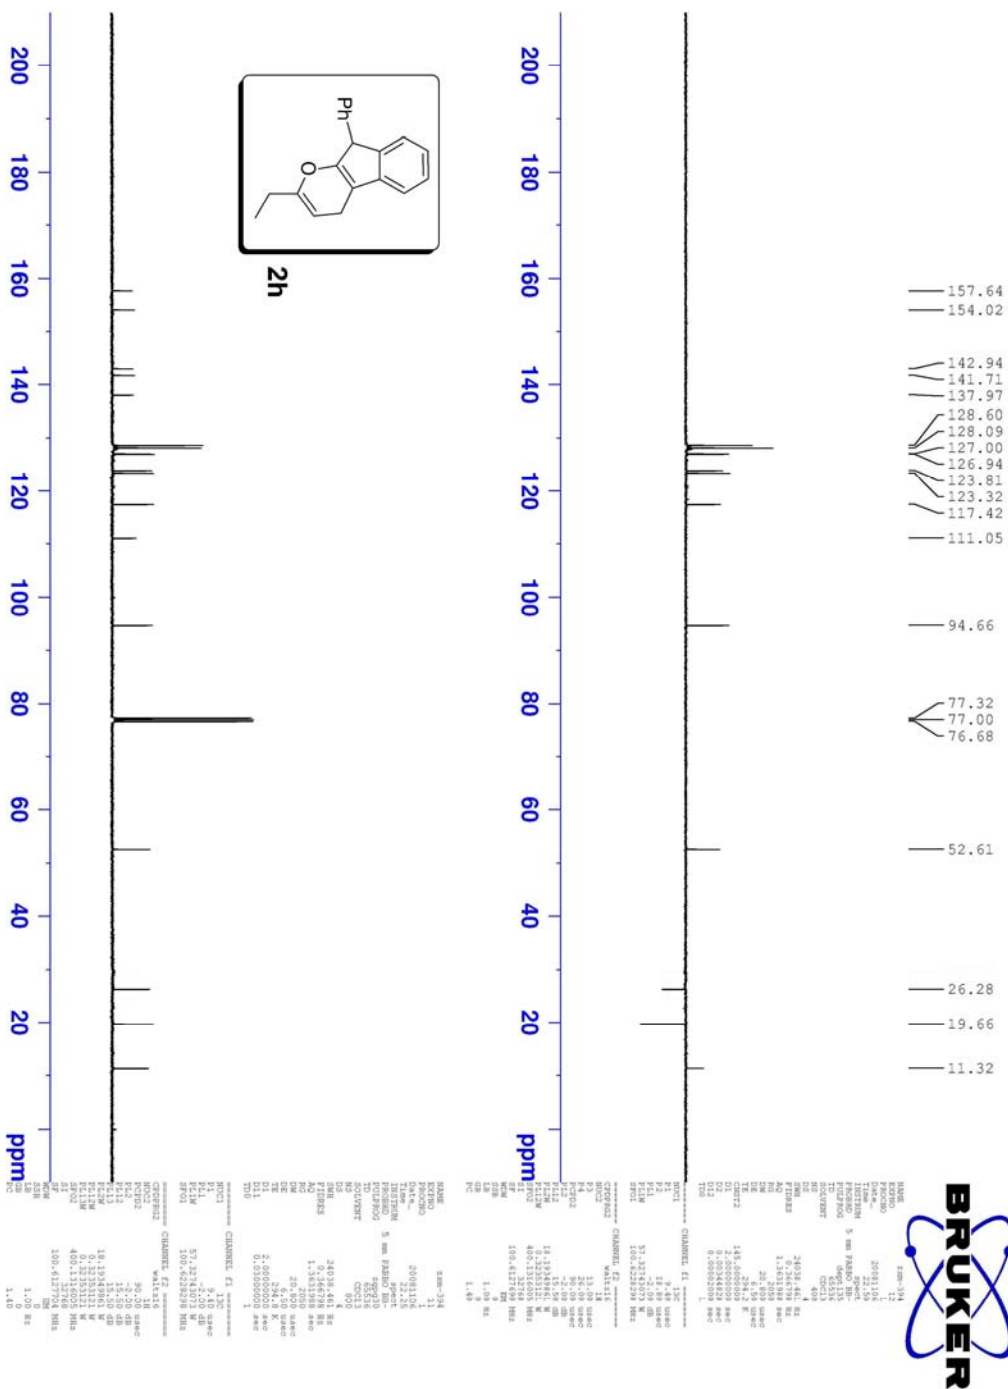

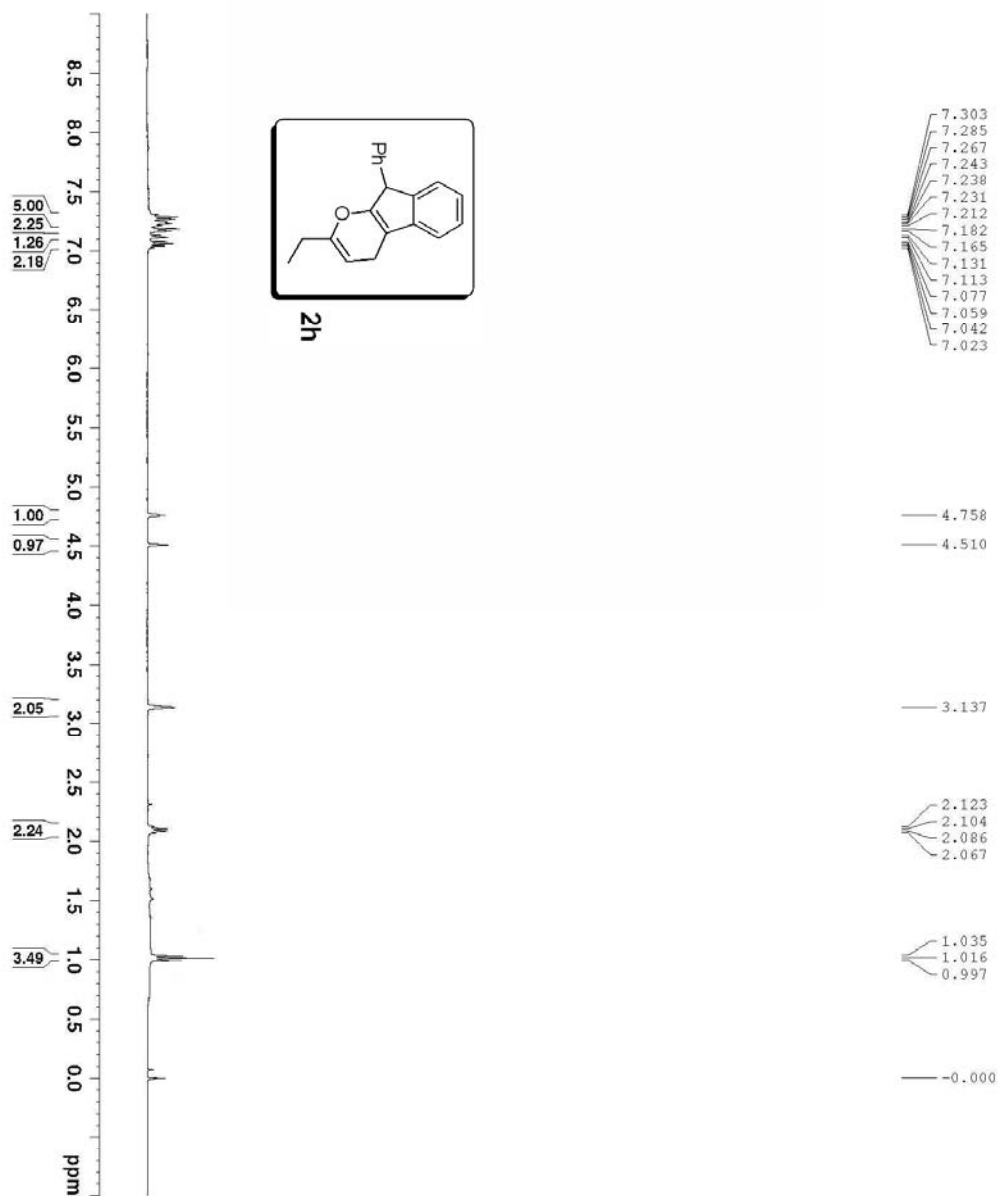

```

===== CHANNEL f1 =====
NAME          zxm-394
EXPNO         10
PROCNO        20081106
Date_         21.38
Time          5 mm PABBO BR-
INSTRUM       spect
PROBHD        5 mm PABBO BR-
PULPROG       zgpg30
TD            65536
SOLVENT       CDCl3
NS            30
DS            2
SWH           8223.685 Hz
AQ            0.241117 sec
RG            3.9845387 sec
FIDRES        128
AQ            60.800 usec
DE            6.50 usec
TE            298.2 K
D1            1.00000000 sec
TD0           1
===== CHANNEL f1 =====
NUC1          1H
P1           14.48 usec
PL1          0.00 dB
PL12         11.47932053 W
PL13         400.1324710 MHz
SFO1         400.1324710 MHz
SI           32768
WDW          EM
SSB          0
LB           0.30 Hz
GB           0
PC           1.00
    
```

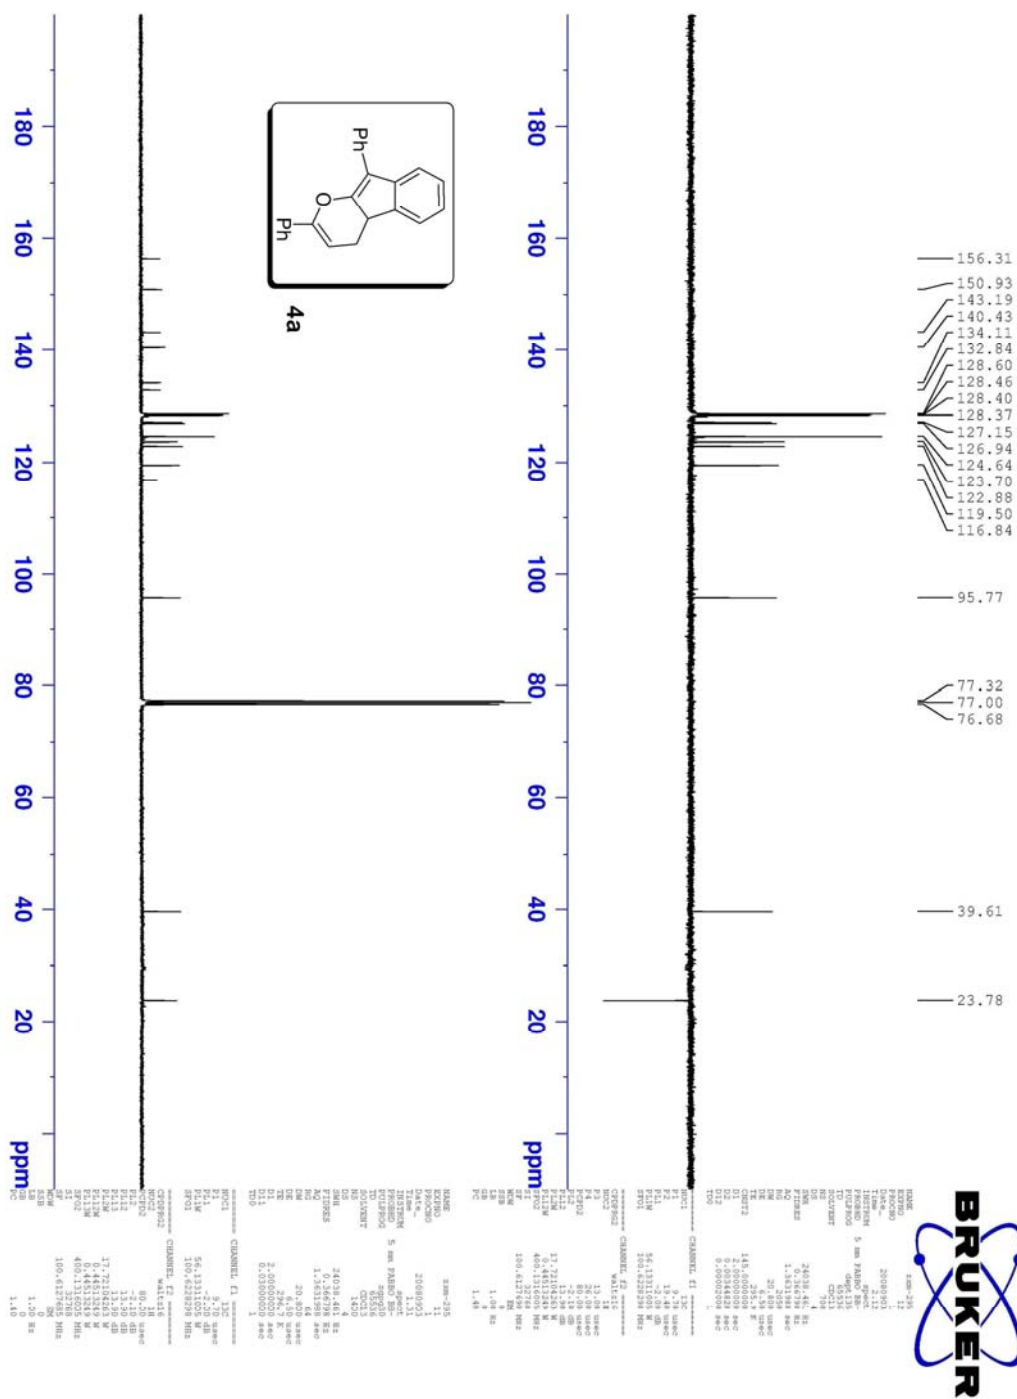

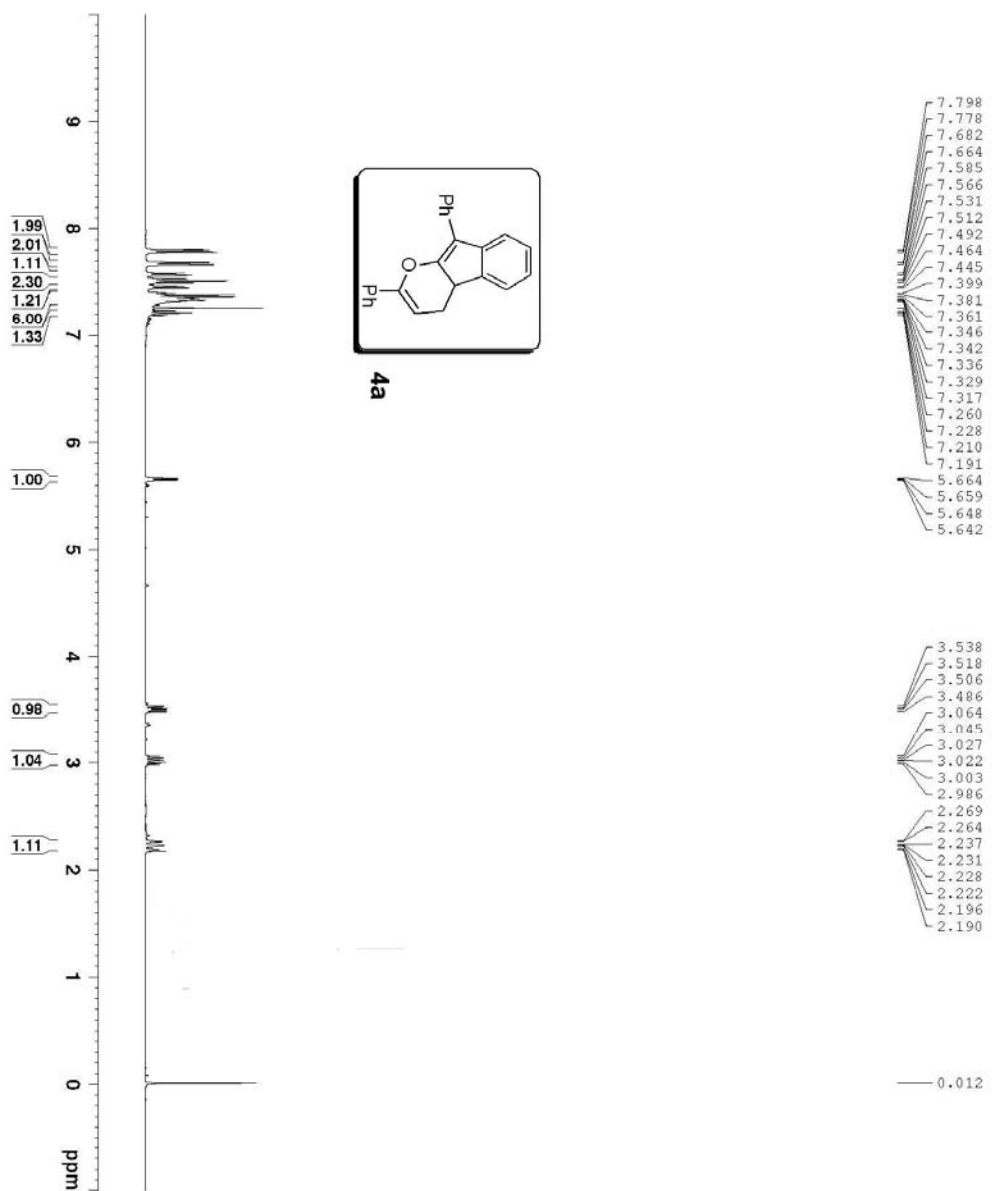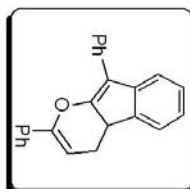

```

NAME          zsm-295
EXPNO         10
PROCNO        20080902
Date_         14.06
Time          14.06
INSTRUM       spect
PROBHD        5 mm PABBO HR-
PULPROG       zgpg30
TD            65536
SOLVENT       CDCl3
NS            40
DS            2
SWH           9223.608 Hz
F2           0.712448 MHz
AQ            3.9844387 sec
RG            203
DW            60.800 usec
DE            3.30 usec
TE            29.30
D1            1.00000000 sec
TDC           1

===== CHANNEL f1 =====
NUC1          13C
P1           14.50 usec
PL1          0.00 dB
PL1W         11.47922053 W
SFO1         400.1324710 MHz
SI           32
MTW          400.1300052 MHz
EM           0
SSB          0
LB           0.30 Hz
GB           0
PC           1.00
    
```

7.798  
7.778  
7.682  
7.664  
7.585  
7.566  
7.531  
7.512  
7.492  
7.464  
7.445  
7.399  
7.381  
7.361  
7.346  
7.342  
7.336  
7.329  
7.317  
7.260  
7.228  
7.210  
7.191  
5.664  
5.659  
5.648  
5.642

3.538  
3.518  
3.506  
3.486  
3.064  
3.045  
3.027  
3.022  
3.003  
2.986  
2.269  
2.264  
2.237  
2.231  
2.228  
2.222  
2.196  
2.190

0.012

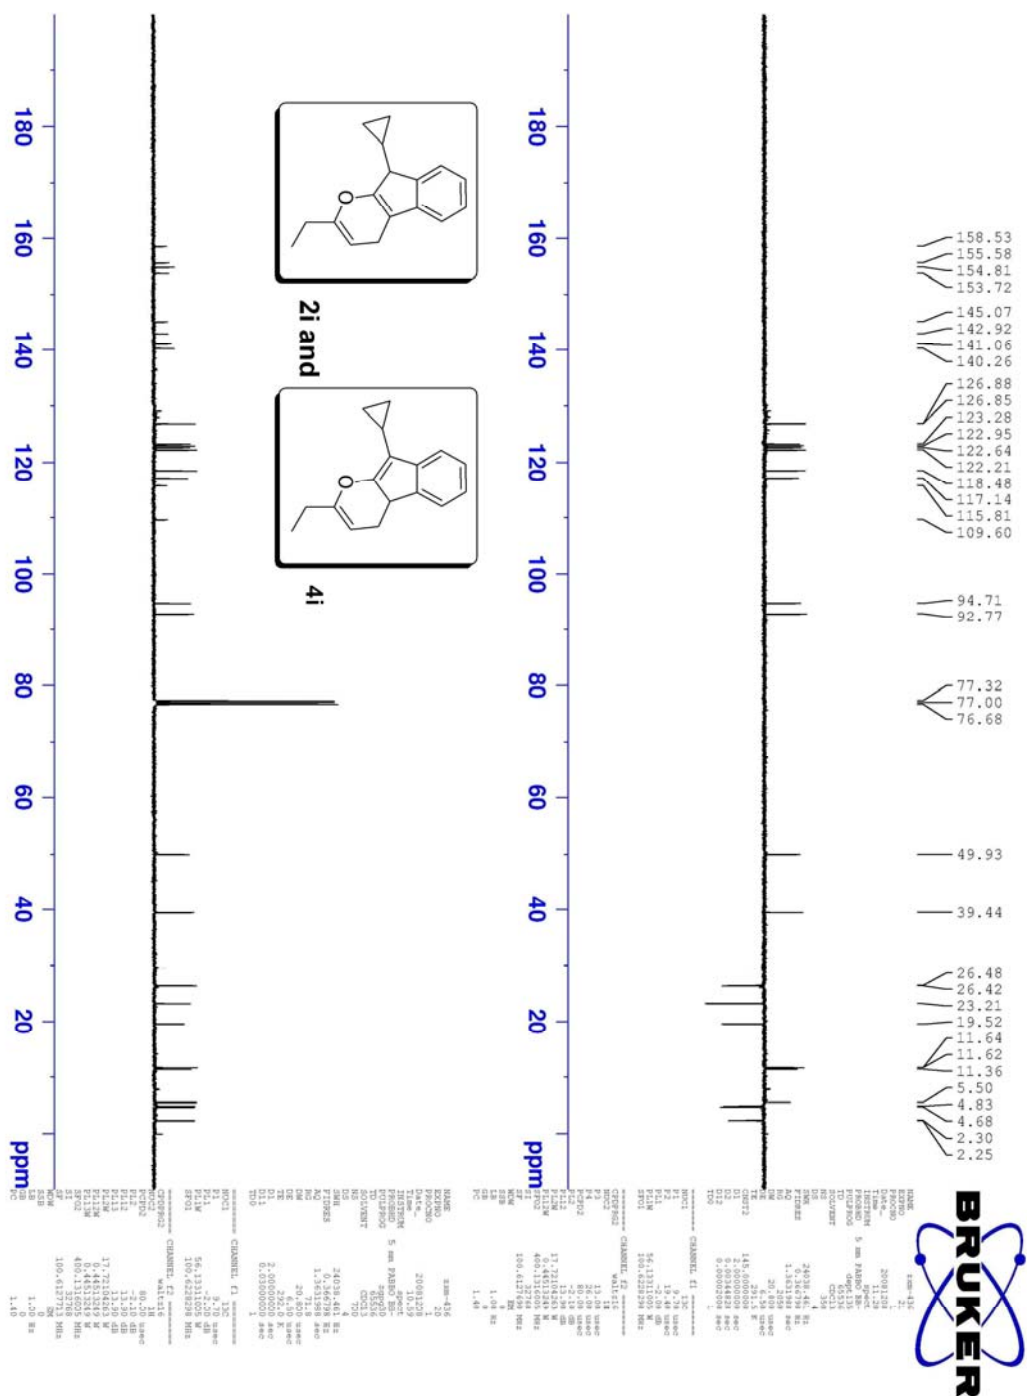

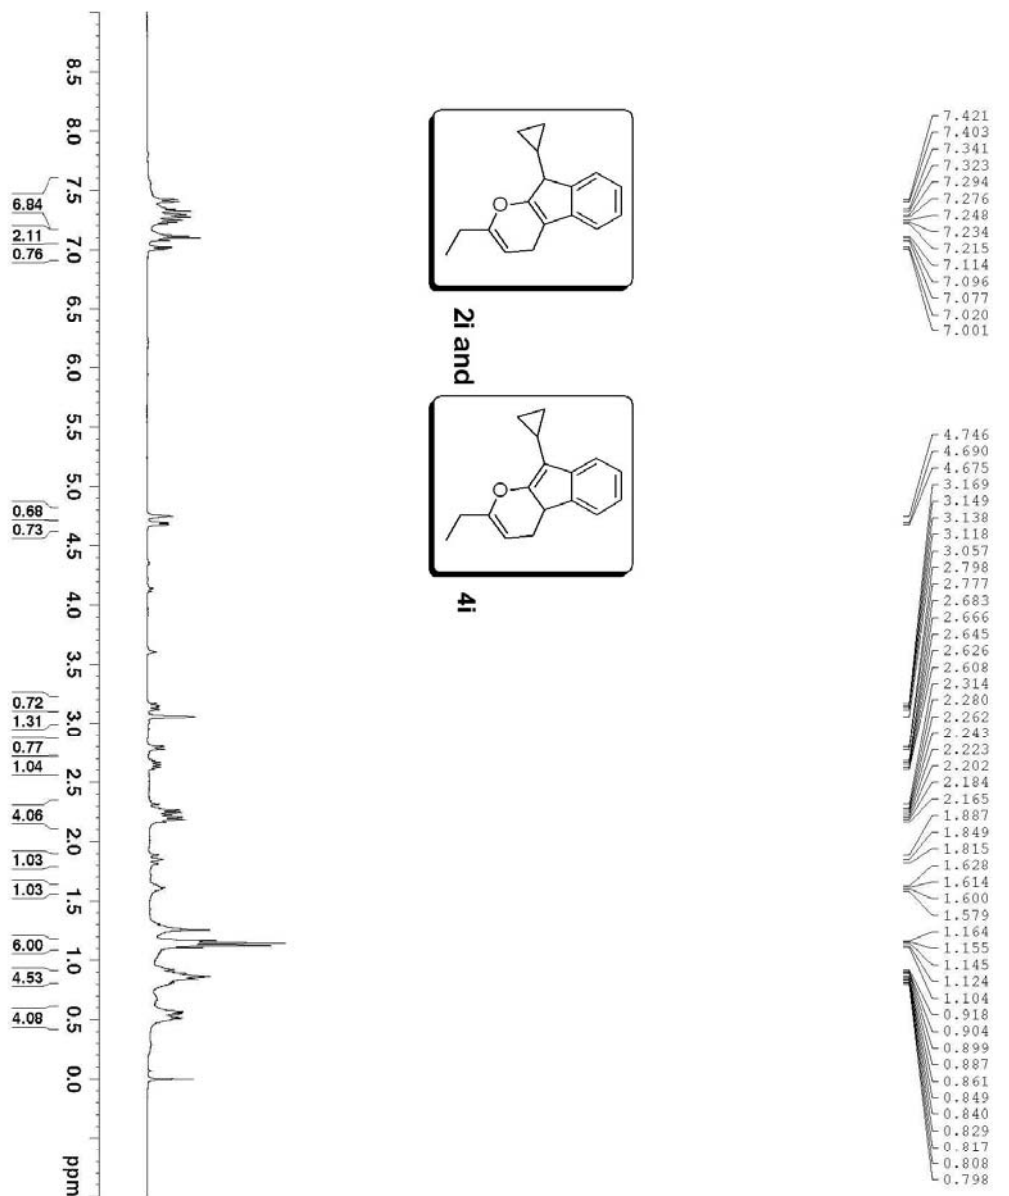

```

NAME          znm-436
EXPNO        1
PROCNO       1
Date_         20081208
Time         9:47
F2 - F1DM    8-Peak
PROBHD       5 mm PABBO
PULPROG      zg30
TD           65536
SOLVENT      CDCl3
NS           16
DS           16
SWH          8273.685 Hz
FIDRES       0.125483 Hz
AQ           3.9846387 sec
RG           900.5
DE           60.800 usec
TE           290.6 K
D1           1.000000000 sec
TD0          1

===== CHANNEL f1 =====
NUC1         1H
P1           14.70 usec
PL1         -1.00 dB
ELI1        13.76539801 W
SFO1        400.1330901 MHz
SI          32768
SF          400.1300099 MHz
WDW          EM
SSB          0
GB          0
PC          1.00
    
```

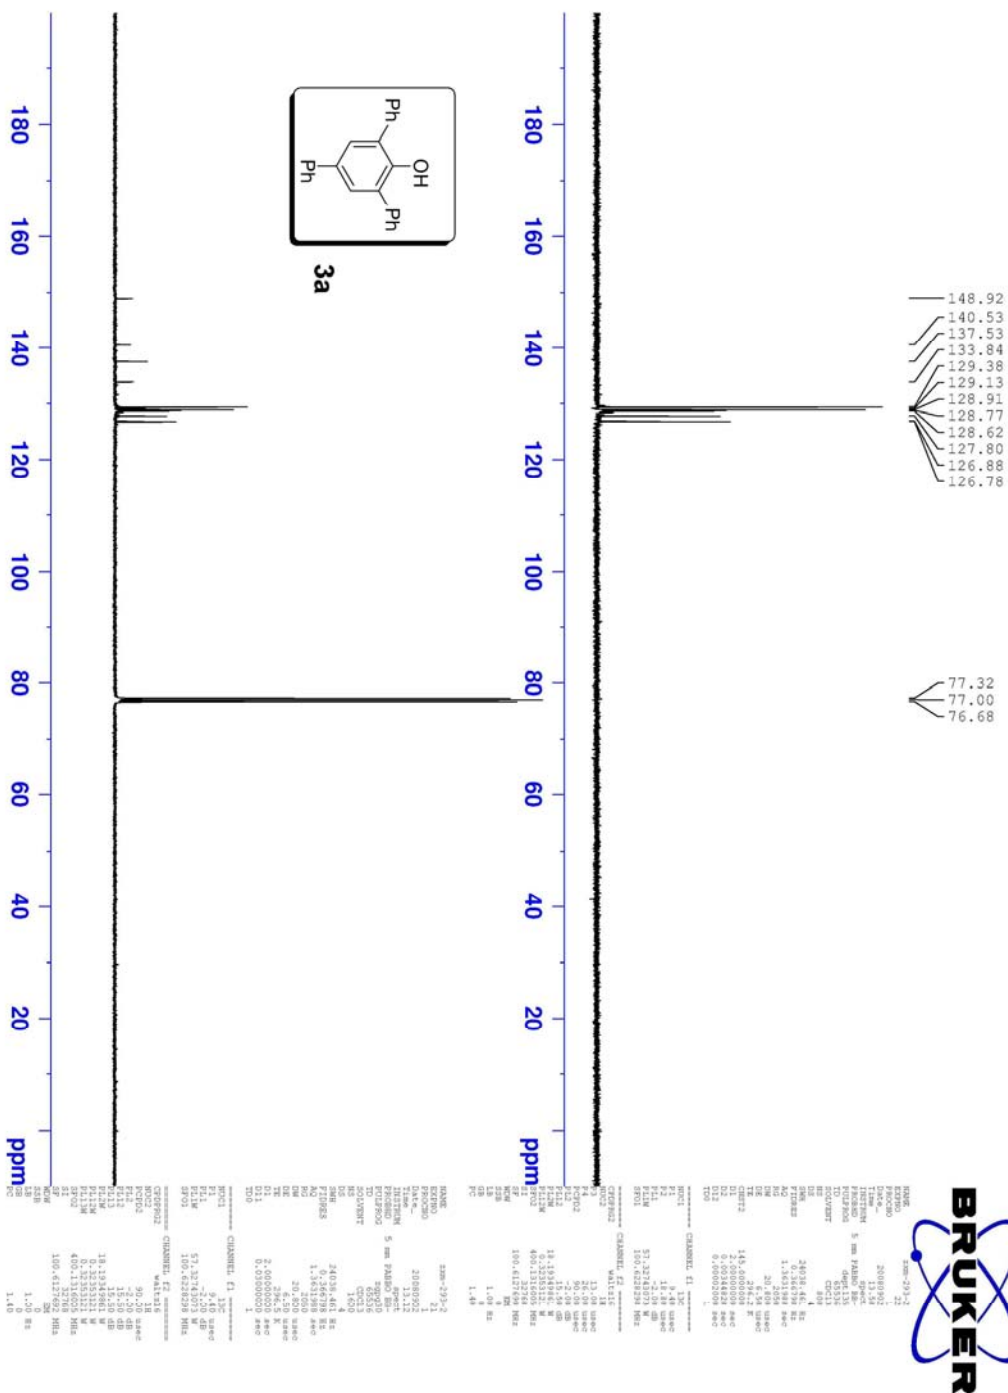



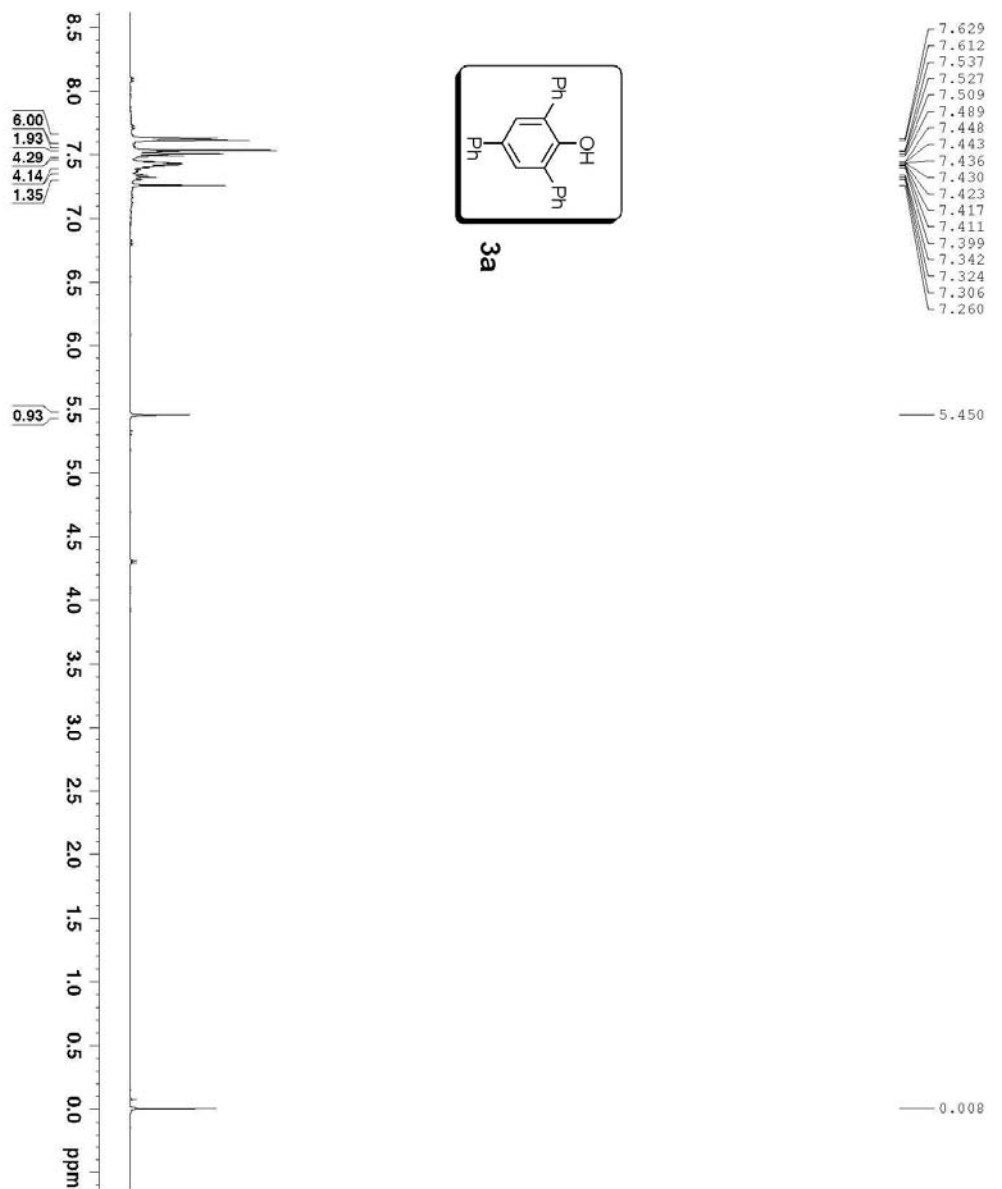

```

NAME                zsm-233-2
EXPNO                20
PROCNO               1
Date_                20080802
Time                 11:36
INSTRUM              spect
PROBHD               5 mm PALBO BB-
PULPROG              zgpg30
SOLVENT              CDCl3
NS                   50
DS                   2
SWH                  8223.485 Hz
FIDRES              0.224483 Hz
AQ                  3.984287 sec
RG                   60.800 usec
DE                   6.50 usec
TE                   294.4 K
TD                   1.0000000
T100                 1 sec

===== CHANNEL f1 =====
NUC1                 1H
P1                   14.00 usec
PL1                  0.00 dB
PL1W                 11.8792053 W
SFO1                 400.1324710 MHz
SI                   32768
SF                   400.1300048 MHz
WDW                   EM
SSB                   0
LB                   0.30 Hz
GB                   0
PC                   1.00
    
```

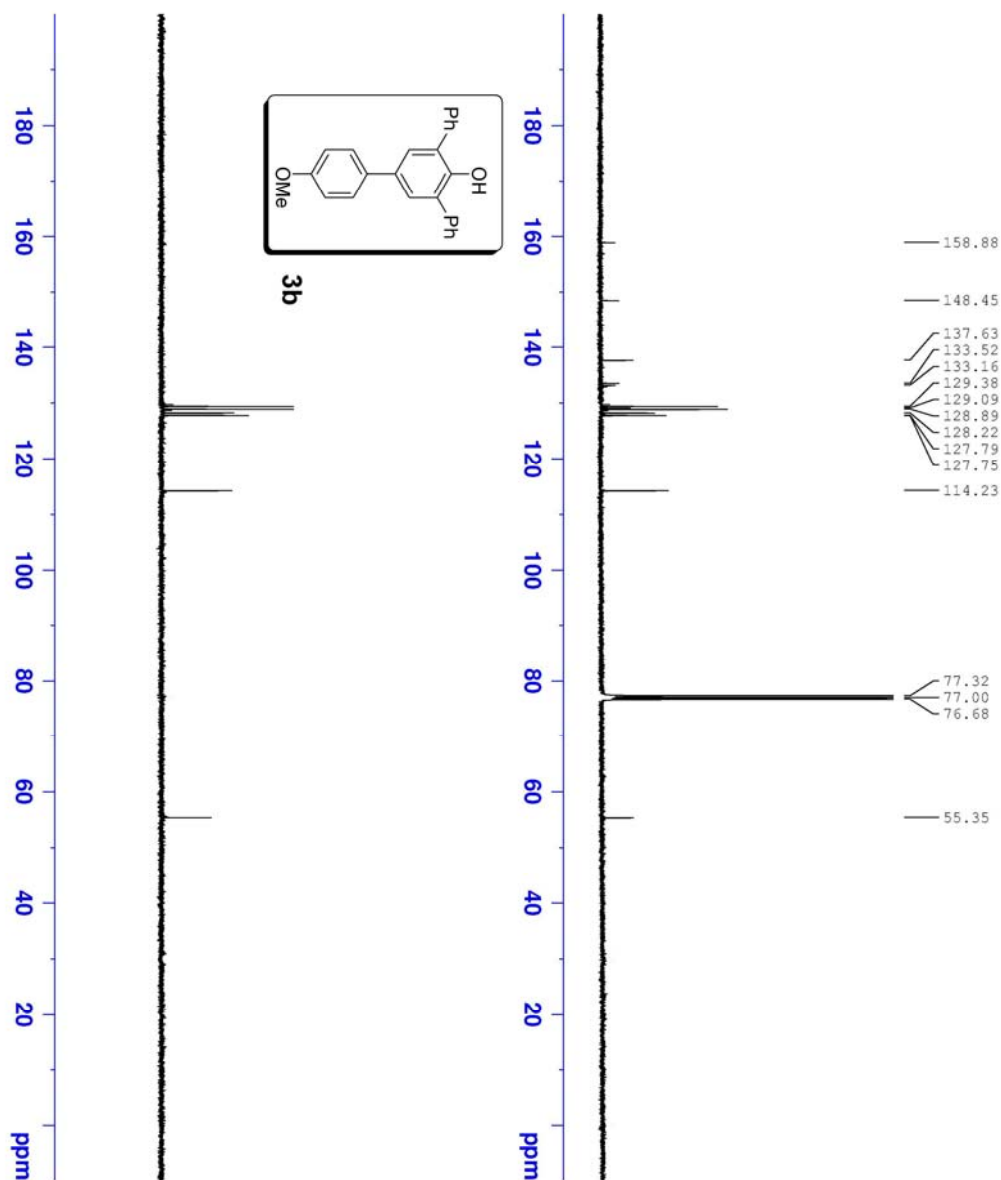

**BRUKER**

NAME: 3b-13C  
PROCNO: 20121001  
Date\_ : 12/18/08  
Time : 11:08  
PROBHD: 5 mm PABBO-1H  
PULPROG: zgpg30  
TD: 65536  
SOLVENT: CDCl3  
INSTRUM: spect  
F2: 125.761 MHz  
F1: 500.131 MHz  
AQ: 4.00000000 sec  
RG: 4096  
WDW: EM  
SSB: 0  
LB: 1.00 Hz  
GB: 0  
PC: 1.40

NAME: 3b-13C  
PROCNO: 20121001  
Date\_ : 12/18/08  
Time : 11:08  
PROBHD: 5 mm PABBO-1H  
PULPROG: zgpg30  
TD: 65536  
SOLVENT: CDCl3  
INSTRUM: spect  
F2: 125.761 MHz  
F1: 500.131 MHz  
AQ: 4.00000000 sec  
RG: 4096  
WDW: EM  
SSB: 0  
LB: 1.00 Hz  
GB: 0  
PC: 1.40

NAME: 3b-13C  
PROCNO: 20121001  
Date\_ : 12/18/08  
Time : 11:08  
PROBHD: 5 mm PABBO-1H  
PULPROG: zgpg30  
TD: 65536  
SOLVENT: CDCl3  
INSTRUM: spect  
F2: 125.761 MHz  
F1: 500.131 MHz  
AQ: 4.00000000 sec  
RG: 4096  
WDW: EM  
SSB: 0  
LB: 1.00 Hz  
GB: 0  
PC: 1.40

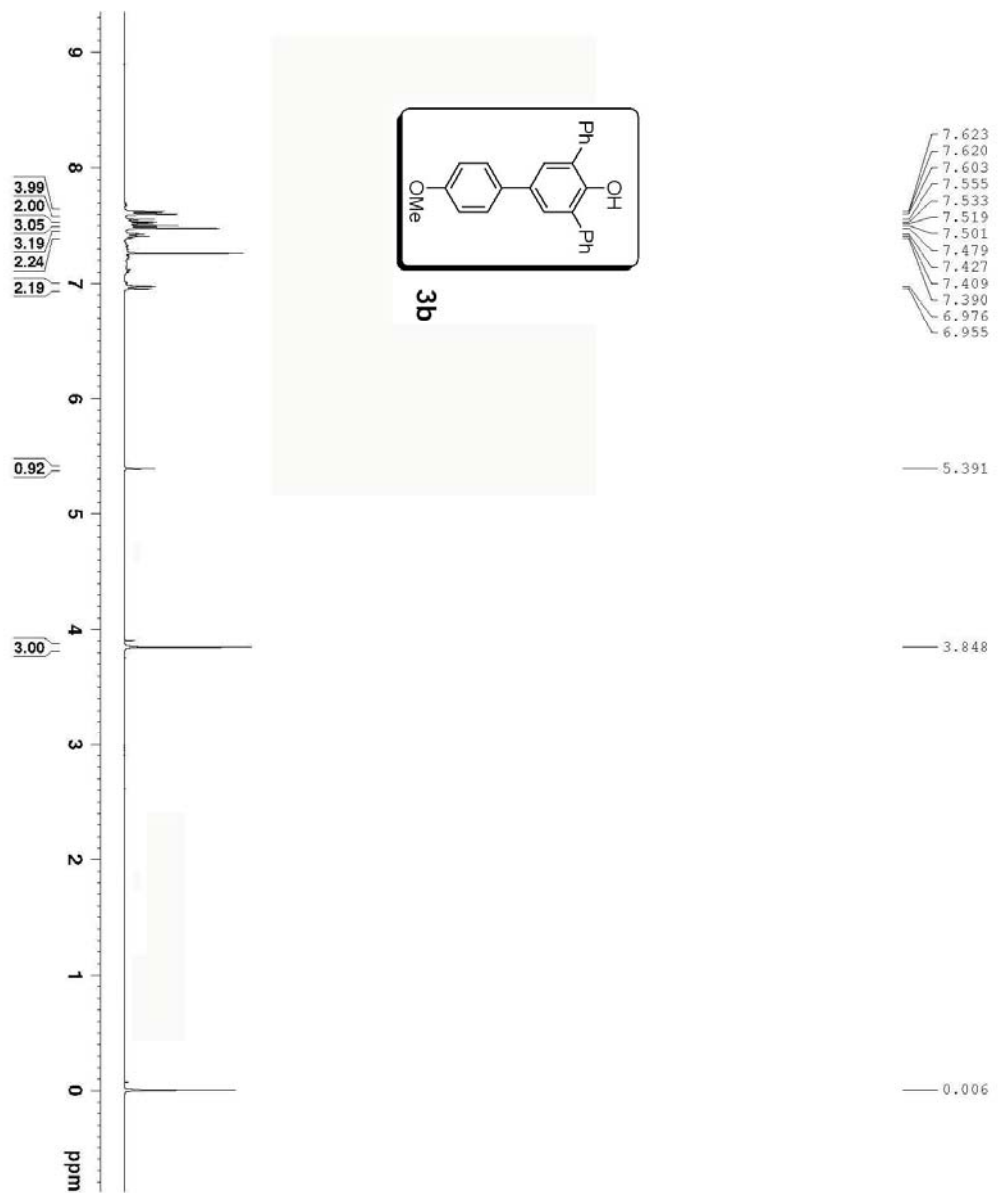

```

NAME          zxm-317
EXPNO         10
PROCNO        20080914
Date_         15.18
Time          15.18
INSTRUM      5 mm PABBO BB-
PROBHD       spect
PULPROG      zgpg30
TD           65536
SOLVENT      CDCl3
NS           56
DS           2
SWH           8223.485 Hz
F2          0.22348517 MHz
NUC1          13C
NUC2          13C
SOLVENTS     0
AQ           3.9845387 sec
RG           322
AQ           60.800 usec
DE           5.50 usec
DI           0.30 Hz
DE           1.00000000 sec
TD0          1
===== CHANNEL f1 =====
NUC1          13C
P1           14.70 usec
PL1          -1.00 dB
P1LW         13.75590801 W
SFO1         400.1324710 MHz
SI           32768
WDW          RM
SSB           0
LB           0.30 Hz
GB           0
PC           1.00
    
```

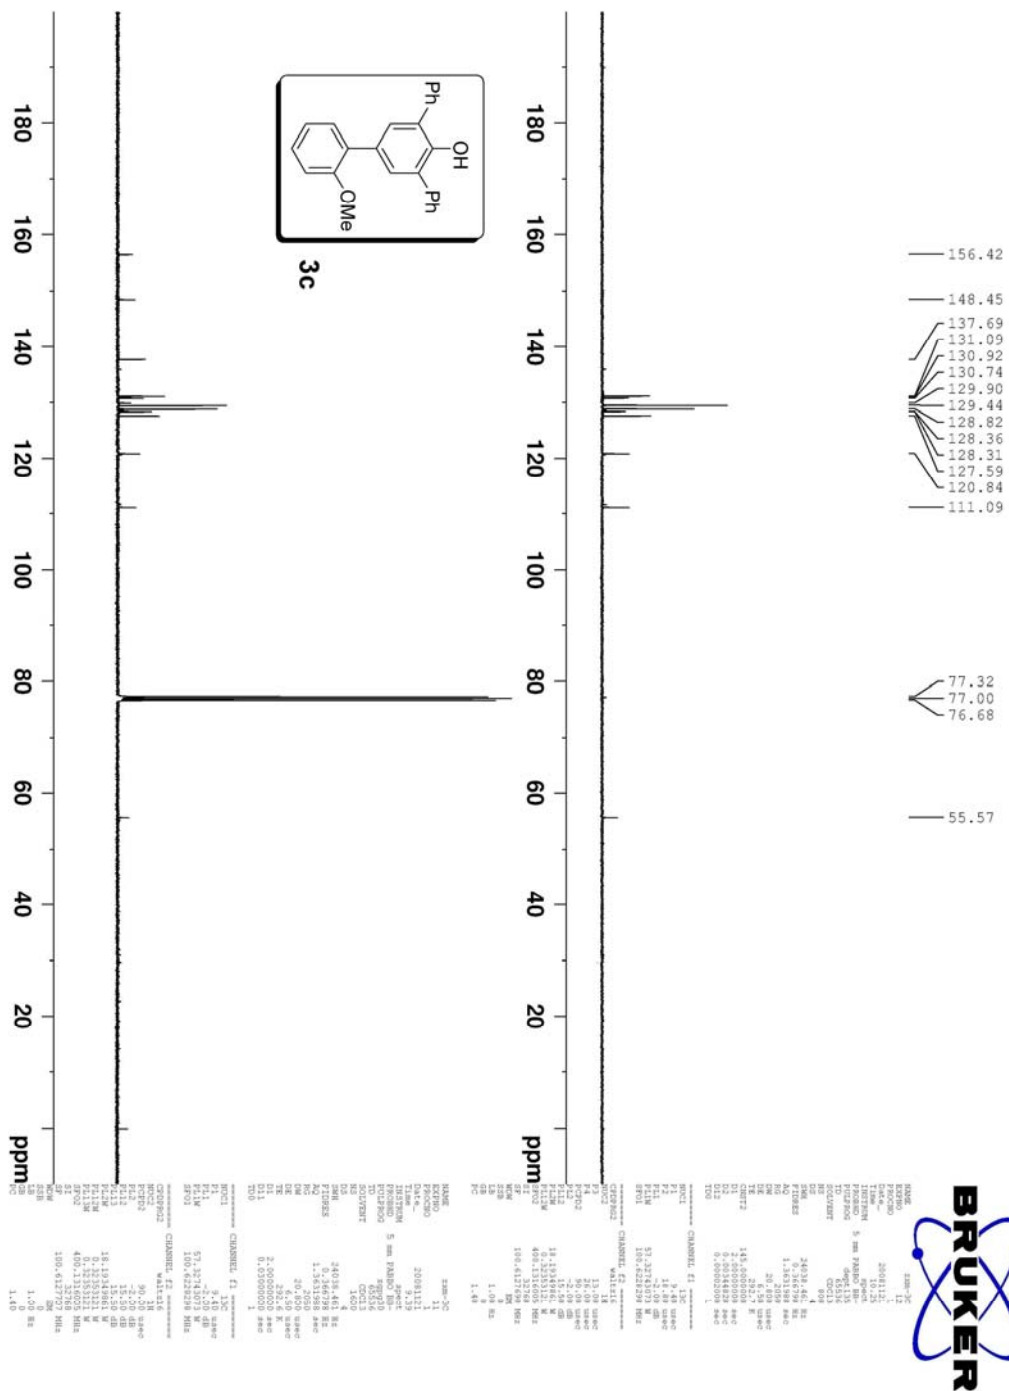

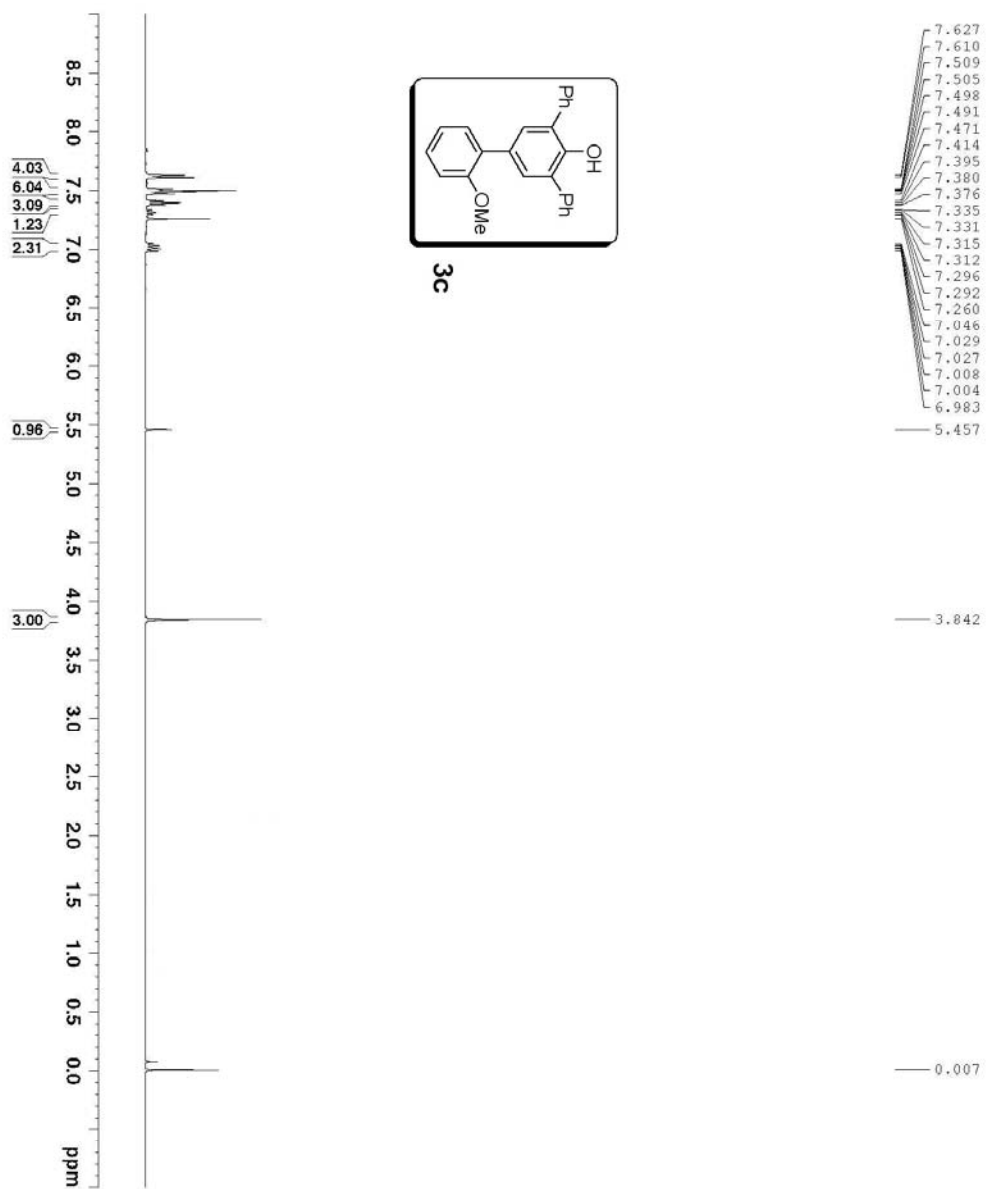

```

NAME          zsm-3c
EXPNO         10
PROCNO        1
Date_         20081121
Time          8.06
INSTRUM       spect
PROBHD        5 mm PABBO-BB-
PULPROG       zg30
TD            65536
SOLVENT       CDCl3
NS           10
DS           2
SWH           8223.685 Hz
FIDRES        0.125483 Hz
AQ           3.984537 sec
RG           655
DE           60.800 usec
TE           293.2 K
D1           1.00000000 sec
D10          1
===== CHANNEL f1 =====
NUC1          1H
P1           14.60 usec
PL1          0.00 dB
PL12         11.4793063 dB
PL1W         400.1324710 MHz
SFO1         400.1324710 MHz
SI           32768
SF           400.1300054 MHz
KRM          EX
RGSM         65536
LB           0.30 Hz
GB           0
PC           1.00
    
```

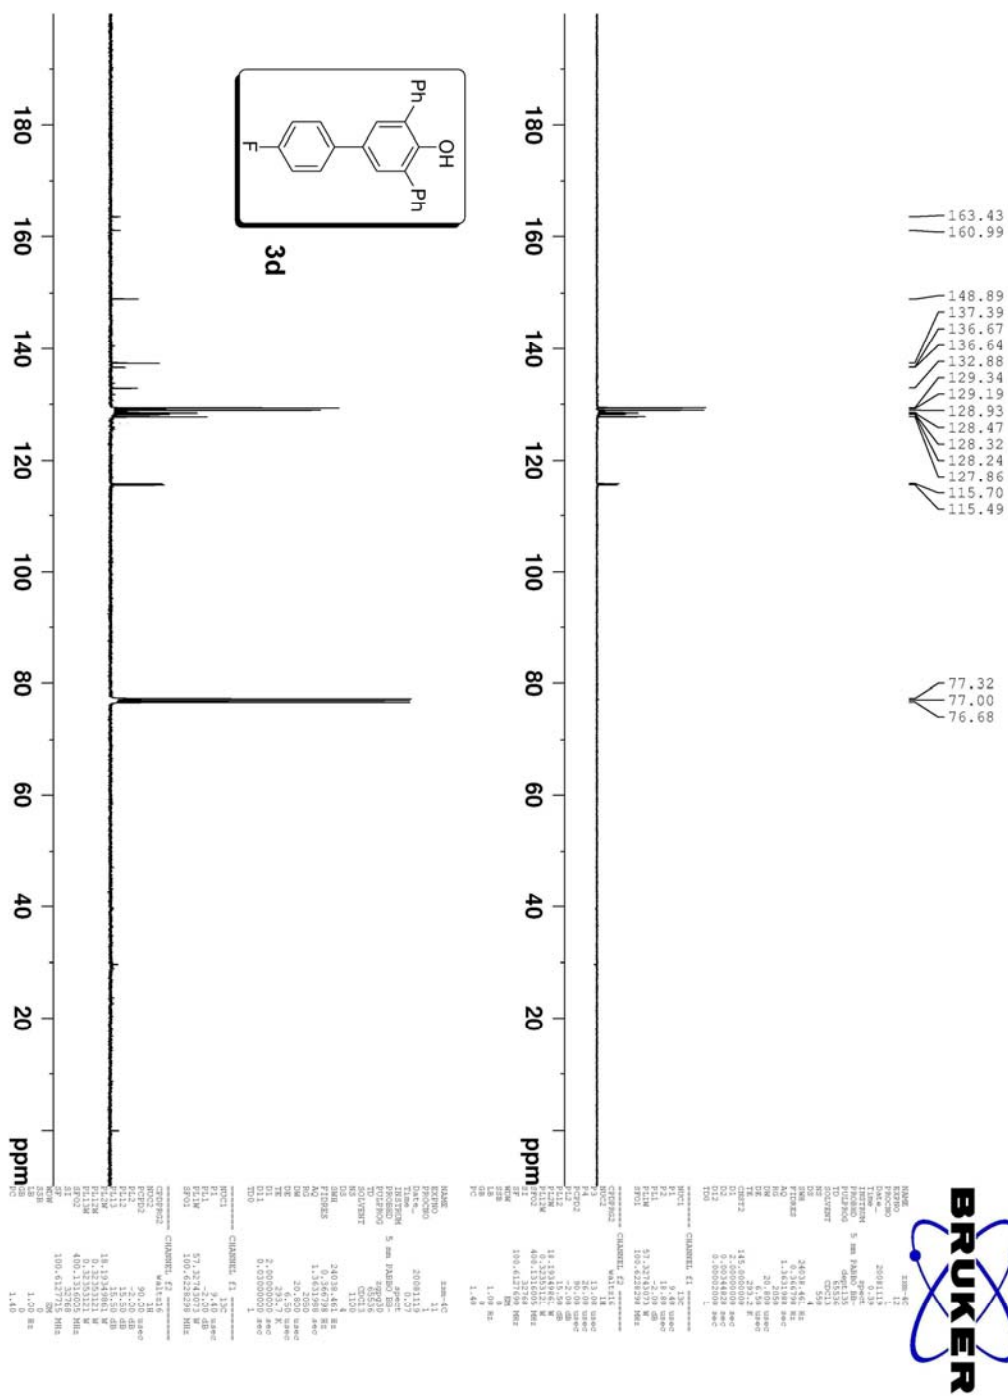

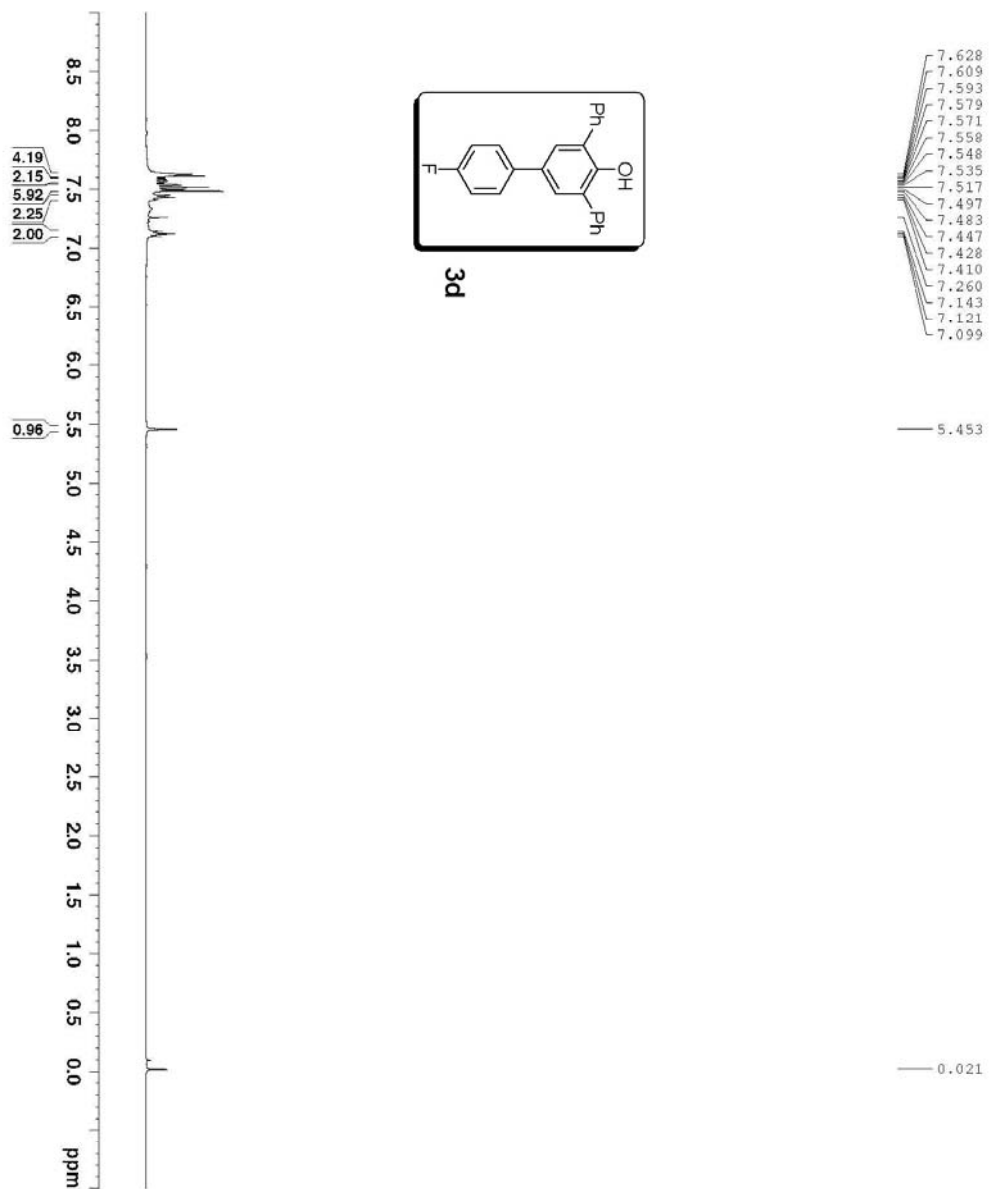

```

NAME                zxm-4c
EXPNO                10
PROCNO              2009118
Date_              201118
Time                11.47
INSTRUM             spect
PROBHD              5 mm PABBO BB-
PULPROG             zgpg30
TD                  65536
SFO1                 400.132410
AQ                   0.125483
RG                   3.984281
DE                   60.800
TE                   293.3
DQ                   6.50
PC                   1.00000000
===== CHANNEL f1 =====
NUC1                 1H
P1                   14.00
PL1                  0.000000
PL1W                 11.4792053
SFO1                 400.132410
SI                   32788
SE                   400.1300024
NUC2                 13C
PL2                   0.000000
PL2W                 0.30
SSB                  0
GB                   1.00
    
```

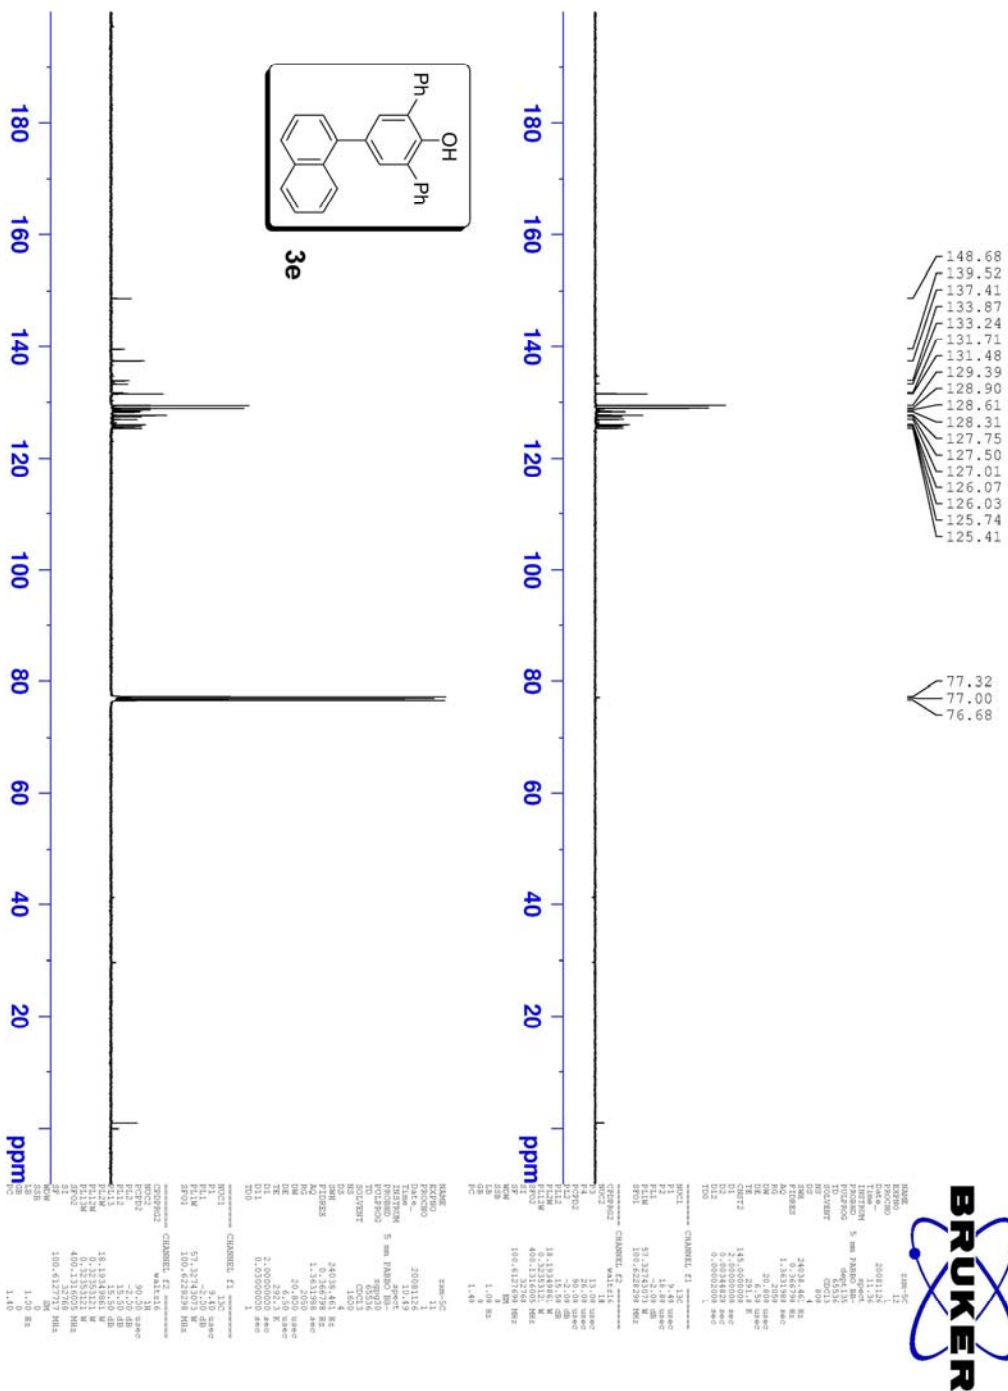



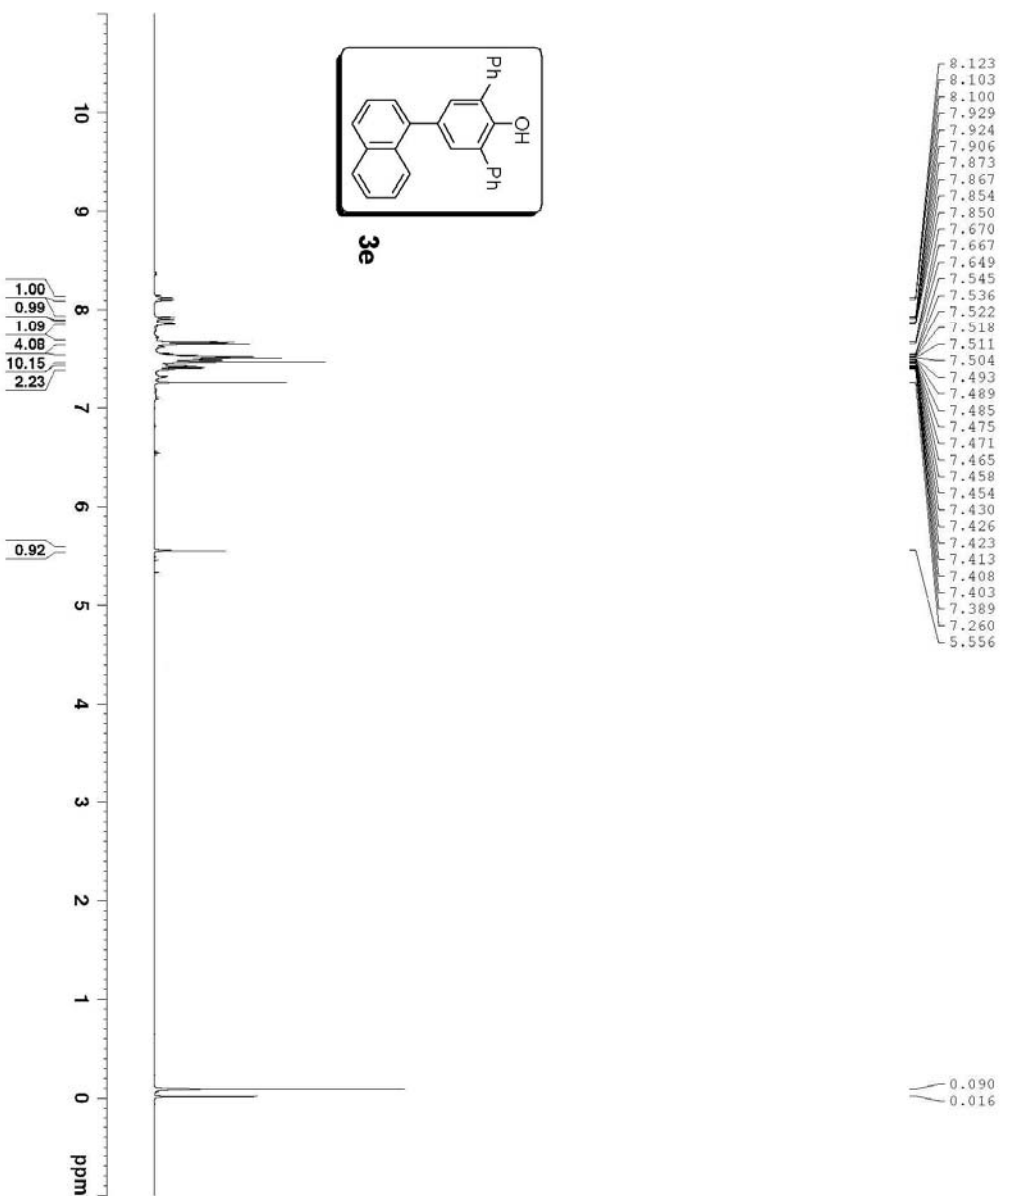

```

NAME          zsm-5C
EXPNO         1
PROCNO        1
Date_         20081126
Time          9.07
INSTRUM       spect
PROBHD        5 mm PABBO
PULPROG       zgpg30
TD            65536
SOLVENT       CDCl3
NS            40
DS            4
SWH           8223.685 Hz
FIDRES        0.125483 Hz
AQ            3.9845387 sec
RG            60.203 usec
DM            6.00 usec
DE            232.2 K
TE            1.00000000 sec
D1            1
TD0           1

===== CHANNEL f1 =====
NUC1          1H
P1            14.50 usec
PL1           0.00 dB
PL1W          11.47932053 W
SFO1          400.132768 MHz
SF            400.1300052 MHz
WDW           EM
SSB           0
GB            0.30 Hz
DS            1.00
PC            1.00
    
```

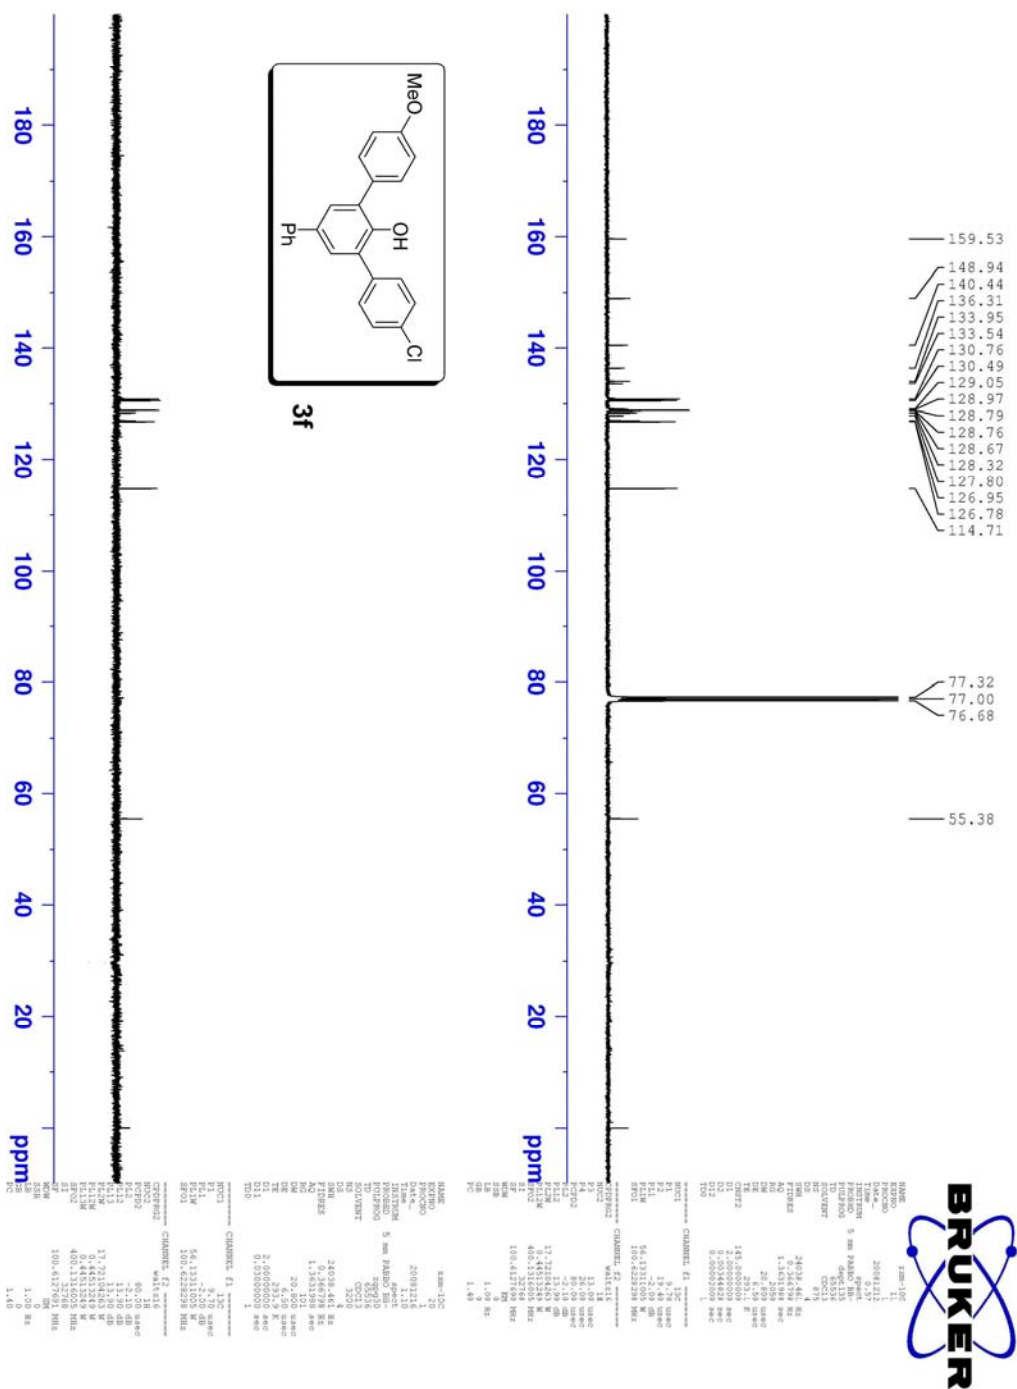

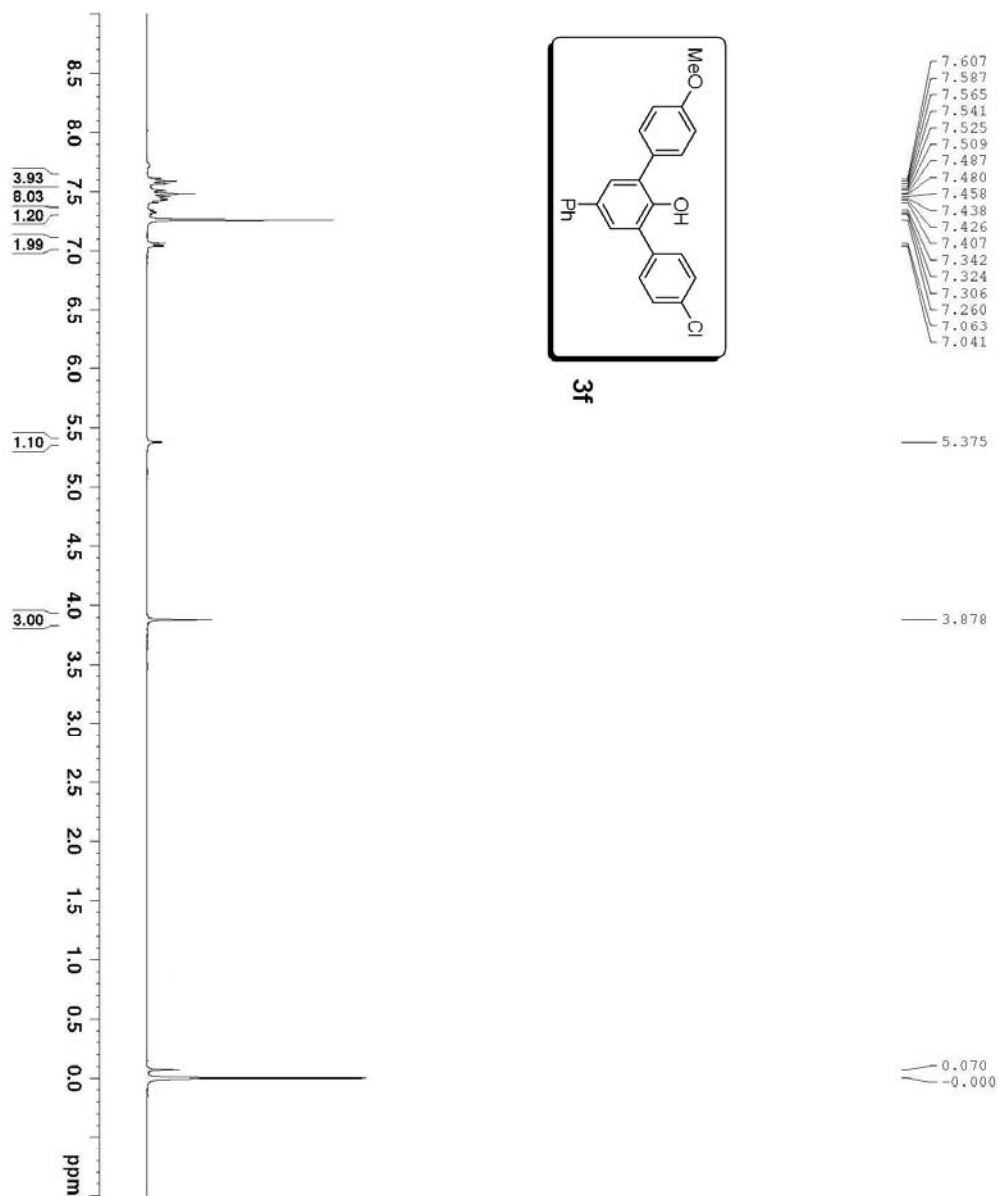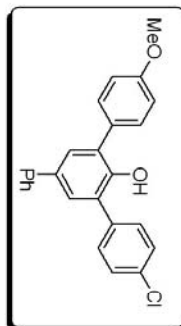

**3f**

```

===== CHANNEL f1 =====
NAME          zxm-10c
EXPNO         10
PROCNO        20081211
Date_         10.17
Time          10.17
INSTRUM       5 mm PABBO BR-
PROBHD        spect
PULPROG       zgpg30
TD            65536
SOLVENT       CDCl3
NS            50
DS            2
SWH           8233.685 Hz
FIDRES        0.2111 Hz
AQ            3.9845387 sec
RG            645
DW            60.800 usec
DE            6.50 usec
TE            300.2 K
D1            1.00000000 sec
TD0           1

===== CHANNEL f1 =====
NUC1          13C
P1            14.48 usec
PL1          0.00 dB
PL1W         11.47932053 W
SFO1         400.1324710 MHz
SI           32758
WDW          EM
SSB          0
LB           0.30 Hz
GB           0
PC           1.00
    
```



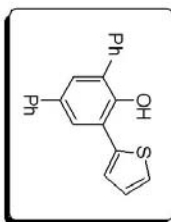

**3g**

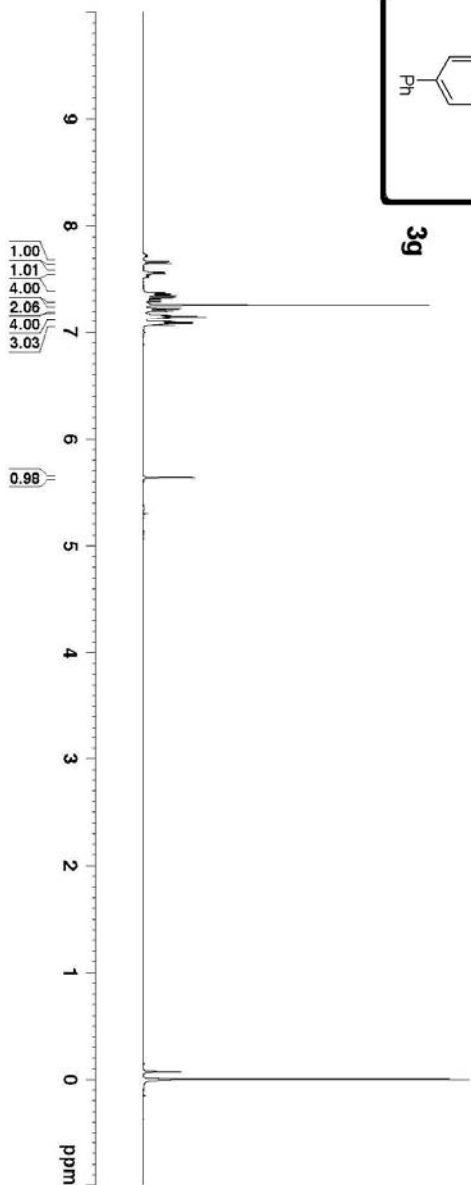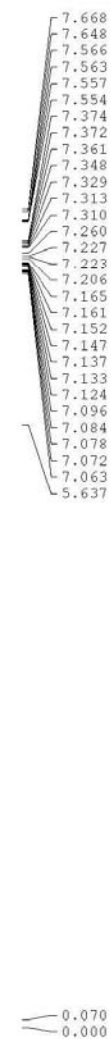

```

NAME          zsm-11c
EXNO          10
PROCNO       20091219
Date_         12/19
Time          12:19
INSTRUM      spect
PROBHD       5 mm PABBO-BB-
PULPROG      zgpg30
F2          400.130048
F1          400.130048
TD           65536
AQ           6.50
RG           327.68
DS           2
SWH          8223.685 Hz
FIDRES       0.122483 Hz
AQ           3.984817 sec
RG           60.800
DW           6.50 usec
DE           282.2 K
TE           300
T2R1         1.00000000 sec
T20
===== CHANNEL f1 =====
NUC1          1H
P1           14.00 usec
PL1          0.00 dB
PL1W         11.47923053 W
SFO1         400.1324710 MHz
SI           327.68
SF           400.1300048 MHz
WDW          EM
SSB          0
LB           0.30 Hz
GB           0
PC           1.00
    
```

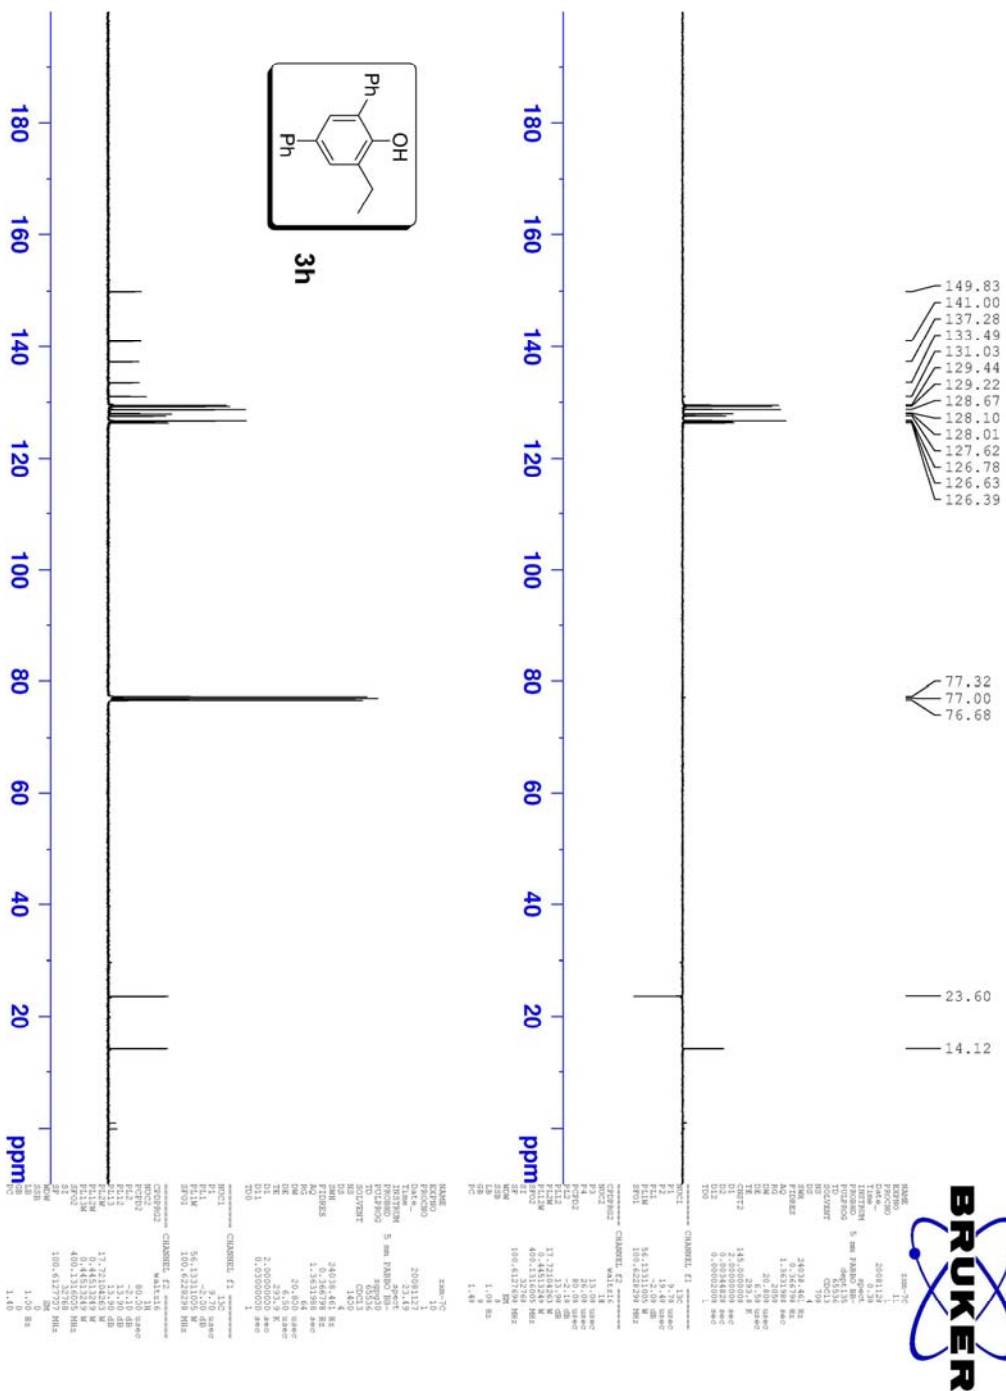

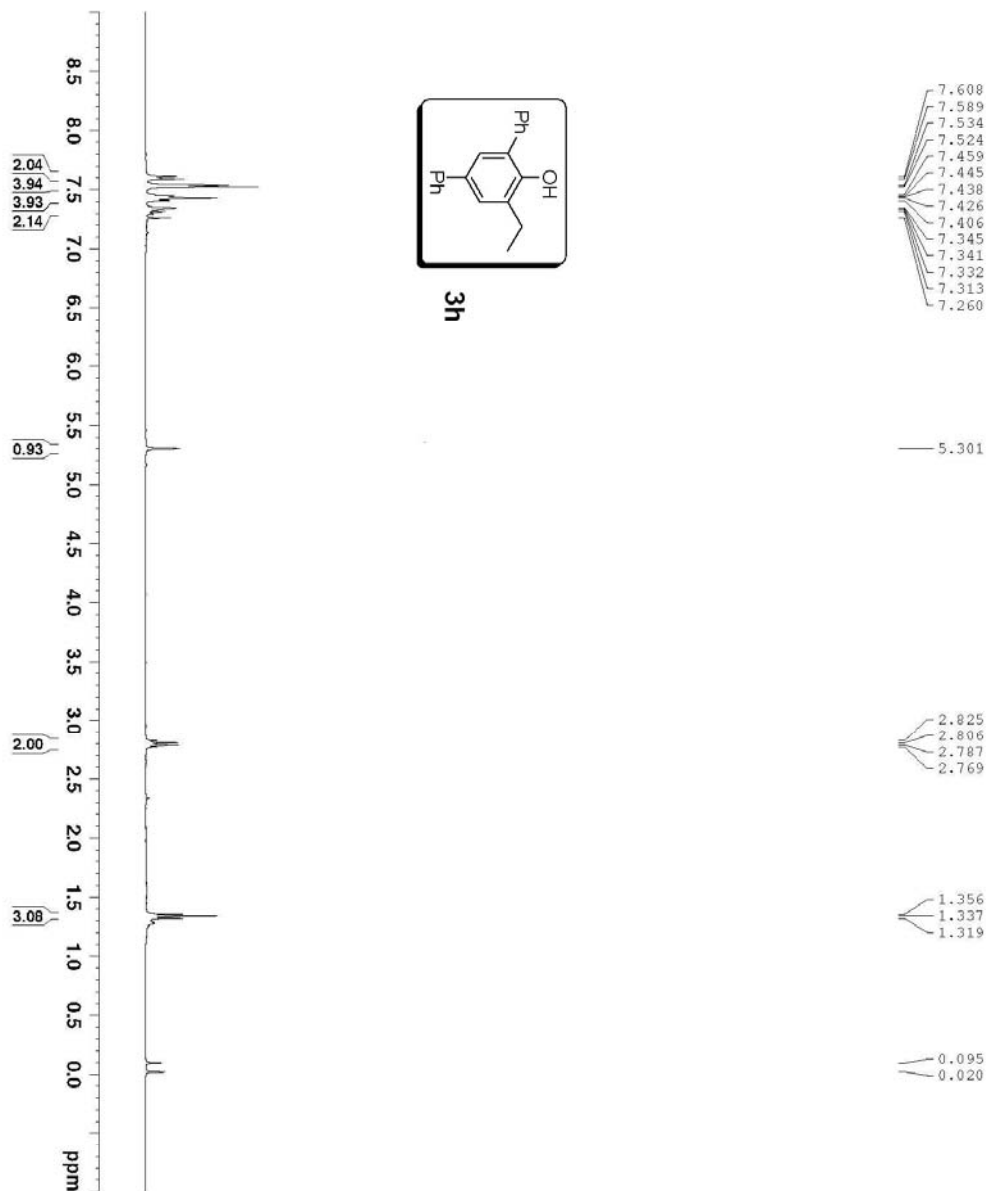

```

NAME          zsm-428
EXNO          10
PROCNO       1
Date_         20081128
Time         13:12
INSTRUM      spect
PROBHD       5 mm PABBO-BB-
PULPROG      zg30
TD           65536
SOLVENT      CDCl3
NS           40
DS           2
SWH          8223.685 Hz
FIDRES       0.125483 Hz
AQ           3.9840128 sec
RG           60.800 usec
DE           6.50 usec
TE           294.0 K
D0           1.00000000 sec
TDO          1
===== CHANNEL f1 =====
NUC1          1H
P1           14.00 usec
PL1          0.00 dB
PL1W         13.75590801 W
SFO1         400.1324710 MHz
SI           32768
SR           400.1300051 MHz
WDW          EM
SSB          0
LB           0.30 Hz
GB           0
EC           1.00
    
```

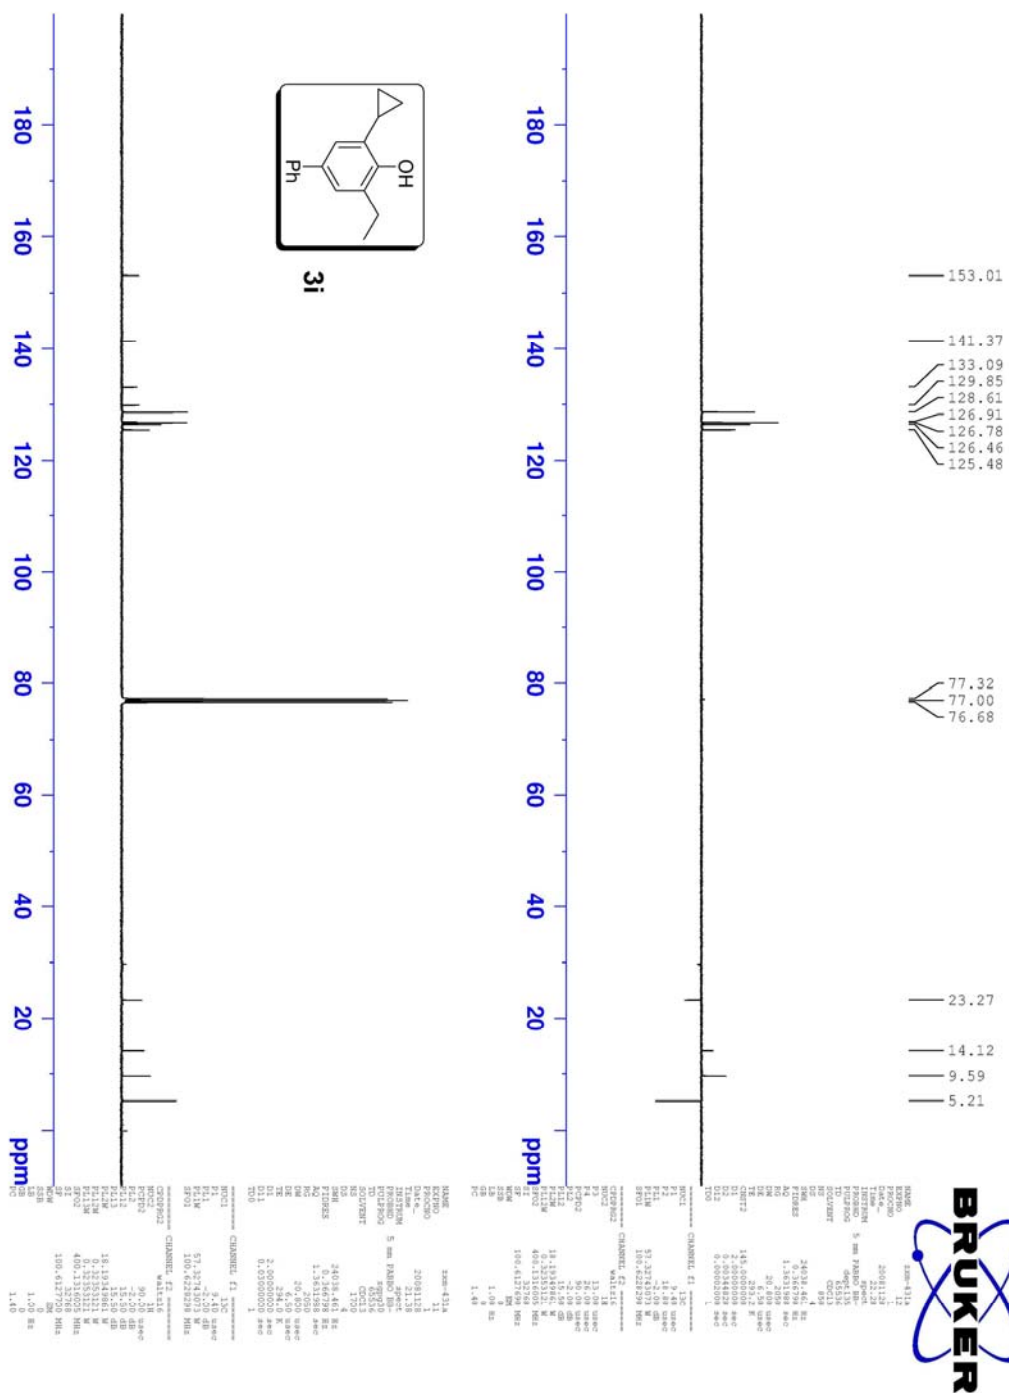



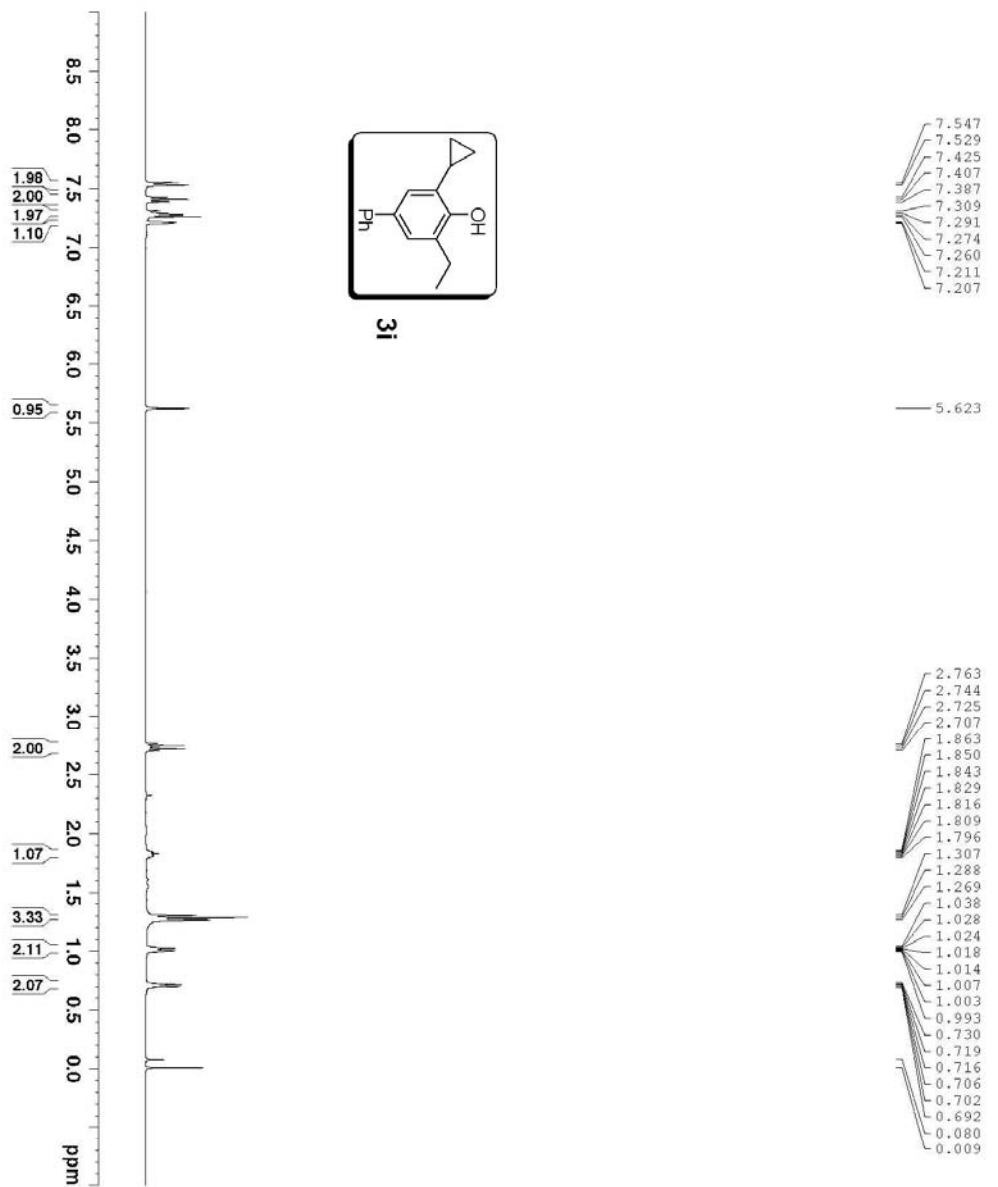

```

NAME          zsm-431a
EXPNO        10
PROCNO       1
Date_         20081128
Time         18:22
INSTRUM      spect
PROBHD       5 mm PABBO-BB-
PULPROG      zg30
TD           65536
SOLVENT      CDCl3
NS           402
DS           2
SWH          8223.685 Hz
FIDRES       0.125483 Hz
AQ           3.9846287 sec
RG           60.800 usec
DE           6.50 usec
TE           283.3 K
D1           1.00000000 sec
D10          1
===== CHANNEL f1 =====
NUC1         1H
P1           14.60 usec
PL1          0.00 dB
PL1W         11.47930653 dB
SFO1         400.1324710 MHz
SI           32768
SF           400.1300052 MHz
SSB          EM
LB           0.30 Hz
GB           0
PC           1.00
    
```

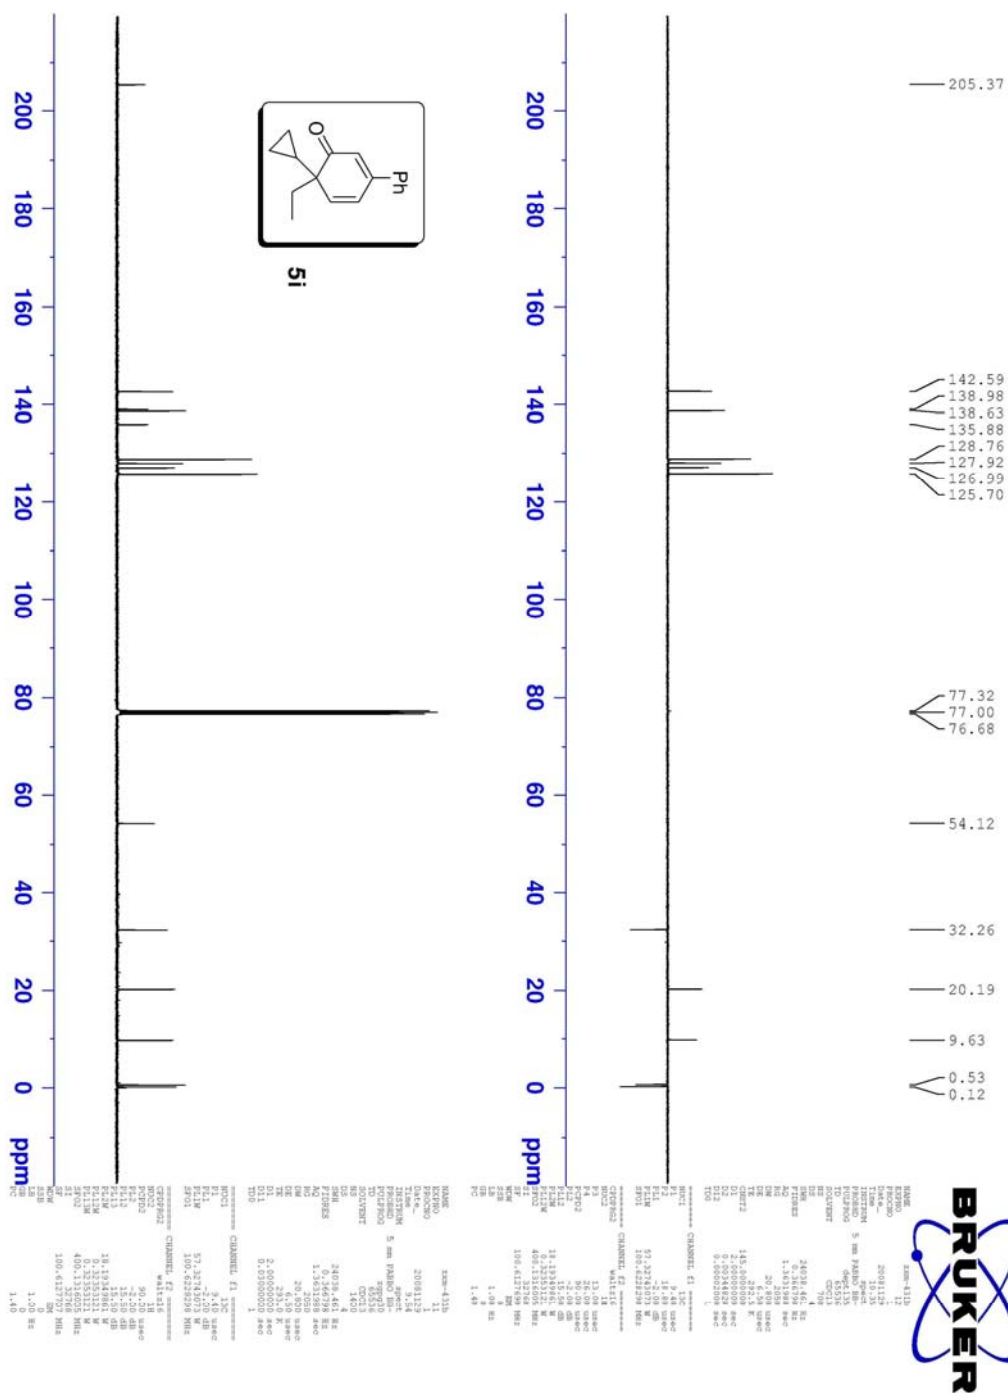

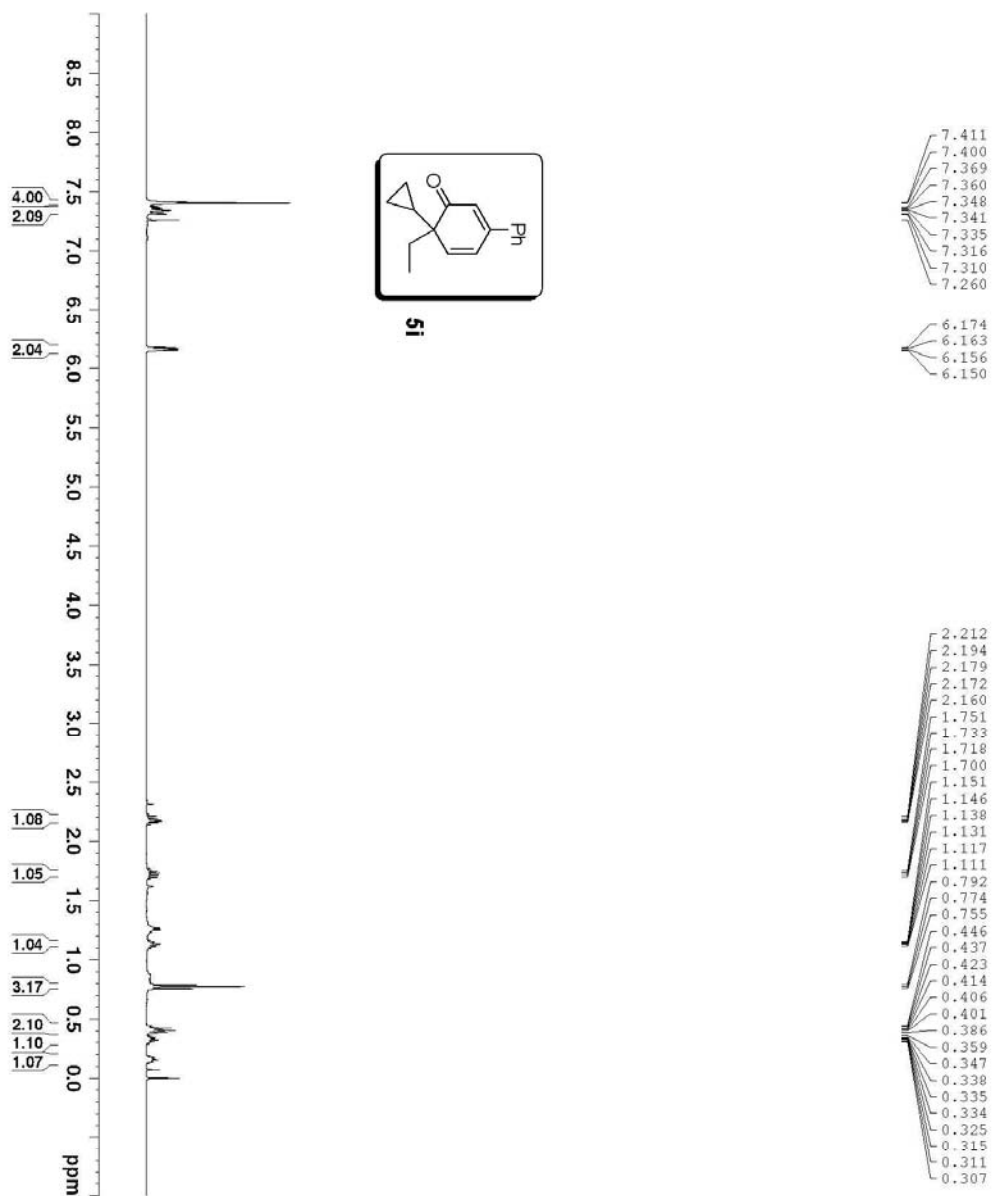

7.411  
 7.400  
 7.369  
 7.360  
 7.348  
 7.341  
 7.335  
 7.316  
 7.310  
 7.260

6.174  
 6.163  
 6.156  
 6.150

2.212  
 2.194  
 2.179  
 2.172  
 2.160  
 1.751  
 1.733  
 1.718  
 1.700  
 1.151  
 1.146  
 1.138  
 1.131  
 1.117  
 1.111  
 0.792  
 0.774  
 0.755  
 0.446  
 0.437  
 0.423  
 0.414  
 0.406  
 0.401  
 0.386  
 0.359  
 0.347  
 0.338  
 0.335  
 0.334  
 0.325  
 0.315  
 0.311  
 0.307

```

NAME          znm-431-a
EXPNO        1
PROCNO       1
Date_        20081202
Time         9.23
INSTRUM      5 mm PABBO
PROBHD       5mm
PULPROG      zgpg30
TD           65536
SOLVENT      CDCl3
NS           40
DS           4
SWH           8223.685 Hz
FIDRES       0.125483 Hz
AQ           3.984587 sec
RG           181
DM           60.800 usec
DE           4.50 usec
TE           292.3 K
D1           1.00000000 sec
TD0          1

===== CHANNEL f1 =====
NUC1          1H
P1           14.50 usec
PL1          0.00 dB
PL1W         11.47932053 W
SFO1         400.132768 MHz
SF           400.1300054 MHz
WDW          EM
SSB          0
DSB          0
GB          0.30 Hz
PC           1.00
    
```

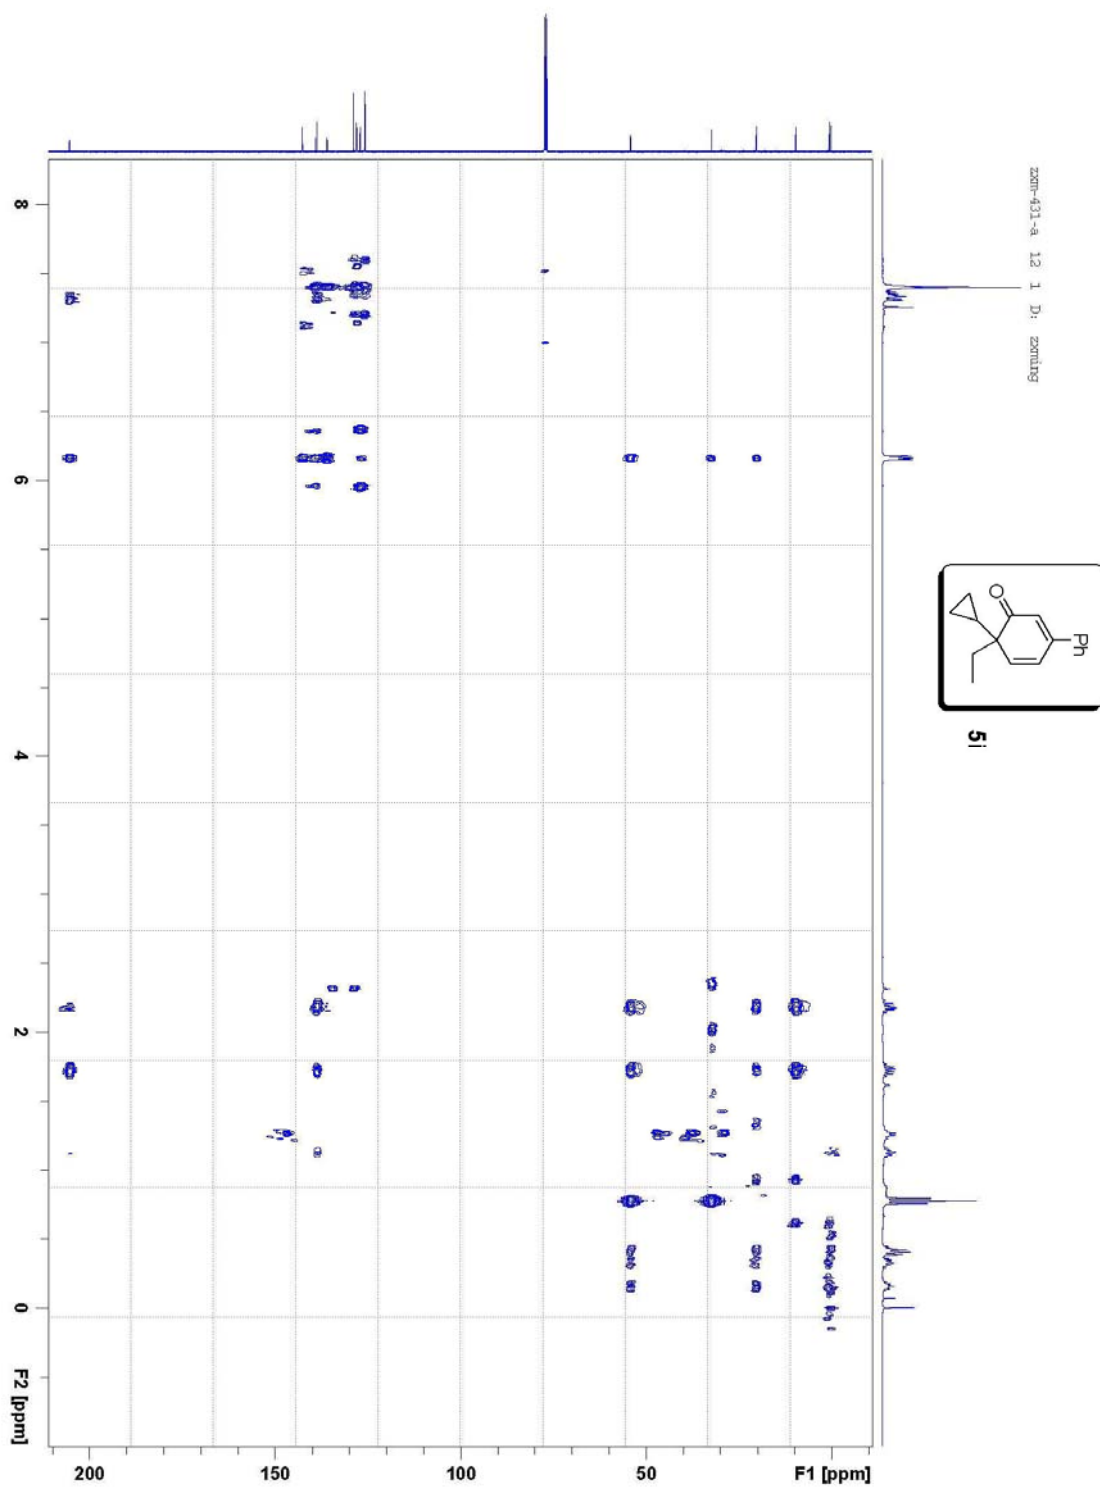

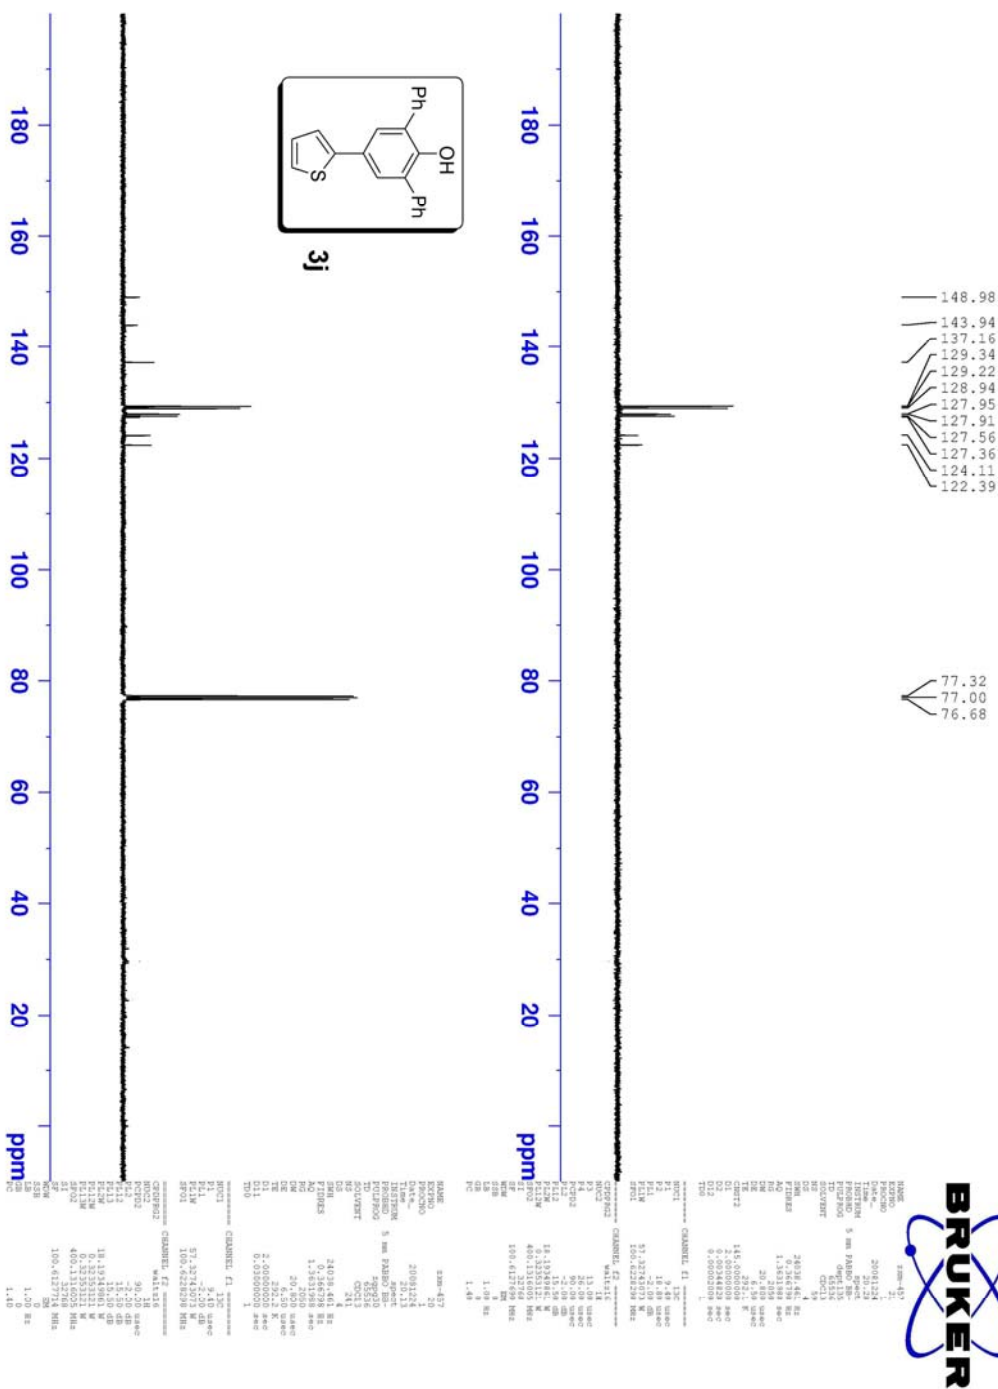

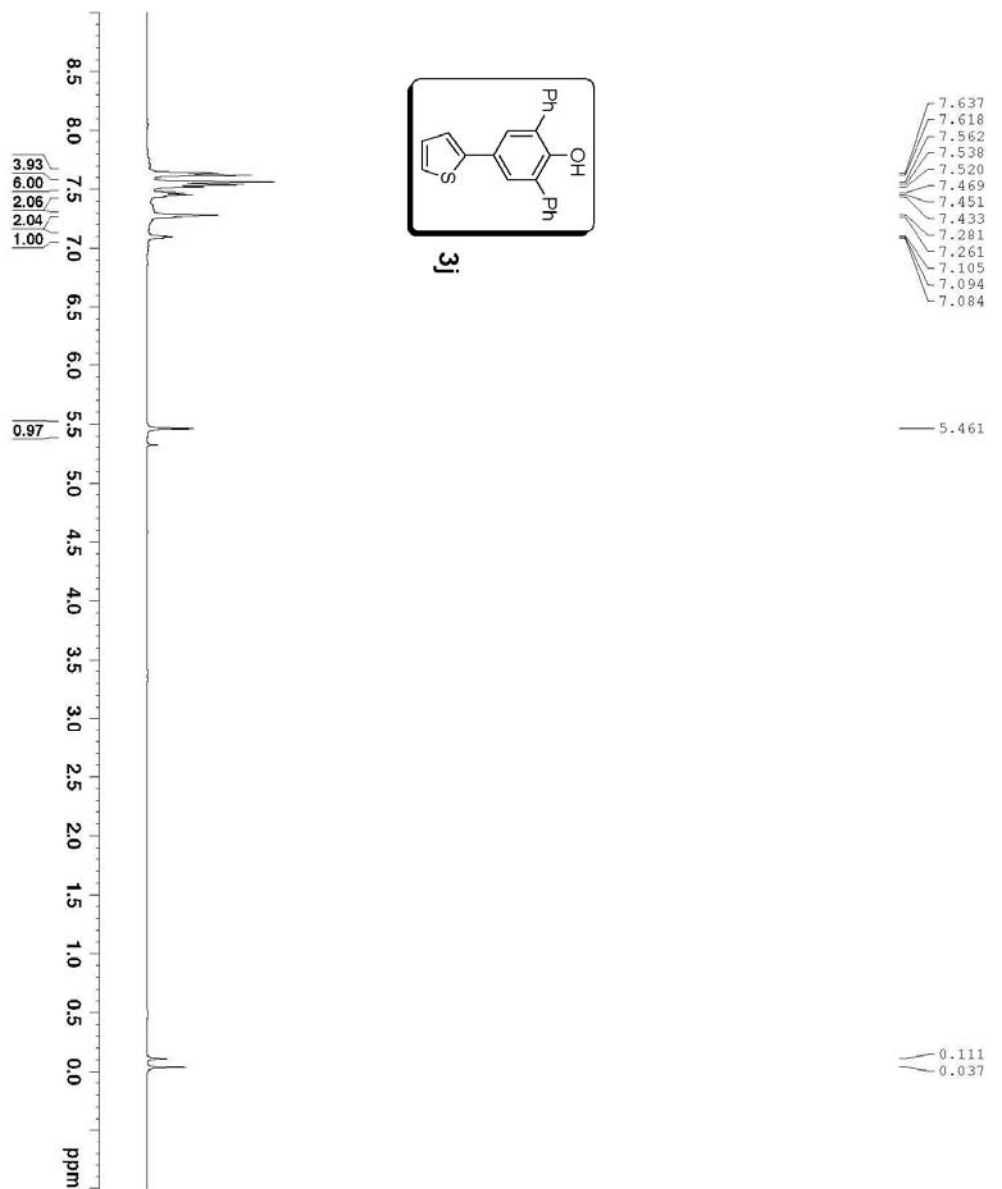

```

NAME                zsm-457
EXPNO                10
PROCNO              1
Date_              20081221
Time                20.01
INSTRUM             spect
PROBHD              5 mm PABBO BB-
PULPROG             zgpg30
SOLVENT             CDCl3
NS                  15
DS                  2
SWH                 8223.685 Hz
FIDRES              0.22483 Hz
AQ                  3.294181 sec
RG                  327.88
DW                  60.800 usec
DE                  6.50 usec
TE                  292.0 K
TD                  1.0000000
TDO
===== CHANNEL f1 =====
NUC1                 1H
P1                   14.00 usec
PL1                  0.00 dB
PL1W                 11.47923053 W
SFO1                 400.1324710 MHz
SI                   327.88
SF                   400.1299993 MHz
WDW                   EM
SSB                   0
LB                   0.30 Hz
GB                   0
PC                   1.00
    
```
